# Supplementary material for: Convergent stereoselective synthesis of multiple sulfated GlcNα(1,4)GlcAβ(1,4) dodecasaccharides
Source: Royal Society of Chemistry journal article supplement (doi:10.1039/c2ob26928g), 2012-01-01
Supplement: c2ob26928g.pdf [file c2ob26928g.pdf]

## Supporting information

# **Convergent Stereoselective Synthesis of Multiple Sulfated Heparosan Dodecasaccharides.**

**Hiroshi Tanaka,\*<sup>a</sup> Yusuke Tateno<sup>a</sup> and Takashi Takahashi\*<sup>a</sup>**

### Heptadecafluoro-undecyl 3-(3,4-dihydro-2H-pyran-2-yl)propanamide (3)

To a stirred solution of (3,4-dihydro-2H-pyran-2-yl)propanoic acid (27.1 mg, 174  $\mu$ mol) in  $\text{CH}_2\text{Cl}_2$  (3.48 mL) was added heptadecafluoro-undecylamine (124 mg, 261  $\mu$ mol) and DCC (53.8 mg, 261  $\mu$ mol, 1.50 eq.) at room temperature. After being stirred at the same temperature for 5 h, the reaction mixture was poured into saturated aq.  $\text{NH}_4\text{Cl}$ . The aqueous layer was extracted with two portions of ethyl acetate. The combined extract was washed with water and brine, dried over  $\text{MgSO}_4$ , filtered and evaporated *in vacuo*. The residue was purified by column chromatography on silica gel (elution with toluene:acetone = 87:13) to give **3** (78.1 mg, 127  $\mu$ mol, 73 %):  $^1\text{H}$  NMR (400 MHz,  $\text{CDCl}_3$ )  $\delta$  6.33 (d, 1H,  $J$  = 5.8 Hz), 5.79 (br-s, 1H), 4.66-4.70 (m, 1H), 3.75-3.82 (m, 1H), 3.35 (q, 2H,  $J$  = 6.3 Hz), 2.28-2.42 (m, 2H), 1.52-2.20 (m, 10H);  $^{13}\text{C}$  NMR (100 MHz,  $\text{CDCl}_3$ )  $\delta$  173.1, 143.4, 100.9, 74.2, 38.6, 32.5, 31.0, 28.5, 28.0, 21.0, 19.8;  $^{19}\text{F}$  NMR (373 MHz,  $\text{CDCl}_3$ )  $\delta$  -112.3, -119.9, -120.1, -120.9, -121.6, -124.3; IR (KBr) 3319, 2925, 1648, 1545, 1204, 1149, 1070, 658 ( $\text{cm}^{-1}$ ); HRMS (ESI-TOF) Calcd for  $\text{C}_{19}\text{H}_{19}\text{NO}_2\text{F}_{17}$   $[\text{M}+\text{H}]^+$  616.1144, found 616.1139.

### N-Hydroxysuccinimidyl (4-methoxyphenylcarbonylthio)acetate (4)

To a stirred solution of mercaptoacetic acid (3.48 mL, 50.0 mmol, 1.00 eq.) in  $\text{H}_2\text{O}$  (50.0 mL) was added  $\text{NaHCO}_3$  (6.30 g, 75.0 mmol, 1.50 eq.) at 0  $^\circ\text{C}$ . After being stirred at the same temperature for 10 min, the reaction mixture was added *p*-methoxy benzoic chloride (6.89 mL, 50.0 mmol) dropwise at 0  $^\circ\text{C}$ . After being stirred at same temperature for 10 min, the reaction mixture was added  $\text{NaHCO}_3$  (6.30 g, 75.0 mmol) at 0  $^\circ\text{C}$ . After being stirred at room temperature, the reaction mixture was poured into ice-cooled 6 M HCl and filtered. The filtrate mixture was recrystallized from  $\text{CH}_2\text{Cl}_2$ -hexane. The residue was used for the next reaction without further purification. To a stirred solution of the residue (50.0 mmol, 1.00 eq.) in dry THF (500 mL) was added SuOH (6.90 g, 60.0 mmol, 1.20 eq.) and DIC (9.28 mL, 60.0 mmol, 1.20 eq.) at room temperature. After being stirred at the same temperature for 3 h, the reaction mixture was poured into saturated aq.  $\text{NH}_4\text{Cl}$ . The aqueous layer was extracted with two portions of ethyl acetate. The combined extract was washed with water and brine, dried over  $\text{MgSO}_4$ , filtered and evaporated *in vacuo*. The residue was precipitated from ethyl acetate-hexane to give **4** (2.22 g, 6.50 mmol, 2 steps 13 %).  $^1\text{H}$  NMR (400 MHz,  $\text{CDCl}_3$ )  $\delta$  7.96 (d, 2H, C,  $J_{\text{B,C}}$  = 8.7 Hz), 6.95 (d, 2H, B,  $J_{\text{B,C}}$  = 8.7 Hz), 4.16 (s, 2H, -D), 3.88 (s, 3H, A), 2.84 (s, 4H, E);  $^{13}\text{C}$  NMR (100 MHz,  $\text{CDCl}_3$ )  $\delta$  187.0, 168.7, 165.1, 164.5, 130.0, 128.5, 114.1, 55.7, 28.2, 25.7; IR (KBr) 2951, 1819, 1657, 1372, 1050, 816, 647 ( $\text{cm}^{-1}$ ); HRMS (ESI-TOF) Calcd for  $\text{C}_{14}\text{H}_{13}\text{NO}_6\text{S}$   $[\text{M}+\text{NH}_4]^+$  341.0807, found 341.0809.

### Phenylthio (methyl 2-O-benzoyl-3-O-benzyl- $\beta$ -D-glucopyranosyluronate (9)

To a stirred solution of phenylthio 2-O-benzoyl-3-O-benzyl-4,6-O-benzylidene- $\beta$ -D-glucopyranoside (6.71 g, 12.1 mmol) in dry  $\text{CH}_2\text{Cl}_2$  (120 mL) was added TFA (30.0 mL) and MeOH (12.0 mL) at 0  $^\circ\text{C}$ . After being stirred at the room temperature for 6 h, the reaction mixture was poured into ice-cooled saturated aq.  $\text{NaHCO}_3$ . The aqueous layer was extracted with two portions of ethyl acetate. The combined

extract was washed with saturated aq.  $\text{NaHCO}_3$  and brine, dried over  $\text{Na}_2\text{SO}_4$ , filtered and evaporated *in vacuo*. The residue was used for the next reaction without further purification. To a stirred solution of the residue in  $\text{CH}_2\text{Cl}_2$  (80.0 mL) and  $\text{H}_2\text{O}$  (40.0 mL) was added catalytic amount of TEMPO (476 mg, 3.02 mmol) and BAIB (8.77 g, 27.2 mmol) at 0 °C. After being stirred at room temperature for 6 h, the reaction mixture was poured into a mixture of saturated aq.  $\text{NaHCO}_3$  and saturated aq.  $\text{Na}_2\text{S}_2\text{O}_3$  with cooling. The aqueous layer was extracted with two portions of ethyl acetate. The combined extract was washed with saturated aq.  $\text{NaHCO}_3$  and 10% aq.  $\text{Na}_2\text{S}_2\text{O}_3$  and brine, dried over  $\text{Na}_2\text{SO}_4$ , filtered and evaporated *in vacuo*. The residue was used for the next reaction without further purification. To a stirred solution of the residue in DMF (60.0 mL) was added MeI (1.89 mL, 30.4 mmol) and  $\text{K}_2\text{CO}_3$  (6.00 g, 100 mg/mL) at 0 °C. After being stirred at room temperature for 10 h, the reaction mixture was neutralized with MeOH and poured into ice-cooled 1 M HCl. The aqueous layer was extracted with two portions of ethyl acetate. The combined extract was washed with 1 M HCl, saturated aq.  $\text{NaHCO}_3$ , and brine, dried over  $\text{Na}_2\text{SO}_4$ , filtered and evaporated *in vacuo*. The residue was precipitated from ethyl acetate-hexane to give **9** (4.25 g, 8.59 mmol, 3 steps 71%):  $[\alpha]_{\text{D}}^{27} +18.8$  (c 0.90,  $\text{CHCl}_3$ );  $^1\text{H}$  NMR (400 MHz,  $\text{CDCl}_3$ )  $\delta$  7.13-8.04 (m, 15H, aromatic), 5.25 (dd, 1H,  $J = 9.2, 9.7$  Hz), 4.82 (d, 1H,  $J = 9.7$  Hz), 4.76 (d, 1H,  $J = 11.6$  Hz), 4.71 (d, 1H,  $J = 11.6$  Hz), 4.03 (dd, 1H,  $J = 9.2, 9.7$  Hz), 3.95 (d, 1H,  $J = 9.7$  Hz), 3.86 (s, 3H), 3.73 (dd, 1H,  $J = 9.2, 9.2$  Hz);  $^{13}\text{C}$  NMR (100 MHz,  $\text{CDCl}_3$ )  $\delta$  169.4, 165.1, 137.7, 133.4, 132.8, 132.6, 130.0, 129.8, 129.0, 128.5, 128.4, 128.2, 128.1, 127.8, (87.3 anomeric), 82.3, 77.7, 74.8, 72.0, 71.5, 53.0; IR (KBr) 3508, 2953, 2913, 1717, 1449, 1301, 1093, 740, 709 ( $\text{cm}^{-1}$ ); HRMS (ESI-TOF) Calcd for  $\text{C}_{27}\text{H}_{27}\text{O}_7\text{S}$   $[\text{M}+\text{H}]^+$  495.1476, found 495.1478.

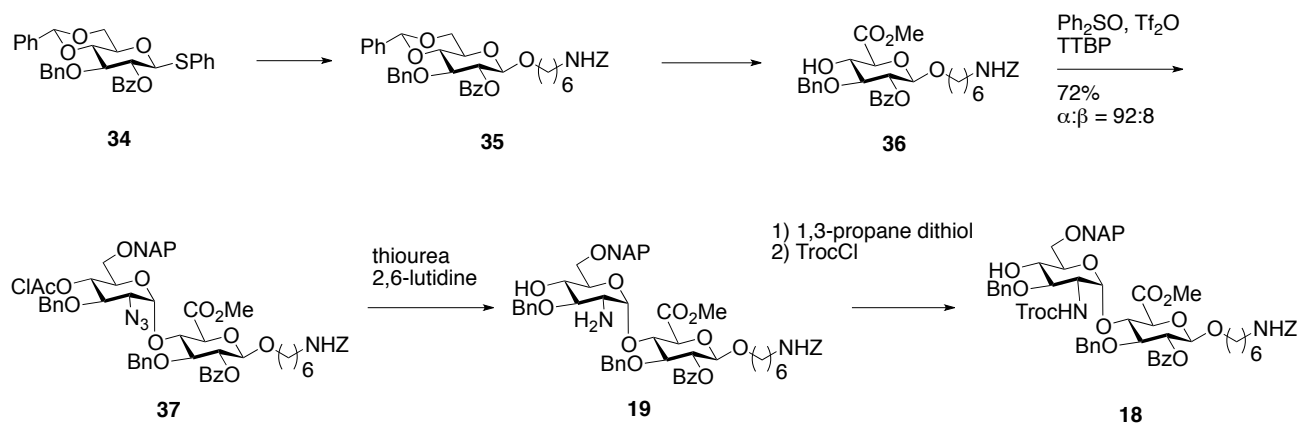

**N-Benzyloxycarbonyl-6-aminohexyl 2-O-benzoyl-3-O-benzyl-4,6-O-benzylidene-β-D-glucopyranoside (35).** A mixture of phenylthio 2-O-benzoyl-3-O-benzyl-4,6-O-benzylidene-β-D-glucopyranoside (**34**) (521 mg, 0.741 mmol), N-benzyloxycarbonyl-6-aminohexanol (280 mg, 1.11 mmol) and pulverized activated MS-4A (741 mg) in dry  $\text{CH}_2\text{Cl}_2$  (7.41 mL) was stirred at room temperature for 30 min under argon to remove a trace amount of water. Then the reaction mixture was cooled to -10 °C. NIS (249 mg, 1.11 mmol) and a catalytic amount of TfOH (20.5  $\mu\text{L}$ , 0.222 mmol) was added to the reaction mixture at -10 °C. After being stirred at the same temperature for 5 h, the reaction mixture was neutralized with  $\text{NEt}_3$  and filtered through a pad of Celite®. The filtrate mixture was poured into a mixture of saturated aq.  $\text{NaHCO}_3$  and 10% aq.

Na<sub>2</sub>S<sub>2</sub>O<sub>3</sub> with cooling. The aqueous layer was extracted with two portions of ethyl acetate. The combined extract was washed with saturated aq. NaHCO<sub>3</sub> and 10% aq. Na<sub>2</sub>S<sub>2</sub>O<sub>3</sub> and brine, dried over MgSO<sub>4</sub>, filtered and evaporated *in vacuo*. The residue was purified by column chromatography on silica gel (elution with toluene:acetone = 98:2) to give **35** (465 mg, 0.652 mmol, 88%):  $[\alpha]_D^{26} +11.7$  (*c* 0.92, CHCl<sub>3</sub>); <sup>1</sup>H NMR (400 MHz, CDCl<sub>3</sub>) δ 7.06-8.03 (m, 20H, aromatic), 5.60 (s, 1H), 5.28 (dd, 1H, *J* = 7.7, 8.2 Hz), 5.05 (s, 2H), 4.83 (d, 1H, *J* = 12.1 Hz), 4.70 (d, 1H, *J* = 12.1 Hz), 4.60 (br-s, 1H), 4.57 (d, 1H, *J* = 7.7 Hz), 4.38 (dd, 1H, *J* = 4.8, 10.6 Hz), 3.82-3.89 (m, 4H), 3.39-3.52 (m, 2H), 2.99 (t, 2H, *J* = 6.3 Hz), 1.11-1.50 (m, 8H, aliphatic); <sup>13</sup>C NMR (100 MHz, CDCl<sub>3</sub>) δ 165.1, 138.0, 137.3, 133.2, 130.0, 129.9, 129.1, 128.6, 128.4x2, 128.2x3, 128.1, 127.6, 126.1, (102.0 anomeric), 81.8, 78.0, 74.0, 73.6, 70.1, 68.8, 66.6, 66.4, 29.8, 29.7, 29.3, 26.3, 25.5; IR (KBr) 2921, 2855, 1720, 1696, 1528, 1452, 1317, 1030, 740, 710 (cm<sup>-1</sup>); HRMS (ESI-TOF) Calcd for C<sub>41</sub>H<sub>49</sub>N<sub>2</sub>O<sub>9</sub> [M+NH<sub>4</sub>]<sup>+</sup> 713.3438, found 713.3447.

***N*-benzyloxycarbonyl-6-aminohexyl (methyl 2-*O*-benzoyl-3-*O*-benzyl-β-D-glucopyranosyluronate (36).**

To a stirred solution of **35** (6.28 g, 9.03 mmol) in dry CH<sub>2</sub>Cl<sub>2</sub> (18.0 mL) was added TFA (9.03 mL) and MeOH (4.50 mL) at 0 °C. After being stirred at the same temperature for 30 min, the reaction mixture was poured into ice-cooled saturated aq. NaHCO<sub>3</sub>. The aqueous layer was extracted with two portions of ethyl acetate. The combined extract was washed with saturated aq. NaHCO<sub>3</sub> and brine, dried over MgSO<sub>4</sub>, filtered and evaporated *in vacuo*. The residue was used for the next reaction without further purification. To a stirred solution of the residue (9.03 mmol) in CH<sub>2</sub>Cl<sub>2</sub> (9.03 mL) and H<sub>2</sub>O (3.01 mL) was added catalytic amount of TEMPO and BAIB (7.27 g, 22.6 mmol, 2.50 eq.) at 0 °C. After being stirred at the same temperature for 6 h, the reaction mixture was poured into a mixture of saturated aq. NaHCO<sub>3</sub> and 10% aq. Na<sub>2</sub>S<sub>2</sub>O<sub>3</sub> with cooling. The aqueous layer was extracted with two portions of ethyl acetate. The combined extract was washed with saturated aq. NaHCO<sub>3</sub> and 10% aq. Na<sub>2</sub>S<sub>2</sub>O<sub>3</sub> and brine, dried over MgSO<sub>4</sub>, filtered and evaporated *in vacuo*. The residue was used for the next reaction without further purification. To a stirred solution of the residue (9.03 mmol, 1.00 eq.) in DMF (45.2 mL) was added MeI (1.40 mL, 22.6 mmol) and K<sub>2</sub>CO<sub>3</sub> (4.52 g, 100 mg/mL) at 0 °C. After being stirred at room temperature for 10 h, the reaction mixture was neutralized with MeOH and poured into ice-cooled 1 M HCl. The aqueous layer was extracted with two portions of ethyl acetate. The combined extract was washed with 1 M HCl, saturated aq. NaHCO<sub>3</sub>, and brine, dried over Na<sub>2</sub>SO<sub>4</sub>, filtered and evaporated *in vacuo*. The residue was precipitated from ethyl acetate-hexane to give **36** (4.02 g, 6.32 mmol, 3 steps 70%):  $[\alpha]_D^{26} +5.25$  (*c* 1.05, CHCl<sub>3</sub>); <sup>1</sup>H NMR (400 MHz, CDCl<sub>3</sub>) δ 7.13-8.00 (m, 15H, aromatic), 5.23 (dd, 1H, *J* = 7.7, 8.7 Hz), 5.08 (s, 2H), 4.77 (d, 1H, *J* = 11.6 Hz), 4.73 (d, 1H, *J* = 11.6 Hz), 4.62 (br-s, 1H), 4.55 (d, 1H, *J* = 7.7 Hz), 4.09 (dd, 1H, *J* = 8.7, 9.7 Hz), 3.91 (d, 1H, *J* = 9.7 Hz), 3.86 (dt, 1H, *J* = 6.3, 9.7 Hz), 3.83 (s, 3H), 3.71 (dd, 1H, *J* = 8.7, 8.7 Hz), 3.42 (dt, 1H, *J* = 6.3, 9.7 Hz), 2.99 (t, 2H, *J* = 6.3 Hz), 1.11-1.47 (m, 8H, aliphatic); <sup>13</sup>C NMR (100 MHz, CDCl<sub>3</sub>) δ 169.8, 165.1, 162.6, 156.4, 156.3, 137.9, 136.8, 133.2, 129.9, 129.8, 128.6, 128.4x2, 128.2, 128.1x2, 127.7, (101.6 anomeric), 80.9, 77.4, 77.3, 77.1, 76.8, 74.4, 73.1, 72.1, 70.1, 66.6, 60.4, 52.8, 40.9x2, 36.5, 31.5, 29.7, 29.2, 26.2, 25.5; IR (KBr) 3394, 2931, 1735, 1533, 1454, 1266, 1094, 756, 712 (cm<sup>-1</sup>); HRMS (ESI-TOF) Calcd for C<sub>35</sub>H<sub>41</sub>NO<sub>10</sub> [M+H]<sup>+</sup> 636.2809, found 636.2813.

**N-benzyloxycarbonyl-6-aminohexyl**

**2-azido-3-O-benzyl-4-O-chloroacetyl-2-deoxy-6-O-**

**naphthylmethyl- $\alpha$ -D-glucopyranosyl-(1 $\rightarrow$ 4)-(methyl**

**2-O-benzoyl-3-O-benzyl- $\beta$ -D-glucopyranosyluronate) (37):** A mixture of **10** (1.00 g, 1.95 mmol), Ph<sub>2</sub>SO (1.10 g, 5.47 mmol), TTBP (1.45 g, 5.87 mmol) and pulverized activated MS-4A (2.5 g) in dry CH<sub>2</sub>Cl<sub>2</sub> (30.0 mL) was stirred at room temperature for 30 min under argon to remove a trace amount of water. Then the reaction mixture was cooled to -60 °C. Tf<sub>2</sub>O (114  $\mu$ L, 0.820 mmol) was added to the reaction mixture at the same temperature. After being stirred at -40 °C for 30 min, a solution of **36** (1.49 g, 2.34 mmol) in dry CH<sub>2</sub>Cl<sub>2</sub> (10.0 mL) was added at -60 °C and the reaction mixture was allowed to warm slowly to room temperature. After being stirred at the same temperature for 5 h, the reaction mixture was neutralized with NEt<sub>3</sub> and filtered through a pad of Celite®. The filtrate mixture was poured into brine. The aqueous layer was extracted with two portions of ethyl acetate. The combined extract was washed with saturated aq. NaHCO<sub>3</sub> and brine, dried over Na<sub>2</sub>SO<sub>4</sub>, filtered and evaporated *in vacuo*. The residue was purified by column chromatography on silica gel (elution with CHCl<sub>3</sub>:MeOH 98:2) and by gel permeation chromatography (GPC) to give **37** (1.54 g, 1.37 mmol, 70%,  $\alpha/\beta$  = >95/5): [ $\alpha$ ]<sub>D</sub><sup>20</sup> +28.5 (*c* 1.63, CHCl<sub>3</sub>); <sup>1</sup>H NMR (400 MHz, CDCl<sub>3</sub>)  $\delta$  7.18-8.05 (m, 27H, aromatic), 5.58 (d, 1H, H-1', *J*<sub>1',2'</sub> = 3.9 Hz), 5.34 (dd, 1H, H-2, *J*<sub>1,2</sub> = 7.6 Hz, *J*<sub>2,3</sub> = 8.7 Hz), 5.23 (dd, 1H, *J* = 9.7, 9.7 Hz), 5.08 (s, 2H), 4.93 (d, 1H, *J* = 11.2 Hz), 4.77 (d, 1H, *J* = 10.2 Hz), 4.72 (d, 1H, *J* = 10.2 Hz), 4.67 (d, 1H, *J* = 11.7 Hz), 4.64 (d, 1H, *J* = 7.6 Hz), 4.60 (d, 1H, *J* = 11.2 Hz), 4.55 (d, 1H, *J* = 11.7 Hz), 4.31 (dd, 1H, *J* = 8.7, 9.2 Hz), 4.10 (d, 1H, *J* = 9.2 Hz), 4.02 (dd, 1H, *J* = 8.7, 8.7 Hz), 3.89 (dd, 1H, *J* = 9.7, 10.1 Hz), 3.85 (m, 1H), 3.71 (s, 3H), 3.63 (ddd, 1H, *J* = 3.4, 4.8, 9.7 Hz), 3.57 (m, 1H), 3.56 (d, 1H, *J* = 14.5 Hz), 3.49 (d, 1H, *J* = 14.5 Hz), 3.46 (dd, 1H, *J* = 3.4 Hz, *J* = 10.1 Hz), 3.42 (m, 1H), 3.37 (dd, 1H, *J* = 3.9, 10.1 Hz), 3.01 (t, 2H, *J* = 6.3 Hz), 1.10-1.52 (m, 8H, aliphatic); <sup>13</sup>C NMR (100 MHz, CDCl<sub>3</sub>)  $\delta$  168.8, 165.9, 165.0, 156.4, 146.6, 137.6, 137.2, 136.8, 135.0, 133.4, 133.3, 133.1, 129.8, 129.7, 128.6, 128.4, 128.2, 128.1x3, 128.0, 127.9x2, 127.7, 127.0, 126.2, 126.1, 126.0, (101.4, 97.4 anomeric), 82.5, 77.3, 74.8, 74.7, 74.6, 74.5, 73.9, 73.8, 72.7, 70.0, 69.0, 68.6, 66.6, 62.9, 52.8, 40.9, 40.5, 29.7, 29.2, 28.1, 26.3, 25.5; IR (KBr) 2934, 2109, 1726, 1265, 1079, 1028, 754, 699 (cm<sup>-1</sup>); HRMS (ESI-TOF) Calcd for C<sub>61</sub>H<sub>69</sub>N<sub>5</sub>O<sub>15</sub>Cl [M+NH<sub>4</sub>]<sup>+</sup> 1146.4479, found 1146.4485.

**Methyl (N-benzyloxycarbonyl-6-aminohexyl 4-O-(2-azido-3-O-benzyl-2-deoxy-6-O-naphthylmethyl-N-benzyloxycarbonyl-6-aminohexyl 2-azido-3-O-benzyl-2-deoxy-6-O-naphthylmethyl- $\alpha$ -D-glucopyranosyl-(1 $\rightarrow$ 4)-(methyl**

**2-O-benzoyl-3-O-benzyl- $\beta$ -D-glucopyranosyluronate) (19).** To a stirred solution of **37** (1.50 g, 1.33 mmol, 1.00 eq.) in DMF (26.6 mL) was added thiourea (10.0 g, 13.3 mmol) and 2,6-lutidine (238  $\mu$ L, 1.60 mmol) at room temperature. After being stirred at 50 °C for 12 h, the reaction mixture was poured into ice-cooled 1 M HCl. The aqueous layer was extracted with two portions of ethyl acetate. The combined extract was washed with 1 M HCl, saturated aq. NaHCO<sub>3</sub>, and brine, dried over Na<sub>2</sub>SO<sub>4</sub>, filtered and evaporated *in vacuo*. The residue was purified by column chromatography on silica gel (elution with toluene:ethyl acetate = 84:16) to give **19** (1.21 g, 1.23 mmol, 93%): [ $\alpha$ ]<sub>D</sub><sup>27</sup> +52.8 (*c* 0.17, CHCl<sub>3</sub>); <sup>1</sup>H NMR (400 MHz, CDCl<sub>3</sub>)  $\delta$  7.14-8.04 (m, 27H, aromatic), 5.50 (d, 1H, *J* = 3.9 Hz), 5.33 (dd, 1H, *J* = 7.6, 8.2 Hz), 5.08 (s, 2H), 4.82 (br-s, 2H), 4.77

(d, 1H,  $J$  = 10.1 Hz), 4.76 (d, 1H,  $J$  = 12.1 Hz), 4.70 (d, 1H,  $J$  = 10.1 Hz), 4.67 (d, 1H,  $J$  = 12.1 Hz), 4.60 (d, 1H,  $J$  = 7.6 Hz), 4.29 (dd, 1H,  $J$  = 8.7, 9.7 Hz), 4.08 (d, 1H,  $J$  = 9.7 Hz), 3.99 (dd, 1H,  $J$  = 8.2, 8.7 Hz), 3.85 (m, 1H), 3.72-3.80 (m, 3H), 3.70 (s, 3H), 3.62 (dd, 1H,  $J$  = 5.3, 9.7 Hz), 3.50 (ddd, 1H,  $J$  = 4.8, 5.3, 9.7 Hz), 3.41 (m, 1H), 3.25 (dd, 1H,  $J$  = 3.9, 9.7 Hz), 3.01 (t, 2H,  $J$  = 6.3 Hz), 1.14-1.48 (m, 8H, aliphatic);  $^{13}\text{C}$  NMR (100 MHz,  $\text{CDCl}_3$ )  $\delta$  168.8, 165.0, 156.4, 155.4x2, 138.2, 137.4, 136.8, 135.1, 133.4, 133.3, 133.1, 129.8x2, 128.6x2, 128.4x2, 128.2, 128.0x2, 127.9, 127.8x2, 126.8, 126.3, 126.1, 125.7, (101.3, 97.8 anomeric), 82.6, 79.4, 75.1, 74.7, 74.6, 74.5, 74.0, 73.8, 72.9, 70.2, 69.9, 66.6, 62.7, 52.7, 40.9, 29.7, 29.2, 26.3, 25.5; IR (KBr) 3417, 2931, 2109, 1727, 1454, 1266, 1071, 1027, 755 ( $\text{cm}^{-1}$ ); HRMS (ESI-TOF) Calcd for  $\text{C}_{59}\text{H}_{68}\text{N}_5\text{O}_{14}$   $[\text{M}+\text{NH}_4]^+$  1070.4772, found 1070.4763.

***N*-benzyloxycarbonyl-6-aminohexyl 3-*O*-benzyl-2-deoxy-6-*O*-naphthylmethyl-2-(2,2,2-trichloroethoxycarbonylamino)- $\alpha$ -D-glucopyranosyl-(1 $\rightarrow$ 4)-(methyl 2-*O*-benzoyl-3-*O*-benzyl- $\beta$ -D-glucopyranosyluronate) (18).** To a stirred solution of **19** (4.00 g, 4.14 mmol) in MeOH (40.0 mL) and THF (5.0 mL) was added 1,3-propanedithiol (2.0 mL) and  $\text{NEt}_3$  (1.0 mL) at room temperature. After being stirred at the same temperature for 24 h, the reaction mixture was added 1,3-propanedithiol (2.0 mL) and  $\text{NEt}_3$  (1.0 mL) at same temperature. After being stirred at the same temperature for another 24 h, the reaction mixture was evaporated *in vacuo*. The residue was briefly purified by column chromatographed on a small amount of silica gel (elution with with  $\text{CHCl}_3$ :MeOH 98:2). To a stirred solution of the residue in THF (60.0 mL) and  $\text{H}_2\text{O}$  (20.0 mL) was added  $\text{NaHCO}_3$  (3.48 g, 41.4 mmol) and  $\text{TrocCl}$  (610  $\mu\text{L}$ , 4.55 mmol) at 0  $^\circ\text{C}$ . After being stirred at the same temperature for 10 min, the reaction mixture was poured into brine. The aqueous layer was extracted with two portions of ethyl acetate. The combined extract was washed with brine, dried over  $\text{Na}_2\text{SO}_4$ , filtered and evaporated *in vacuo*. The residue was purified by column chromatographed on silica gel (elution with toluene:ethyl acetate = 86:14) to give **18** (4.03 g, 3.35 mmol, 2 steps 81%):  $[\alpha]_{\text{D}}^{27} +37.0$  ( $c$  0.71,  $\text{CHCl}_3$ );  $^1\text{H}$  NMR (400 MHz,  $\text{CDCl}_3$ )  $\delta$  7.10-7.99 (m, 27H, aromatic), 5.45 (d, 1H,  $J$  = 9.7 Hz), 5.29-5.33 (m, 2H), 5.08 (s, 2H), 4.59-4.79 (m, 7H), 4.56 (d, 1H,  $J$  = 6.8 Hz), 4.48 (d, 1H,  $J$  = 12.1 Hz), 4.27 (dd, 1H,  $J$  = 9.2, 9.7 Hz), 4.00 (d, 1H,  $J$  = 9.7 Hz), 3.95-4.00 (m, 1H), 3.91 (dd, 1H,  $J$  = 8.7, 9.2 Hz), 3.78-3.86 (m, 3H), 3.69 (s, 3H), 3.65 (dd, 1H,  $J$  = 4.9, 10.2 Hz), 3.57-3.62 (m, 1H), 3.46 (dd, 1H,  $J$  = 10.1, 10.1 Hz), 3.38 (dt, 1H,  $J$  = 6.7, 9.7 Hz), 3.00 (t, 2H,  $J$  = 6.3 Hz), 2.86 (s, 1H), 1.12-1.45 (m, 8H);  $^{13}\text{C}$  NMR (100 MHz,  $\text{CDCl}_3$ )  $\delta$  168.4, 164.9, 156.4, 154.2, 138.4, 136.8, 135.1, 133.4, 133.3, 133.1, 129.8, 129.6, 128.6, 128.5x2, 128.4, 128.1x2, 128.0x2, 127.8, 127.7, 126.3, 126.1, 125.7, (101.3, 99.0 anomeric), 95.4, 81.2, 79.6, 77.3, 75.8, 75.1, 74.7, 74.2, 74.0, 73.8, 72.4, 70.9, 70.0, 69.9, 66.6, 54.6, 52.8, 40.9, 29.7, 29.1, 26.2, 25.5; IR (KBr) 3431, 2939, 1736, 1513, 1266, 1071, 758, 712 ( $\text{cm}^{-1}$ ); HRMS (ESI-TOF) Calcd for  $\text{C}_{62}\text{H}_{71}\text{M}_2\text{O}_{16}\text{Cl}_3$   $[\text{M}+\text{NH}_4]^+$  1218.3900, found 1218.3896.

***N*-benzyloxycarbonyl-6-aminohexyl 2-azido-3-*O*-benzyl-4-*O*-chloroacetyl-2-deoxy-6-*O*- naphthylmethyl  $\alpha$ -D-glucopyranosyl-(1 $\rightarrow$ 4)-(methyl 2-*O*-benzoyl-3-*O*-benzyl- $\beta$ -D-glucopyranosyluronate)-(1 $\rightarrow$ 4)-2-azido-3-*O*-benzyl-2-deoxy-6-*O*-naphthylmethyl- $\alpha$ -D-glucopyranosyl-(1 $\rightarrow$ 4)-(methyl**



**2-O-benzoyl-3-O-benzyl-β-D-glucopyranosyluronate) (21).** A mixture of **14** (97.0 mg, 98.1 μmol) and **19** (68.9 mg, 65.4 μmol) and pulverized activated MS-4A (250 mg) in dry CH<sub>2</sub>Cl<sub>2</sub> (1.30 mL) was stirred at room temperature for 30 min under argon to remove a trace amount of water. Then the reaction mixture was cooled to -40 °C. NIS (22.1 mg, 98.1 μmol) and TfOH (1.75 μL, 19.6 μmol) was added to the reaction mixture at same temperature. After being stirred at -10 °C for 6 h, the reaction mixture was neutralized with NEt<sub>3</sub> and filtered through a pad of Celite®. The filtrate mixture was poured into a mixture of saturated aq. NaHCO<sub>3</sub> and saturated aq. Na<sub>2</sub>S<sub>2</sub>O<sub>3</sub> with cooling. The aqueous layer was extracted with two portions of ethyl acetate. The combined extract was washed with saturated aq. NaHCO<sub>3</sub> and saturated aq. Na<sub>2</sub>S<sub>2</sub>O<sub>3</sub> and brine, dried over Na<sub>2</sub>SO<sub>4</sub>, filtered and evaporated *in vacuo*. The residue was purified by column chromatography on silica gel (elution with CHCl<sub>3</sub>:MeOH = 98:2) and by gel permeation chromatography (GPC) to give **21** (29.7 mg, 15.3 μmol, 25%, β/α = >95/5): [α]<sub>D</sub><sup>28</sup> +34.0 (*c* 1.04, CHCl<sub>3</sub>); <sup>1</sup>H NMR (400 MHz, CDCl<sub>3</sub>) δ 6.92-8.08 (m, 49H, aromatic), 5.53 (d, 1H, *J* = 3.9 Hz), 5.45 (d, 1H, *J* = 3.4 Hz), 5.24-5.30 (m, 2H), 5.20 (dd, 1H, *J* = 7.6, 8.2 Hz), 5.09-5.12 (m, 2H), 5.09 (s, 2H), 4.89 (d, 1H, *J* = 11.6 Hz), 4.55-4.71 (m, 8H, ), 4.52 (d, 1H, *J* = 7.3 Hz), 4.49 (d, 1H, *J* = 12.4 Hz), 4.40 (d, 1H, *J* = 10.6 Hz), 4.15 (dd, 1H, *J* = 8.7, 9.7 Hz), 4.15 (dd, 1H, *J* = 8.7, 9.7 Hz), 3.88-4.03 (m, 6H), 3.79 (dt, 1H, *J* = 5.8, 9.7 Hz), 3.41-3.70 (m, 9H), 3.31-3.39 (m, 2H), 3.21 (dd, 1H, *J* = 3.9, 10.7 Hz), 3.13 (m, 1H), 2.99-3.05 (m, 5H), 2.99 (s, 3H), 1.12-1.44 (m, 8H); <sup>13</sup>C NMR (100 MHz, CDCl<sub>3</sub>) δ 168.6, 168.0, 165.9, 165.0, 164.4, 138.3, 137.5, 137.3, 137.2, 136.8, 135.1, 135.0, 133.6, 133.4x2, 133.3x2, 133.1, 129.8, 129.7, 129.5, 129.2, 128.9, 128.7, 128.6, 128.5, 128.4, 128.3x2, 128.2x2, 128.1, 128.0x2, 127.9, 127.8, 127.7, 127.5, 127.2, 127.1, 127.0, 126.9, 126.7, 126.2, 126.1x2, (101.3, 97.4 anomeric), 82.9, 82.6, 77.7, 77.6, 77.3, 76.3, 75.6, 75.4, 75.0, 74.9x3, 74.7, 74.4, 74.0x2, 73.9, 72.9, 70.4, 69.9, 69.0, 68.6, 66.6, 66.5, 63.3, 62.5, 52.7, 51.8, 40.9, 40.6, 29.7, 29.1, 26.3, 25.5; IR (KBr) 2929, 2109, 1736, 1453, 1264, 1070, 756, 711 (cm<sup>-1</sup>); HRMS (ESI-TOF) Calcd for C<sub>106</sub>H<sub>109</sub>N<sub>7</sub>O<sub>26</sub>Cl [M+H]<sup>+</sup> 1930.7111, found 1930.7087.

#### ***N*-benzyloxycarbonyl-6-aminohexyl**

**3-O-Benzyl-4-O-chloroacetyl-2-deoxy-6-O-naphthylmethyl-2-(2,2,2-trichloroethoxycarbonylamino)-α-D-glucopyranosyl-(1→4)-(methyl**

**2-O-benzoyl-3-O-benzyl-β-D-glucopyranosyluronate)-(1→4)-3-O-Benzyl-2-deoxy-6-O-naphthylmethyl-2-(2,2,2-trichloroethoxycarbonylamino)-α-D-glucopyranosyl-(1→4)-(methyl**

**2-O-benzoyl-3-O-benzyl-β-D-glucopyranosyluronate)-(1→4)-3-O-benzyl-2-deoxy-6-O-naphthylmethyl-2-(2,2,2-trichloroethoxycarbonylamino)-α-D-glucopyranosyl-(1→4)-(methyl**

**2-O-benzoyl-3-O-benzyl-β-D-glucopyranosyluronate) (23).** A mixture of **16** (699 mg, 614 μmol), **6** (1.33 g, 614 μmol) and pulverized activated MS-4A (2.4 g) in dry CH<sub>2</sub>Cl<sub>2</sub> (12.3 mL) was stirred at room temperature for 30 min under argon to remove a trace amount of water. Then the reaction mixture was cooled to -40 °C. NIS (148 mg, 656 μmol, 1.70 eq.) and TfOH (11.0 μL, 123 μmol, 0.30 eq.) was added to the reaction mixture at same temperature. After being stirred at -20 °C for 2 h, the reaction mixture was neutralized with NEt<sub>3</sub> and filtered through a pad of Celite®. The filtrate mixture was poured into a mixture of saturated aq. NaHCO<sub>3</sub> and 10% aq. Na<sub>2</sub>S<sub>2</sub>O<sub>3</sub> with cooling. The aqueous layer was extracted with two

portions of ethyl acetate. The combined extract was washed with saturated aq.  $\text{NaHCO}_3$  and 10% aq.  $\text{Na}_2\text{S}_2\text{O}_3$  and brine, dried over  $\text{Na}_2\text{SO}_4$ , filtered and evaporated *in vacuo*. The residue was purified by MPLC (elution with toluene:ethyl acetate = 90:10 to 80:20) and by gel permeation chromatography (GPC) to give **23** (890 mg, 280  $\mu\text{mol}$ , 68%,  $\beta/\alpha = >95/5$ ):  $[\alpha]_{\text{D}}^{28} +54.6$  (*c* 0.16,  $\text{CHCl}_3$ );  $^1\text{H}$  NMR (400 MHz,  $\text{CD}_2\text{Cl}_2$ )  $\delta$  6.81-8.05 (m, 71H, aromatic), 5.26-5.44 (m, 6H), 5.09-5.19 (m, 4H), 5.07 (s, 2H), 4.99-5.05 (m, 2H), 4.98 (d, 1H,  $J = 12.6$  Hz), 4.90 (d, 1H,  $J = 11.6$  Hz), 4.76 (d, 1H,  $J = 12.1$  Hz), 4.50-4.70 (m, 16H), 4.45 (d, 1H,  $J = 12.1$  Hz), 4.32 (m, 2H), 4.23-4.25 (m, 2H), 3.96-4.15 (m, 6H), 3.67-3.94 (m, 13H), 3.65 (s, 3H), 3.56-3.64 (m, 2H), 3.44-3.52 (m, 3H), 3.30-3.41 (m, 3H), 3.25-3.27 (m, 1H), 3.23 (s, 3H), 3.16-3.19 (m, 2H), 3.14 (s, 3H), 2.92-2.99 (m, 3H), 1.05-1.48 (m, 8H);  $^{13}\text{C}$  NMR (100 MHz,  $\text{CD}_2\text{Cl}_2$ )  $\delta$  168.8, 168.4, 168.3, 166.2, 165.2, 164.7, 156.5, 154.5, 154.4, 139.1, 139.0, 138.3, 137.2, 137.0, 136.4, 136.2, 135.8, 134.2, 134.1, 134.0x2, 133.8, 133.7x2, 133.6, 133.5x2, 133.4, 130.0, 129.9x2, 129.3, 129.2, 129.1, 129.0, 128.9x2, 128.8, 128.7, 128.6x2, 128.5, 128.4x2, 128.3, 128.2, 128.1, 128.0x2, 127.9, 127.8x2, 127.7, 127.1x2, 127.0, 126.9, 126.8, 126.5, 126.3x2, (101.5, 100.4, 100.3, 100.2, 98.2, 97.9 anomeric), 95.8, 82.8, 82.6, 77.9x2, 77.7, 77.6, 77.5, 76.9, 76.6, 75.6, 75.3, 75.2, 75.0, 74.8, 74.7, 74.6, 74.5, 74.4, 74.1, 74.0, 73.9x3, 72.9x2, 71.5x2, 70.4, 67.0, 66.6, 53.1, 52.4, 41.2, 30.1, 30.0, 29.5, 26.6, 25.8; IR (KBr) 3030, 2927, 1736, 1512, 1264, 1070, 1042, 755, 711 ( $\text{cm}^{-1}$ ).

#### ***N*-benzyloxycarbonyl-6-aminohexyl**

**3-*O*-Benzyl-2-deoxy-6-*O*-naphthylmethyl-2-(2,2,2-trichloroethoxycarbonylamino)- $\alpha$ -D-glucopyranosyl-(1 $\rightarrow$ 4)-(methyl**

**2-*O*-benzoyl-3-*O*-benzyl- $\beta$ -D-glucopyranosyluronate)-(1 $\rightarrow$ 4)-3-*O*-Benzyl-2-deoxy-6-*O*-naphthylmethyl-2-(2,2,2-trichloroethoxycarbonylamino)- $\alpha$ -D-glucopyranosyl-(1 $\rightarrow$ 4)-(methyl**

**2-*O*-benzoyl-3-*O*-benzyl- $\beta$ -D-glucopyranosyluronate)-(1 $\rightarrow$ 4)-3-*O*-benzyl-2-deoxy-6-*O*-naphthylmethyl-2-(2,2,2-trichloroethoxycarbonylamino)- $\alpha$ -D-glucopyranosyl-(1 $\rightarrow$ 4)-(methyl**

**2-*O*-benzoyl-3-*O*-benzyl- $\beta$ -D-glucopyranosyluronate) (**23**). To a stirred solution of **22** (1.78 g, 559  $\mu\text{mol}$ ) in DMF (11.2 mL) was added thiourea (128 mg, 1.68 mmol) and 2,6-lutidine (77.2  $\mu\text{L}$ , 671  $\mu\text{mol}$ ) at room temperature. After being stirred at 50  $^\circ\text{C}$  for 12 h, the reaction mixture was poured into ice-cooled 1 M HCl. The aqueous layer was extracted with two portions of ethyl acetate. The combined extract was washed with 1 M HCl, saturated aq.  $\text{NaHCO}_3$ , and brine, dried over  $\text{Na}_2\text{SO}_4$ , filtered and evaporated *in vacuo*. The residue was purified by MPLC (elution with toluene:ethyl acetate = 88:12 to 78:22) to give **23** (1.61 g, 520  $\mu\text{mol}$ , 93%):  $[\alpha]_{\text{D}}^{28} +45.3$  (*c* 0.11,  $\text{CHCl}_3$ );  $^1\text{H}$  NMR (400 MHz,  $\text{CD}_2\text{Cl}_2$ )  $\delta$  6.81-8.04 (m, 71H), 5.38 (d, 1H,  $J = 3.4$  Hz), 5.25-5.34 (m, 4H), 5.09-5.19 (m, 3H), 5.07 (s, 2H), 4.99-5.05 (m, 3H), 4.98 (d, 1H,  $J = 11.6$  Hz), 4.90 (d, 1H,  $J = 11.6$  Hz), 4.82 (d, 1H,  $J = 11.6$  Hz), 4.71-4.78 (m, 2H), 4.64 (d, 1H,  $J = 12.1$  Hz), 4.49-4.59 (m, 13H), 4.45 (d, 1H,  $J = 11.1$  Hz), 4.31-4.37 (m, 2H), 4.23 (d, 1H,  $J = 10.6$  Hz), 4.17 (d, 1H,  $J = 10.6$  Hz), 4.07-4.11 (m, 3H), 3.96-4.03 (m, 2H), 3.66-3.95 (m, 13H), 3.65 (s, 3H), 3.55-3.59 (m, 1H), 3.44-3.50 (m, 4H), 3.30-3.40 (m, 3H), 3.22 (s, 3H), 3.16-3.20 (m, 3H), 3.14 (s, 3H), 2.91-3.03 (m, 4H), 1.03-1.47 (m, 8H);  $^{13}\text{C}$  NMR (100 MHz,  $\text{CD}_2\text{Cl}_2$ )  $\delta$  168.8, 168.4, 168.3, 165.2, 164.7, 156.6, 156.5, 154.5, 154.4, 139.1, 139.0, 138.9, 137.5, 137.2, 137.1, 137.0, 136.3, 136.2, 135.8, 134.1, 134.0, 133.8, 133.7x2,**



133.6, 133.5x2, 133.4, 130.0, 129.9x2, 129.3, 129.2, 129.0, 128.9x2, 128.8x2, 128.7x2, 128.6x3, 128.5, 128.4, 128.3x2, 128.2, 128.1, 128.0, 127.9, 127.8x2, 127.7, 127.5, 127.2, 127.1x2, 127.0, 126.9, 126.5, 126.3, 126.1, (101.5, 100.9, 100.4, 100.2, 98.2, 98.0 anomeric), 95.9, 95.8x2, 82.8, 82.7, 82.6, 79.8, 77.9, 77.6, 77.5, 76.9, 76.6, 75.6, 75.3, 75.2x2, 75.0, 74.9, 74.8x2, 74.7x2, 74.6, 74.5, 74.4, 74.2, 74.1, 74.0x2, 73.9, 73.8, 73.0, 71.5, 71.4, 71.1, 70.6, 70.4, 67.0, 66.6, 54.8, 53.0, 52.5, 52.4, 41.2, 30.1, 30.0, 29.5, 26.6, 25.8; IR (KBr) 3029, 2927, 1736, 1510, 1264, 1070, 756, 711 (cm<sup>-1</sup>); HRMS (ESI-TOF) Calcd for C<sub>158</sub>H<sub>160</sub>N<sub>4</sub>O<sub>42</sub>Cl<sub>9</sub> [M+H]<sup>+</sup> 3099.7704, found 3099.7690.

### ***N*-benzyloxycarbonyl-6-aminohexyl**

**3-*O*-Benzyl-4-*O*-chloroacetyl-2-deoxy-6-*O*-naphthylmethyl-2-(2,2,2-trichloroethoxycarbonylamino)- $\alpha$ -D-glucopyranosyl-(1 $\rightarrow$ 4)-(methyl 2-*O*-benzoyl-3-*O*-benzyl- $\beta$ -D-glucopyranosyluronate)-(1 $\rightarrow$ 4)-3-*O*-benzyl-2-deoxy-6-*O*-naphthylmethyl-2-(2,2,2-trichloroethoxycarbonylamino)- $\alpha$ -D-glucopyranosyl-(1 $\rightarrow$ 4)-(methyl 2-*O*-benzoyl-3-*O*-benzyl- $\beta$ -D-glucopyranosyluronate)-(1 $\rightarrow$ 4)-3-*O*-Benzyl-2-deoxy-6-*O*-naphthylmethyl-2-(2,2,2-trichloroethoxycarbonylamino)- $\alpha$ -D-glucopyranosyl-(1 $\rightarrow$ 4)-(methyl 2-*O*-benzoyl-3-*O*-benzyl- $\beta$ -D-glucopyranosyluronate)-(1 $\rightarrow$ 4)-3-*O*-benzyl-2-deoxy-6-*O*-naphthylmethyl-2-(2,2,2-trichloroethoxycarbonylamino)- $\alpha$ -D-glucopyranosyl-(1 $\rightarrow$ 4)-(methyl 2-*O*-benzoyl-3-*O*-benzyl- $\beta$ -D-glucopyranosyluronate) (24).**

A mixture of **16** (786 mg, 691  $\mu$ mol, 1.50 eq.), **23** (1.43 g, 461  $\mu$ mol, 1.00 eq.) and pulverized activated MS-4A (1.8 g) in dry CH<sub>2</sub>Cl<sub>2</sub> (9.2 mL) was stirred at room temperature for 30 min under argon to remove a trace amount of water. Then the reaction mixture was cooled to -40 °C. NIS (166 mg, 738  $\mu$ mol) and TfOH (8.21  $\mu$ L, 92.2  $\mu$ mol) was added to the reaction mixture at same temperature. After being stirred at -20 °C for 2 h, the reaction mixture was neutralized with NEt<sub>3</sub> and filtered through a pad of Celite®. The filtrate mixture was poured into a mixture of saturated aq. NaHCO<sub>3</sub> and 10% aq. Na<sub>2</sub>S<sub>2</sub>O<sub>3</sub> with cooling. The aqueous layer was extracted with two portions of ethyl acetate. The combined extract was washed with saturated aq. NaHCO<sub>3</sub> and 10% aq. Na<sub>2</sub>S<sub>2</sub>O<sub>3</sub> and brine, dried over Na<sub>2</sub>SO<sub>4</sub>, filtered and evaporated *in vacuo*. The residue was purified by MPLC (elution with toluene:ethyl acetate = 90:10 to 80:20) and by gel permeation chromatography (GPC) to give **24** (1.11 g, 267  $\mu$ mol, 58%,  $\alpha/\beta$  = >95/5). (Spectra were shown in text.)

### **Synthesis of *N*-sulfated dodecasaccharide 2.**

**Hexaaminododecasaccharide 31.** To a stirred solution of **28** (290 mg, 44.1  $\mu$ mol) in CH<sub>2</sub>Cl<sub>2</sub> (1.00 mL) and AcOH (50.0  $\mu$ L) was added Zn dust (150 mg) at room temperature. After being stirred at the same temperature for 1 h or 12 h, the reaction mixture was poured into ice-cooled saturated aq. NaHCO<sub>3</sub> and filtered through a pad of Celite®. The filtrate was evaporated *in vacuo*. The residue was purified by MPLC (elution with toluene:acetone:NEt<sub>3</sub> 93.75:6:0.25 to 79.75:20:0.25) to give **31** (97.5 mg, 17.7  $\mu$ mol, 40%): <sup>1</sup>H NMR

(400 MHz, CDCl<sub>3</sub>)  $\delta$  6.75-8.05 (m, 548H, aromatic), 5.20-5.50 (m, 34H), 4.92-5.17 (m, 58H), 4.70-4.92 (m, 17H), 4.05-4.69 (m, 102H), 3.30-4.02 (m, 192H), 2.90-3.29 (m, 106H), 2.61-2.85 (m, 106H), 1.02-2.40 (m, 88H); <sup>19</sup>F NMR (373 MHz, CDCl<sub>3</sub>)  $\delta$  -112.4, -120.0, -120.2, -121.0, -121.6, -124.4; IR (KBr) 3383, 2926, 1753, 1453, 1265, 1038, 755, 710 (cm<sup>-1</sup>).

**Sulfonamide dodecasaccharide 32.** To a stirred solution of **31** (78.3 mg, 14.2  $\mu$ mol) in dry DMF (1.0 mL) was added SO<sub>3</sub> · NEt<sub>3</sub> (181 mg) and NEt<sub>3</sub> (50  $\mu$ L) at room temperature. After being stirred at r.t. for 24 h, the reaction mixture was neutralized with 5% aq. NaHCO<sub>3</sub> and evaporated *in vacuo*. The residue was purified by fluororous column chromatography (Fluoro Flash<sup>®</sup> SPE) to give **32** (40.0 mg, 6.52  $\mu$ mol, 46%): <sup>1</sup>H NMR (400 MHz, CD<sub>3</sub>OD)  $\delta$  6.70-8.05 (m, 548H, aromatic), 5.52-5.85 (m, 13H), 5.13-5.50 (m, 17H), 4.57-5.11 (m, 110H), 4.35-4.55 (m, 52H), 2.90-4.55 (m, 352H), 0.90-2.50 (m, 88H); <sup>19</sup>F NMR (373 MHz, CD<sub>3</sub>OD)  $\delta$  -112.3, -120.0, -120.2, -121.0, -121.6, -124.3; IR (KBr) 3449, 2956, 1735, 1453, 1264, 1071, 760, 710 (cm<sup>-1</sup>).

**Carboxylate-dodecasaccharide 33.** To a stirred solution of **32** (19.8 mg, 3.23  $\mu$ mol) in 1,4-dioxane (0.60 mL) and H<sub>2</sub>O (0.30 mL) was added NaOMe (10.0 mg) at room temperature. After being stirred at 35 °C for 24 h, the reaction mixture was evaporated *in vacuo*. The residue was purified by size exclusion column chromatography on Sephadex PD-10 to give **33**. (17.5 mg, 3.23  $\mu$ mol): <sup>1</sup>H NMR (400 MHz, CD<sub>3</sub>OD)  $\delta$  7.05-7.90 (m, 428H, aromatic), 4.90-5.70 (m, 53H), 4.40-4.82 (m, 88H), 3.39-4.38 (m, 235H), 2.60-3.27 (m, 96H), 0.85-2.40 (m, 88H); <sup>19</sup>F NMR (373 MHz, CD<sub>3</sub>OD)  $\delta$  -111.8, -114.3, -119.6, 120.4, -121.0, -121.2, -123.9; IR (KBr) 3419, 2929, 1634, 1454, 1206, 1040, 753, 699 (cm<sup>-1</sup>).

## **N-sulfated dodecasaccharide 2.**

To a solution of **33** (19.1 mg, 3.24  $\mu$ mol) dry THF (0.500 mL), liq. NH<sub>3</sub> (4.5 mL) and Na (20.0 mg) were added at -78 °C. After being stirred at the same temperature for 30 min, the reaction mixture was quenched with NH<sub>4</sub>Cl. The residue was evaporated *in vacuo* and purified by size exclusion column chromatography on Sephadex PD-10 to give glucopyranoside-linking-fluororous tag. To a stirred solution of the residue in 1,4-dioxane (0.60 mL) and H<sub>2</sub>O (0.30 mL) was added **4** (8.0 mg, 20.2  $\mu$ mol, 10.0 eq.) and NaHCO<sub>3</sub> (10.0 mg) at room temperature. After being stirred at the same temperature for 6 h, the reaction mixture was immediately used in next step. To a stirred solution of the residue in 1,4-dioxane (0.60 mL) and H<sub>2</sub>O (0.30 mL) was added TFA (0.050 mL) at 0 °C. After being stirred at same temperature for 20 min, the reaction mixture was added ethyl acetate (10.0 mL) and H<sub>2</sub>O (5.0 mL). After being stirred at room temperature for 5 min, the aqueous layer was quenched with NaHCO<sub>3</sub> aq. and evaporated *in vacuo*. To a stirred solution of the residue in H<sub>2</sub>O (1.00 mL) was added DOWEX cation exchange resin Na form (10.0 mg) at room temperature. After being stirred at the same temperature for 5 min, the reaction mixture was filtered and purified by size exclusion column chromatography on Sephadex PD-10. (5.50 mg, 1.94  $\mu$ mol, 60%).

[ $\alpha$ ]<sub>D</sub><sup>26</sup> +57.5 (*c* 0.24, H<sub>2</sub>O); <sup>1</sup>H NMR (400 MHz, D<sub>2</sub>O)  $\delta$  7.99 (d, 2H, *C*, *J* = 9.2 Hz), 7.10 (d, 2H, *J* = 9.2 Hz), 5.62 (d, 1H, *J* = 3.4 Hz), 5.57-5.60 (m, 5H), 4.47-4.51 (d, 5H), 4.33 (d, 1H, *J* = 7.7 Hz), 3.91 (s, 3H), 3.63-3.87 (m, 49H), 3.59 (dd, 1H, *J* = 9.2 Hz, *J* = 9.7 Hz), 3.48-3.51 (m, 1H), 3.45 (dd, 1H, *J* = 9.2, 9.7 Hz),

3.36-3.40 (m, 5H), 3.18-3.30 (m, 9H), 1.44-1.51 (m, 4H), 1.20-1.29 (m, 4H);  $^{13}\text{C}$  NMR (100 MHz,  $\text{D}_2\text{O}$ )  $\delta$  172.4x3, 172.3, 171.3, 164.5, 135.2, 130.1, 129.0, 128.5, 114.7, (102.6x2, 102.5, 102.4, 102.3x2, 98.2x3, 98.0), 78.2, 78.1, 77.3, 77.1, 76.9, 76.8, 76.0, 75.8x2, 74.4, 74.3x3, 74.2, 74.1, 73.0, 72.8, 72.4, 71.4, 71.2x3, 70.8, 69.6, 69.5, 67.9, 61.9, 60.2, 59.5, 58.2, 58.1, 56.1, 54.3, 54.2, 39.8, 32.9, 30.5, 28.8, 28.3, 25.7, 25.6, 25.5, 24.7x2, 24.6, 22.2; IR (KBr) 3294, 2942, 1726, 1651, 1219, 1017, 915, 644 ( $\text{cm}^{-1}$ ); HRMS (ESI-TOF) Calcd for  $\text{C}_{88}\text{H}_{137}\text{N}_7\text{O}_{82}\text{S}_7\text{Na}$   $[\text{M}+\text{Na}]^+$  2850.4708, found 2850.4587.
