# Supplementary figures and images for: Convergent stereoselective synthesis of multiple sulfated GlcNα(1,4)GlcAβ(1,4) dodecasaccharides
Source: Royal Society of Chemistry journal article supplement (doi:10.1039/c2ob26928g), 2012-01-01

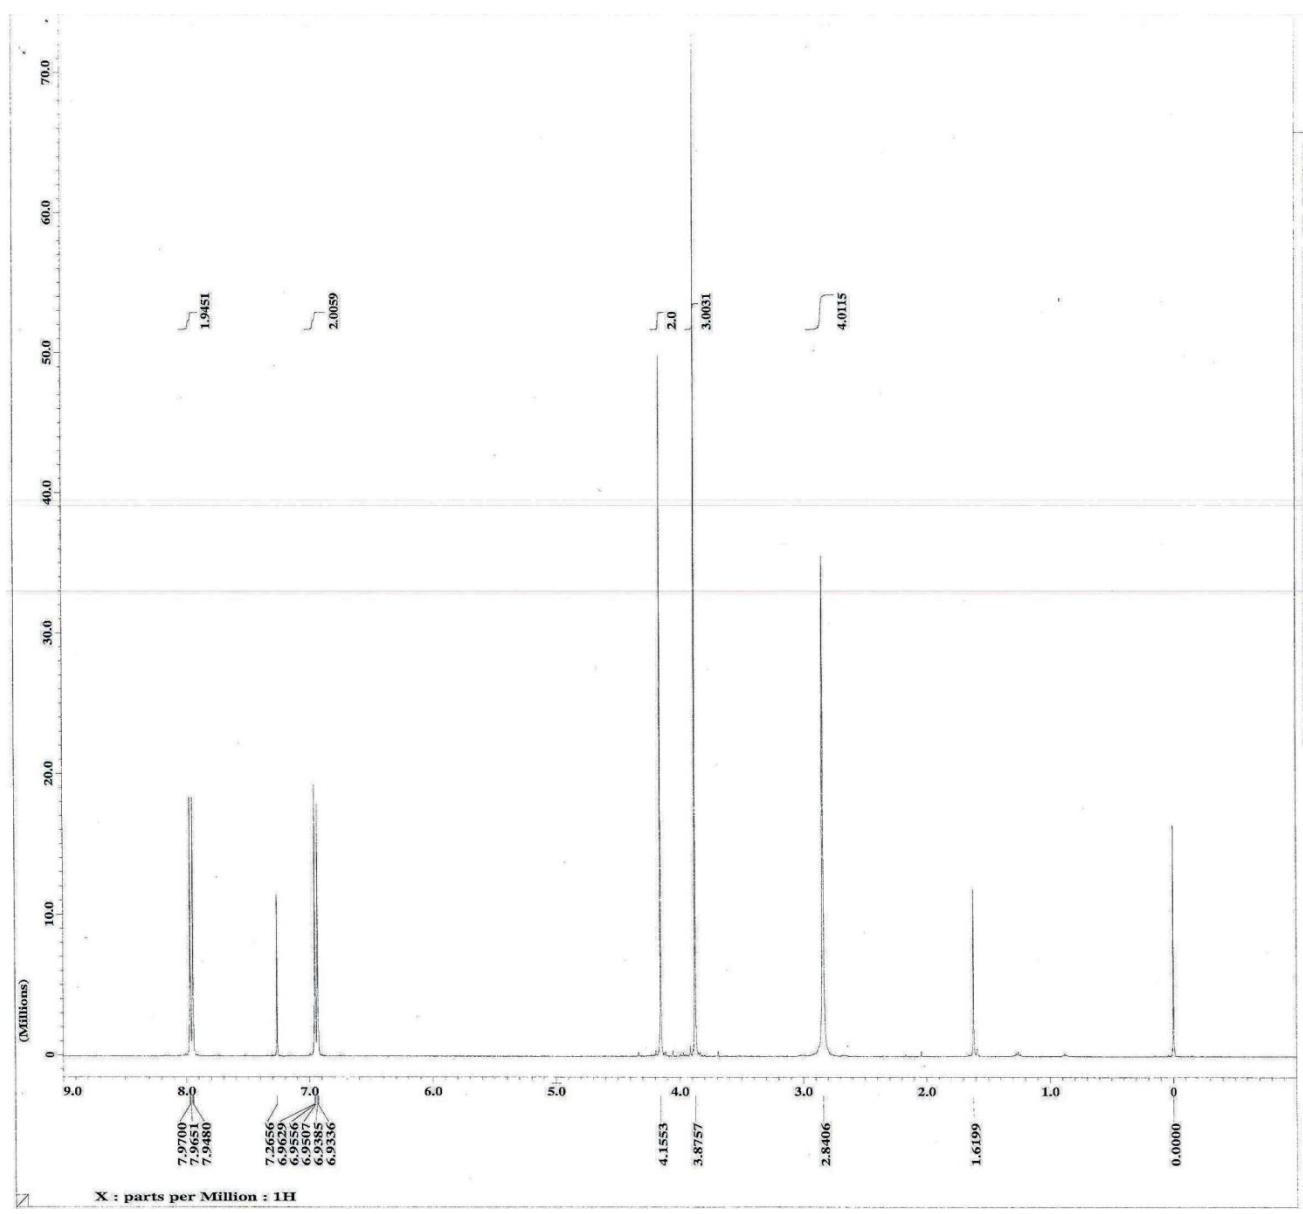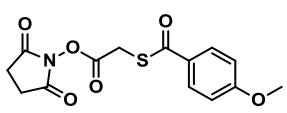

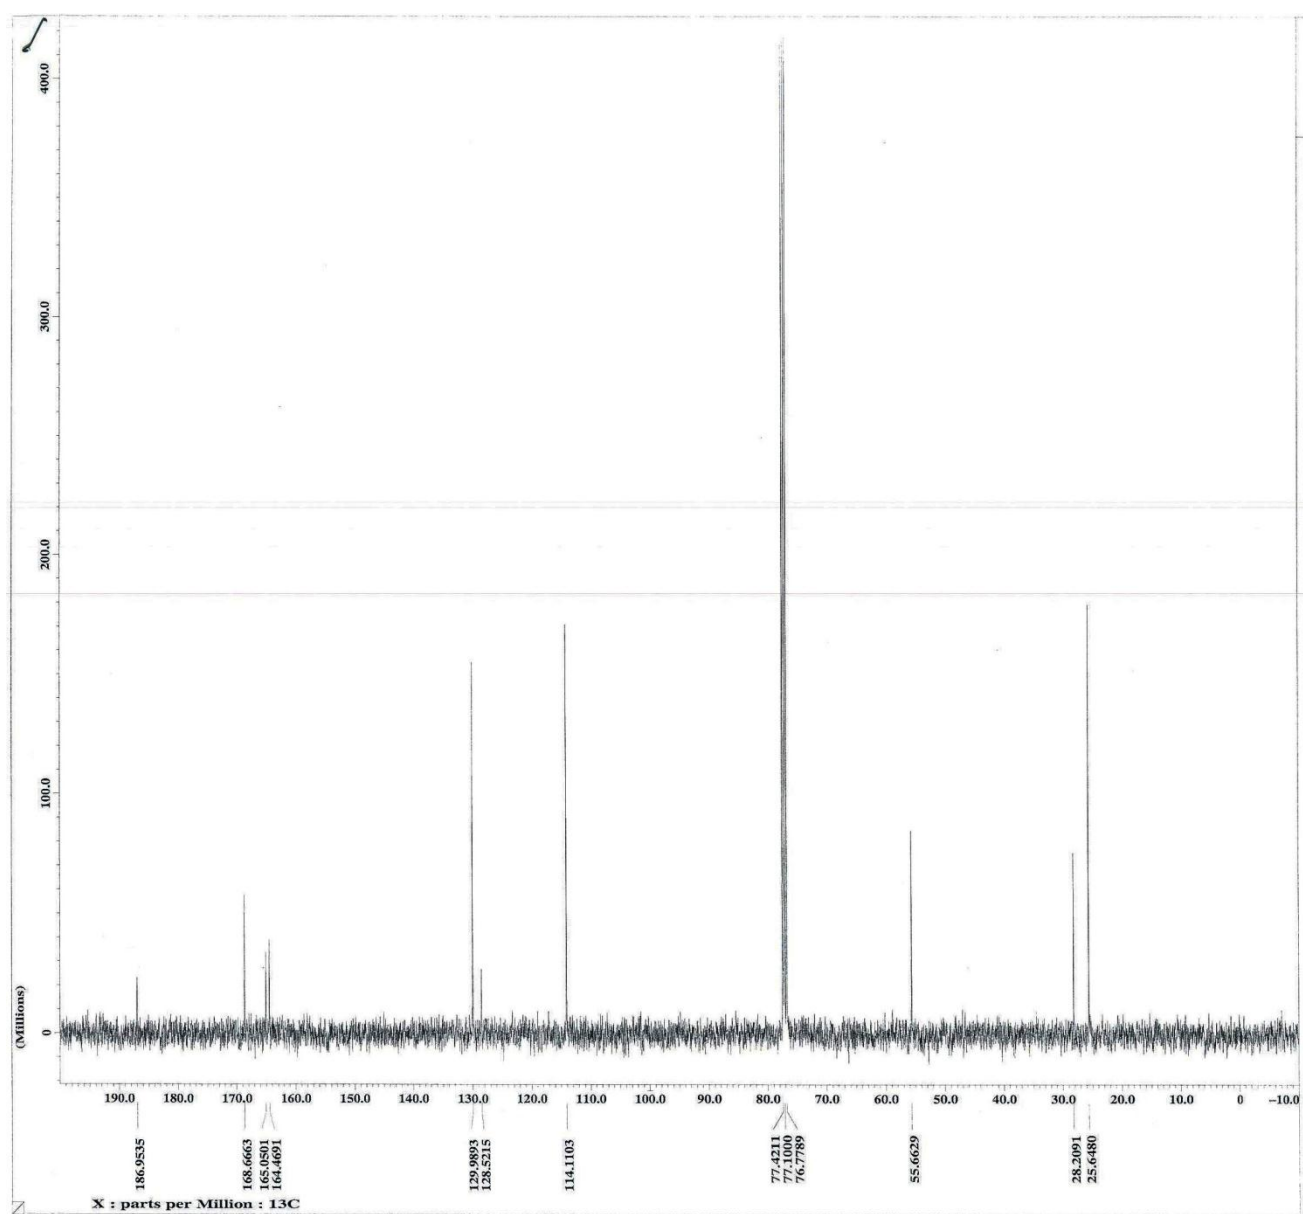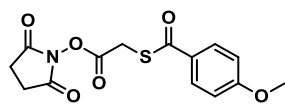



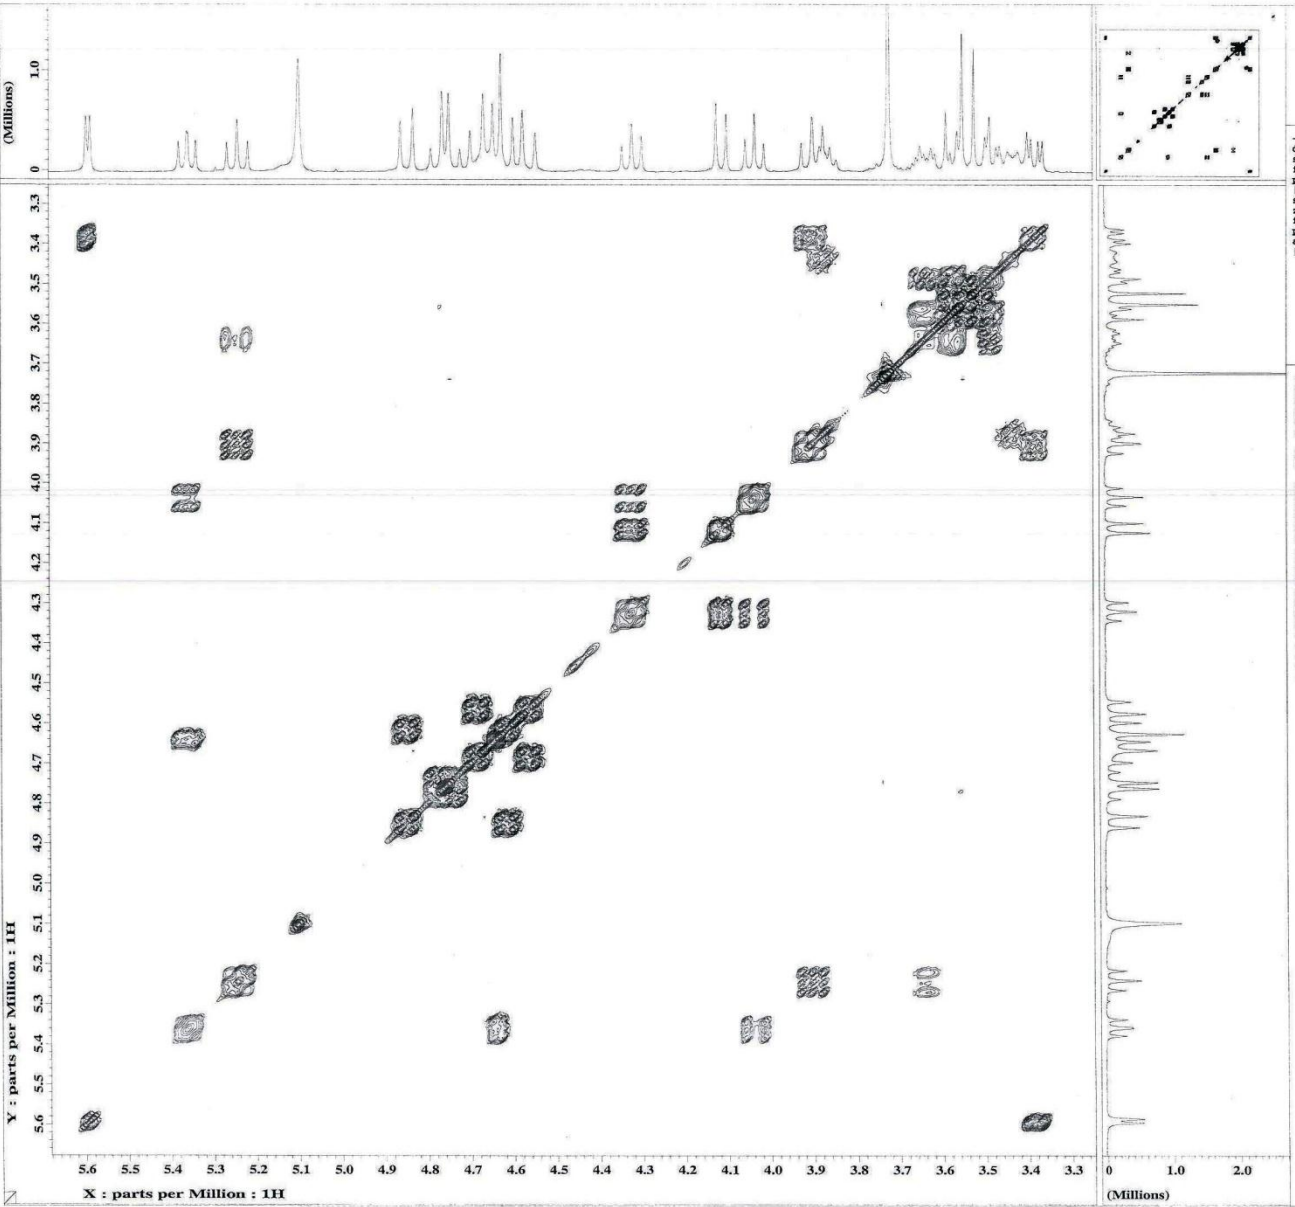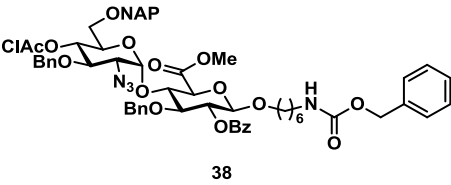



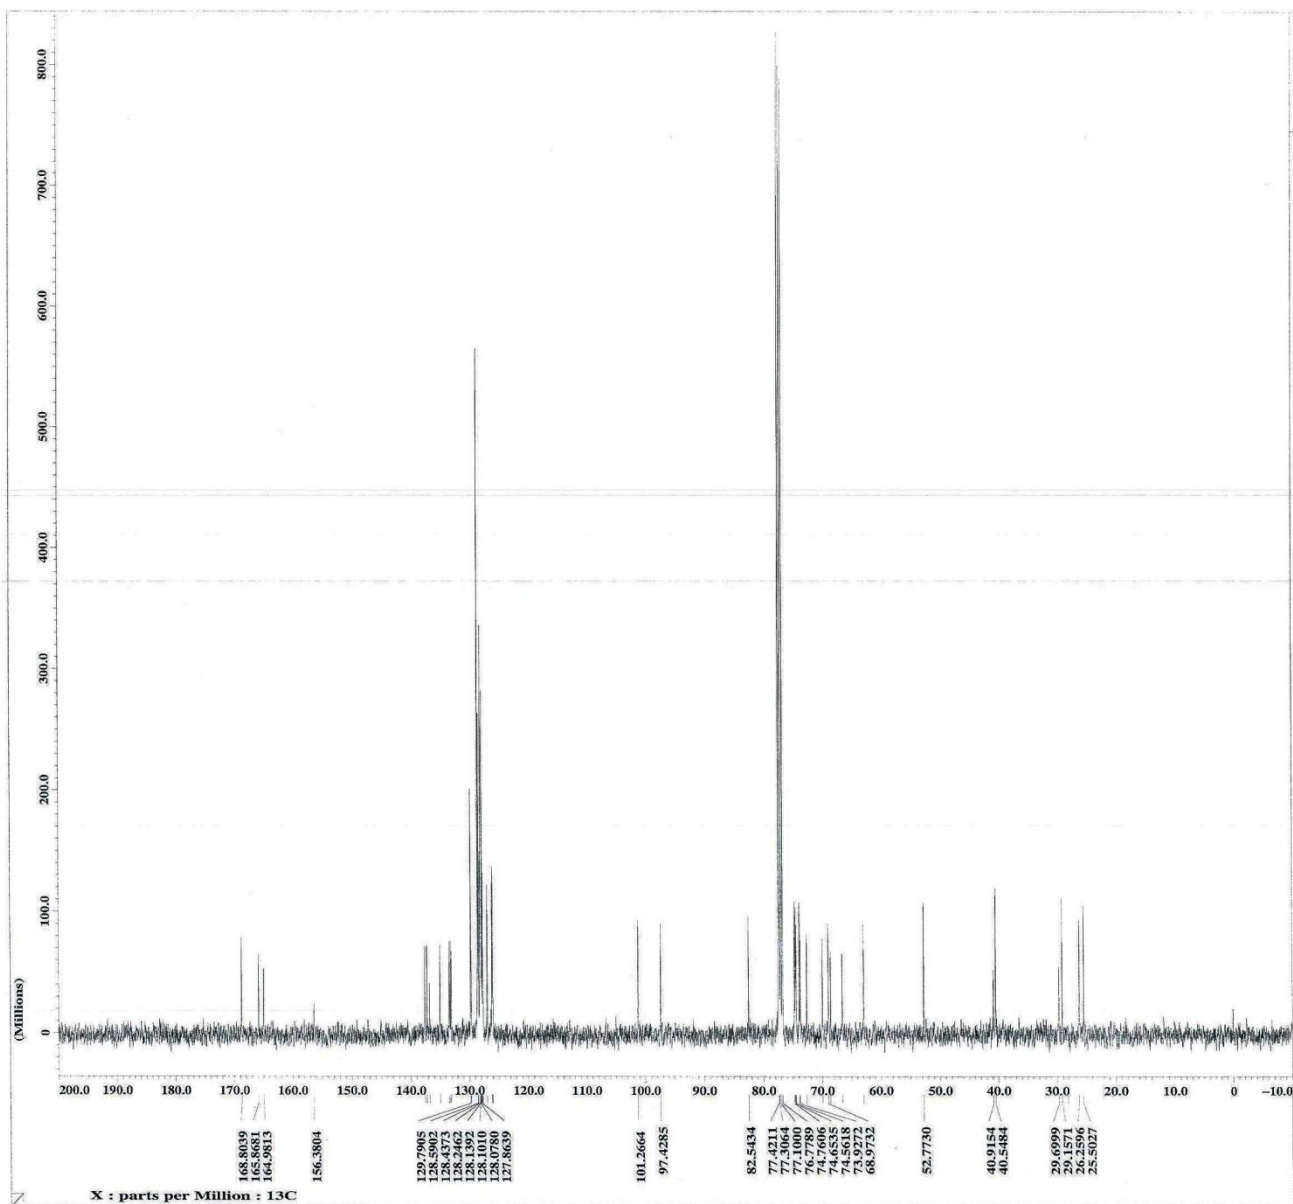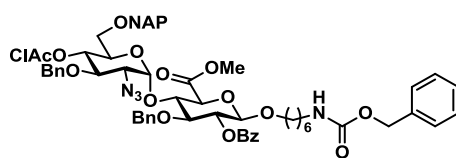

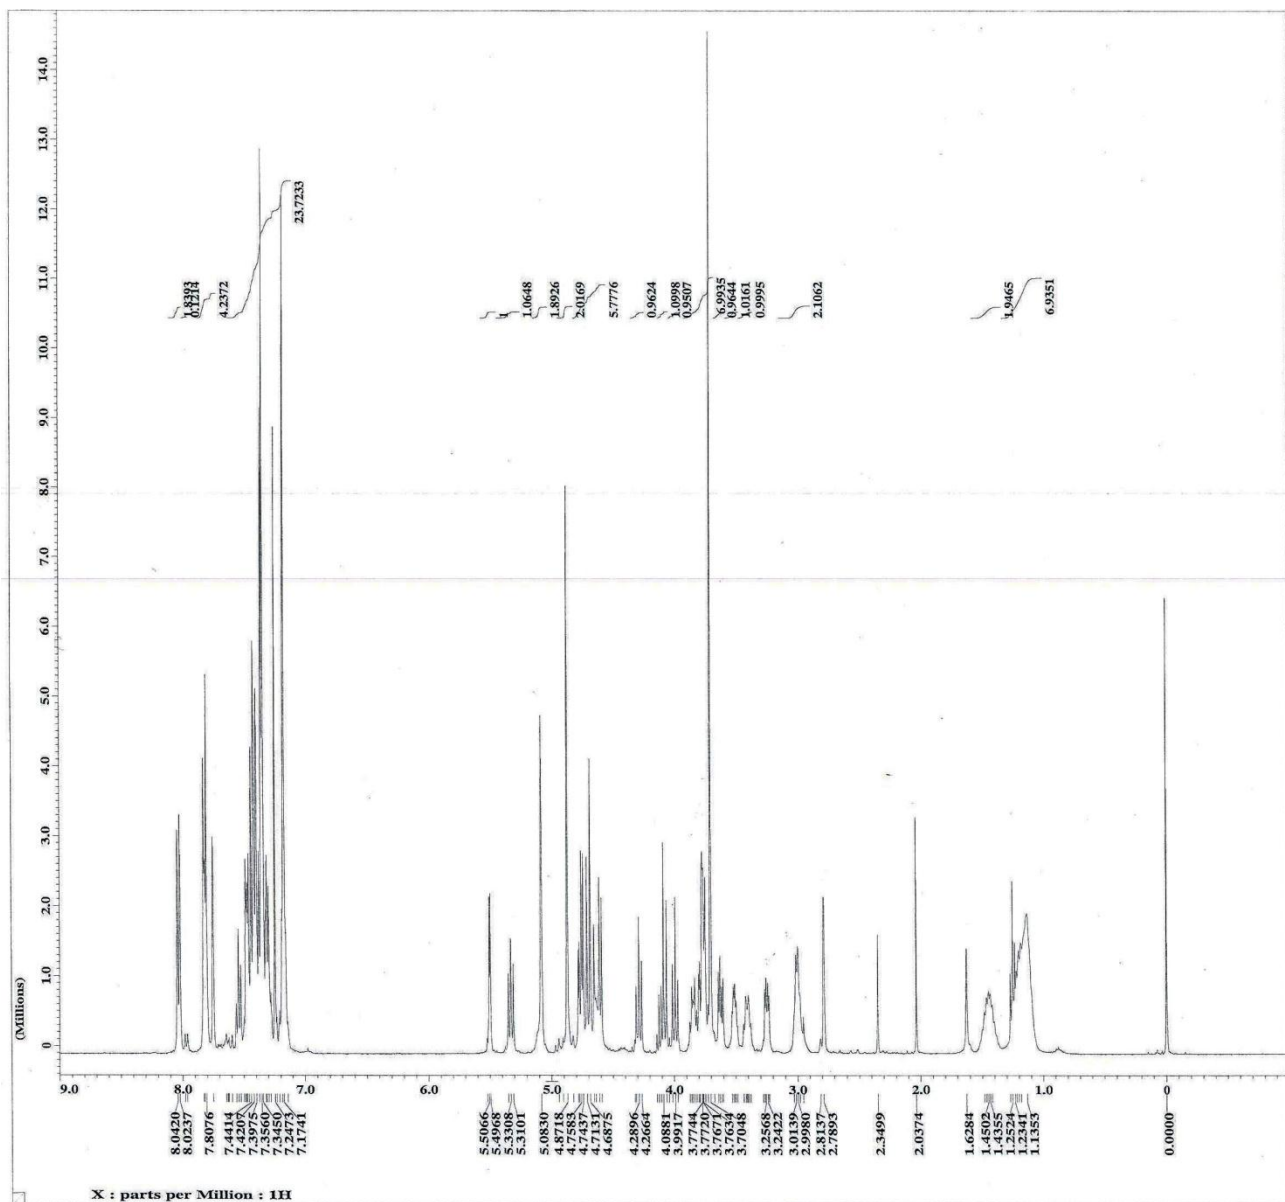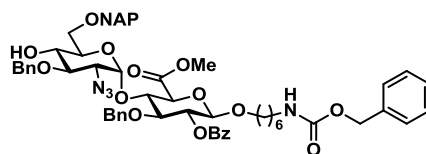

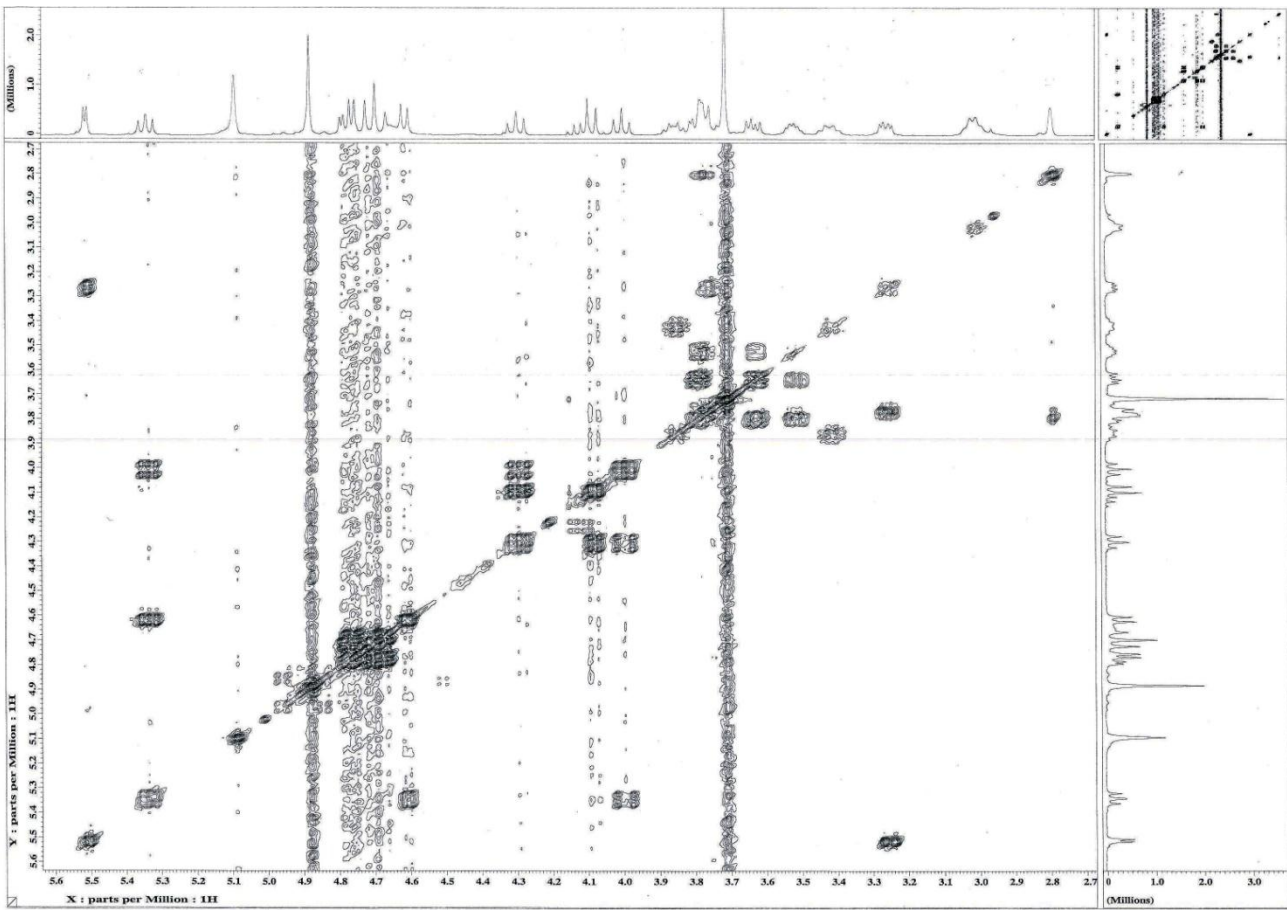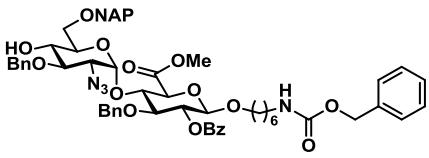

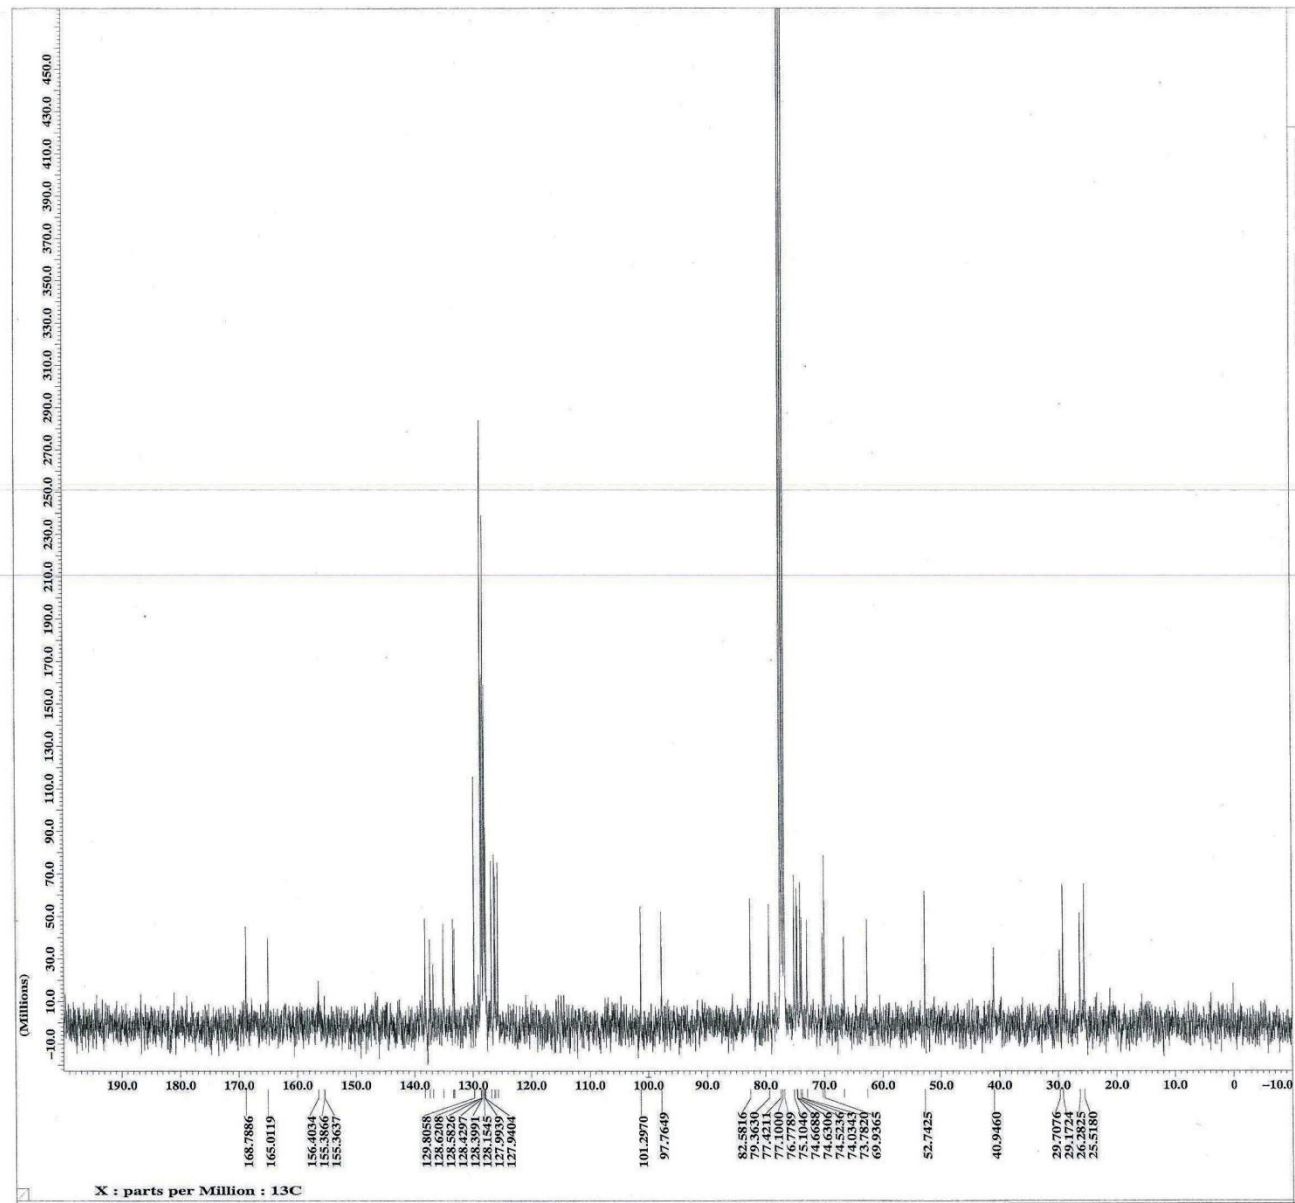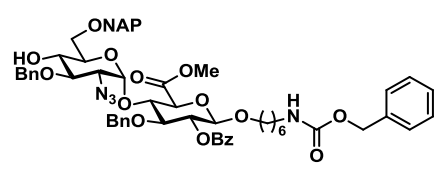

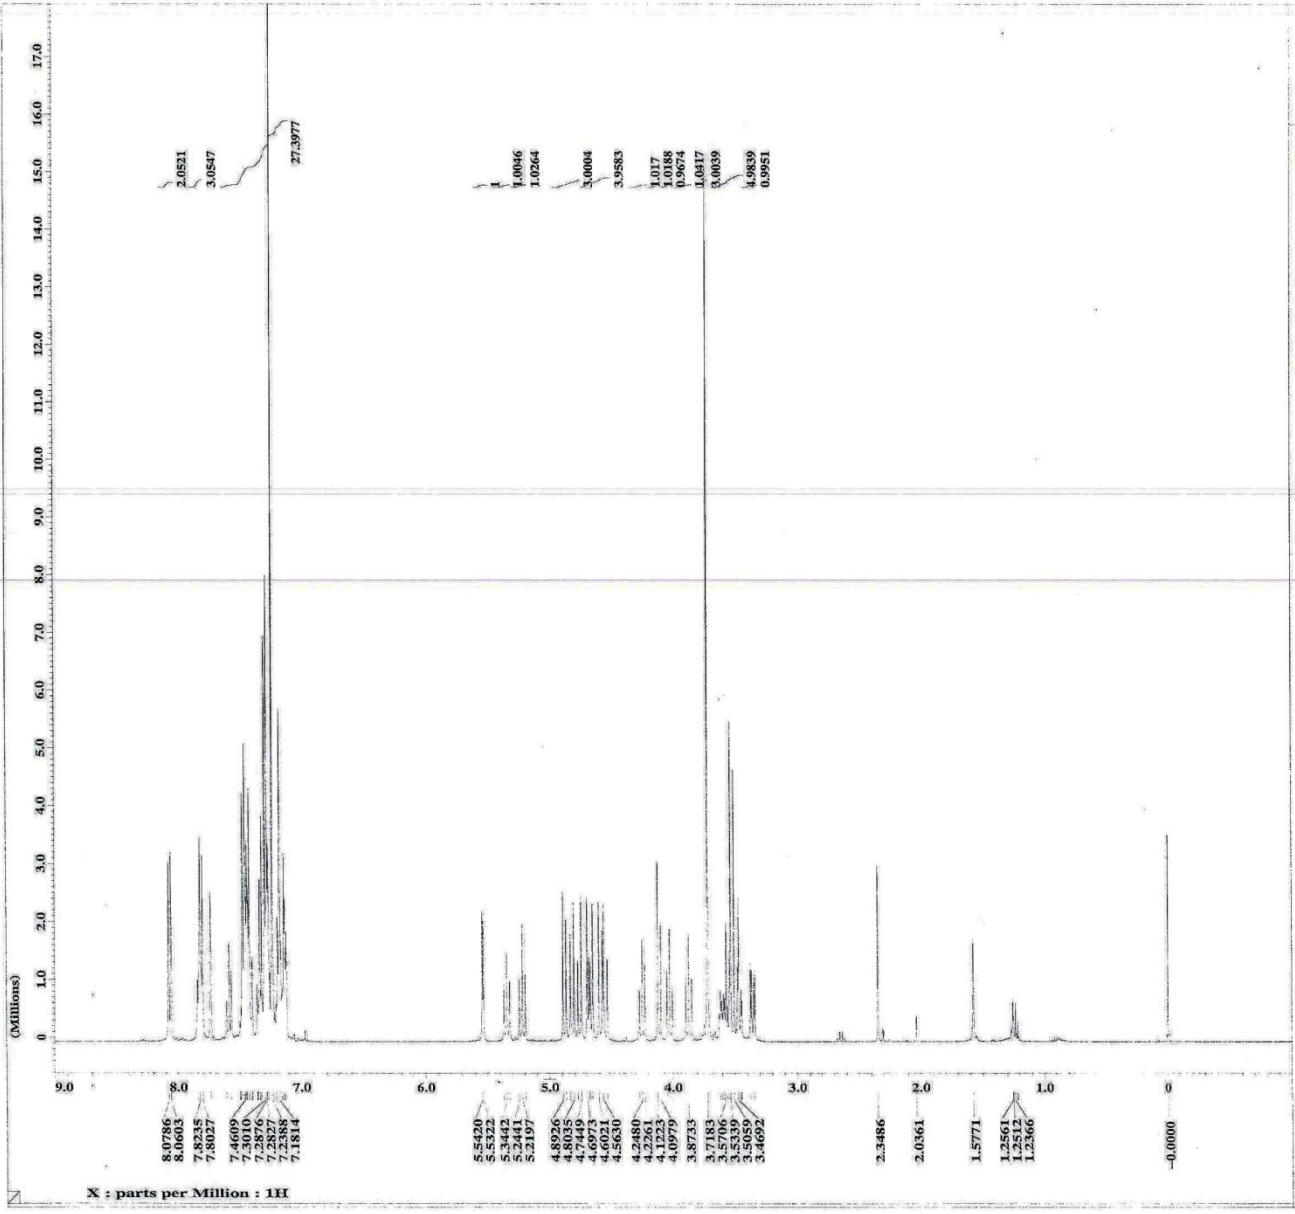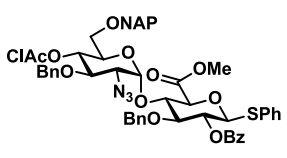

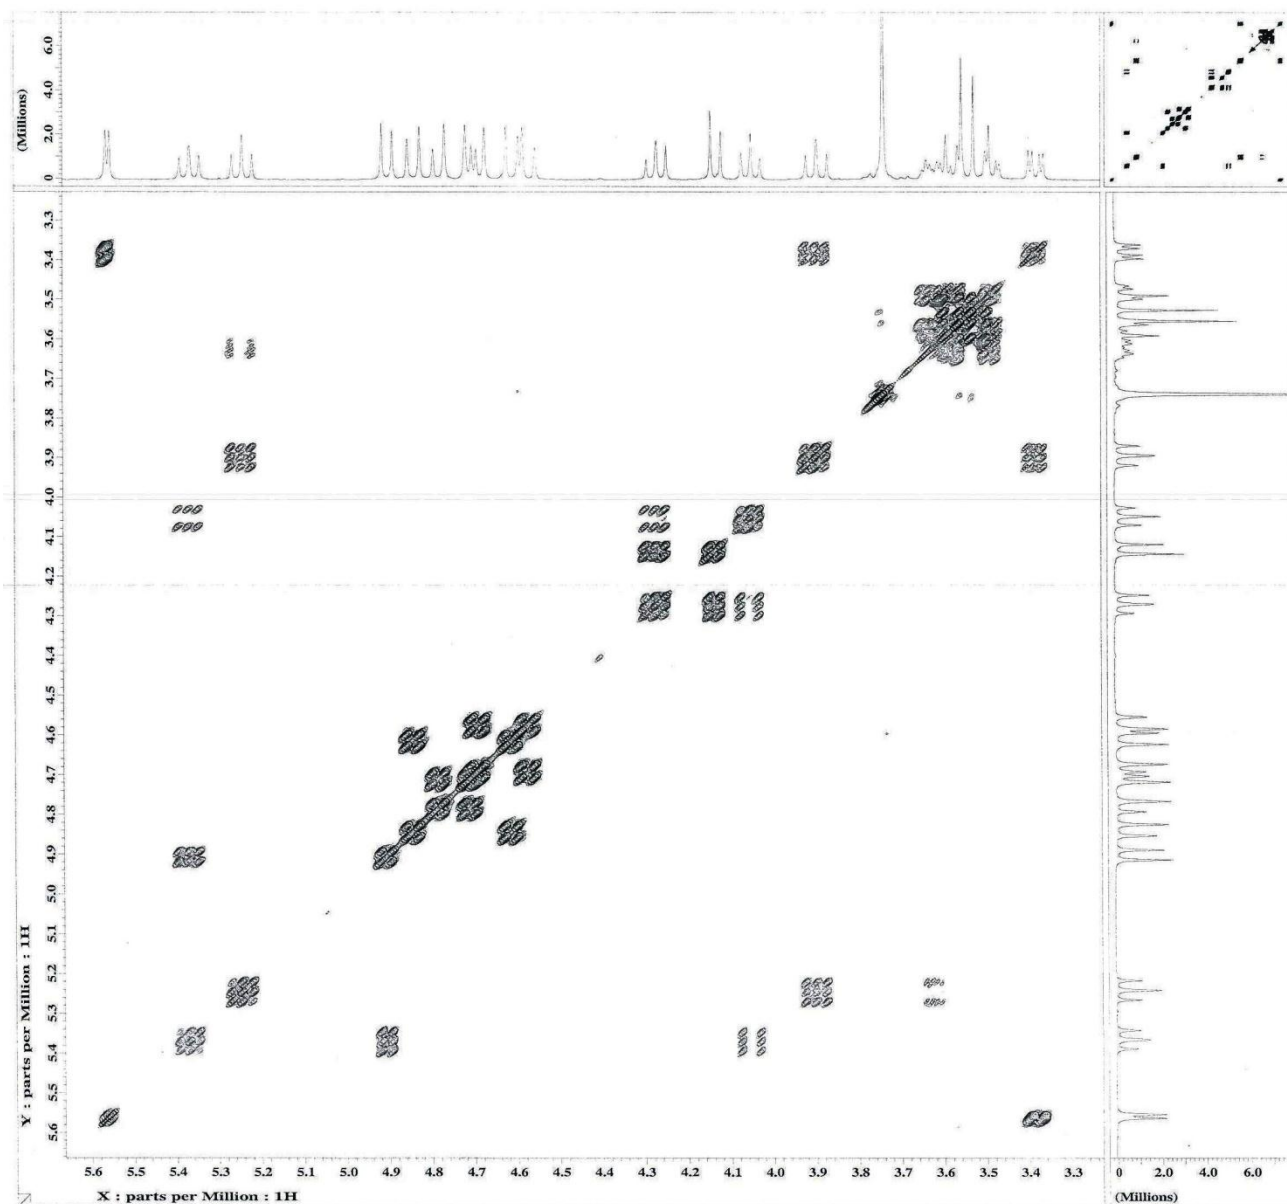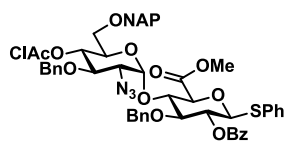

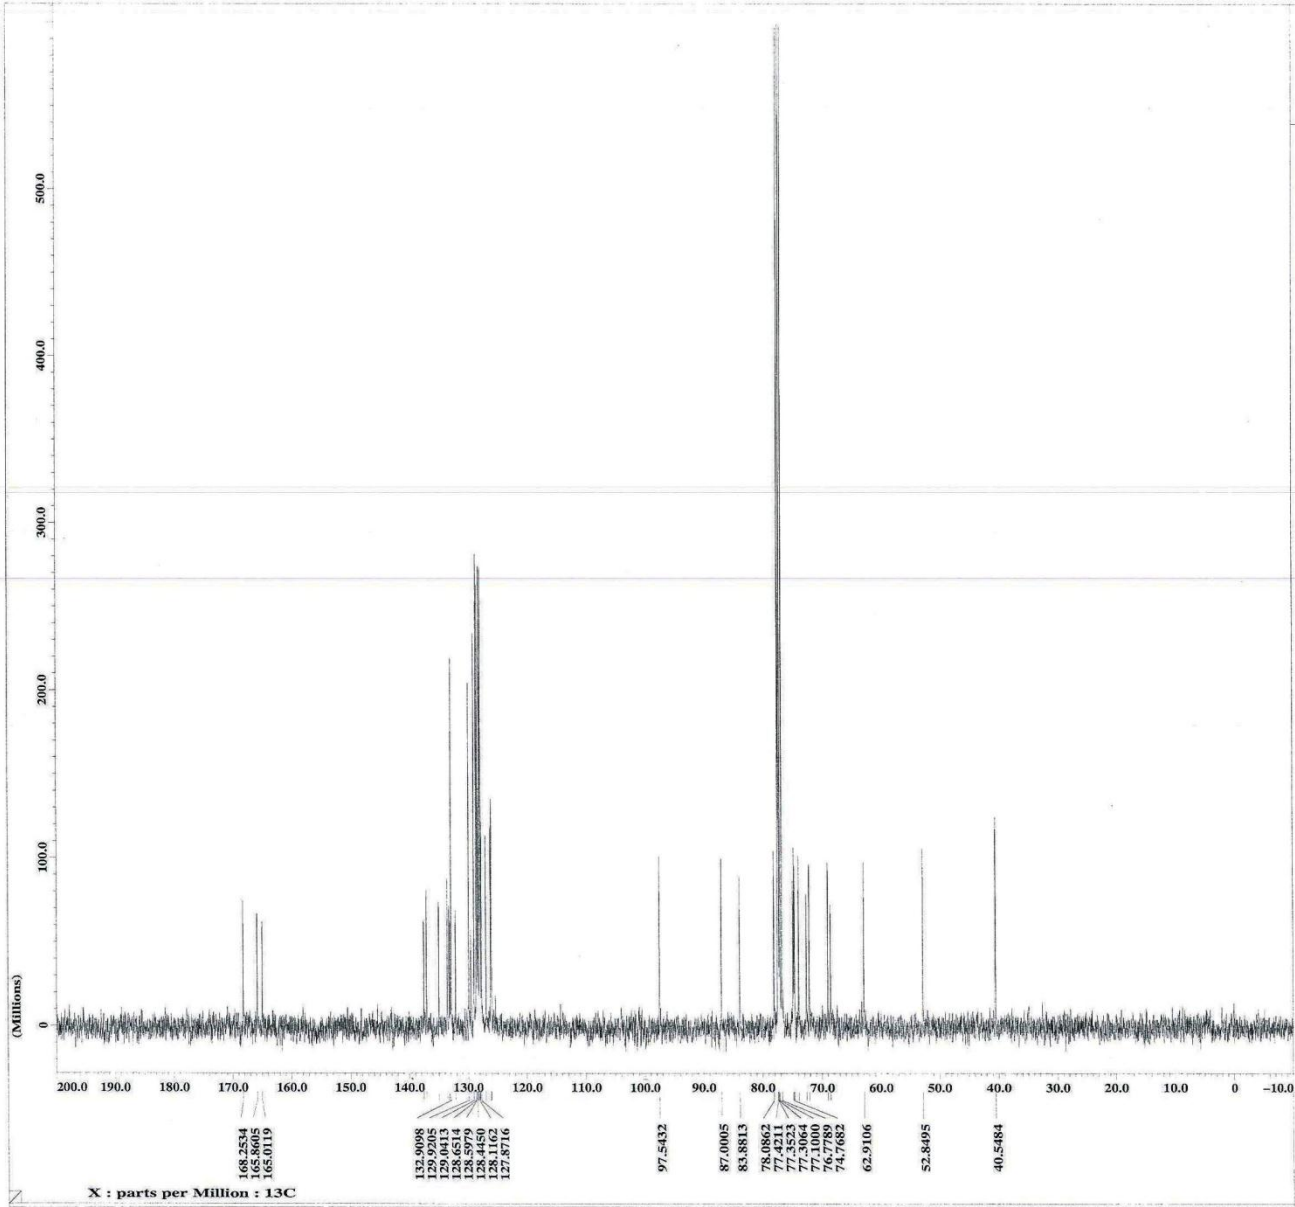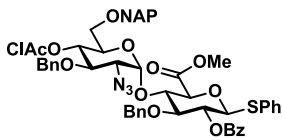



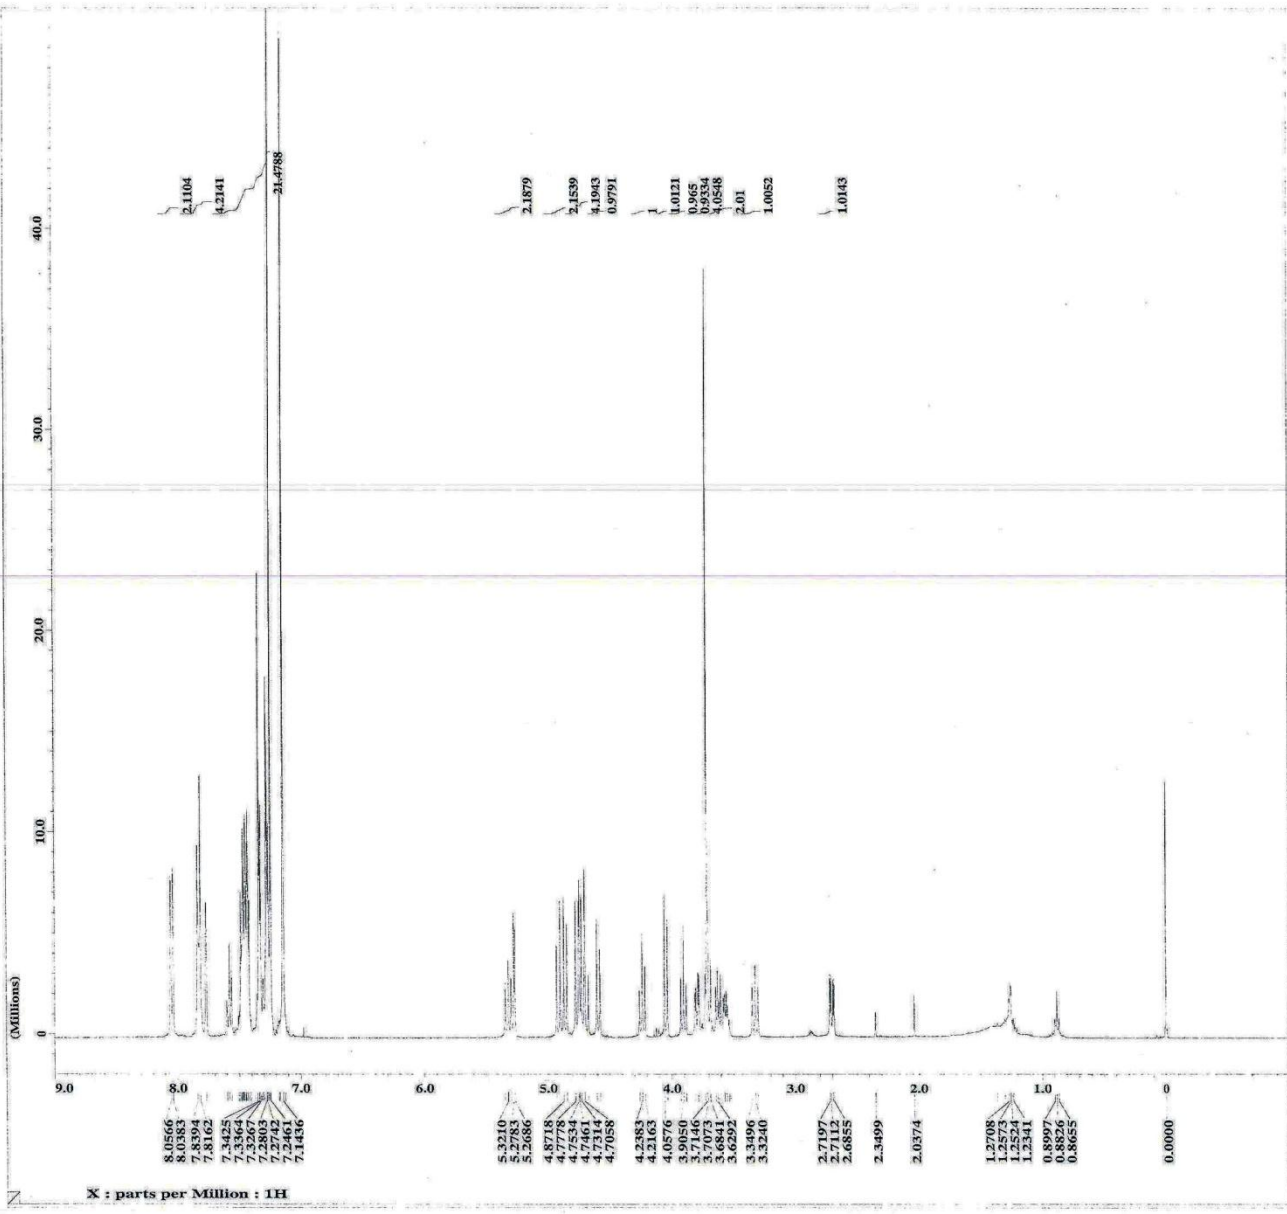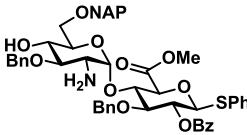



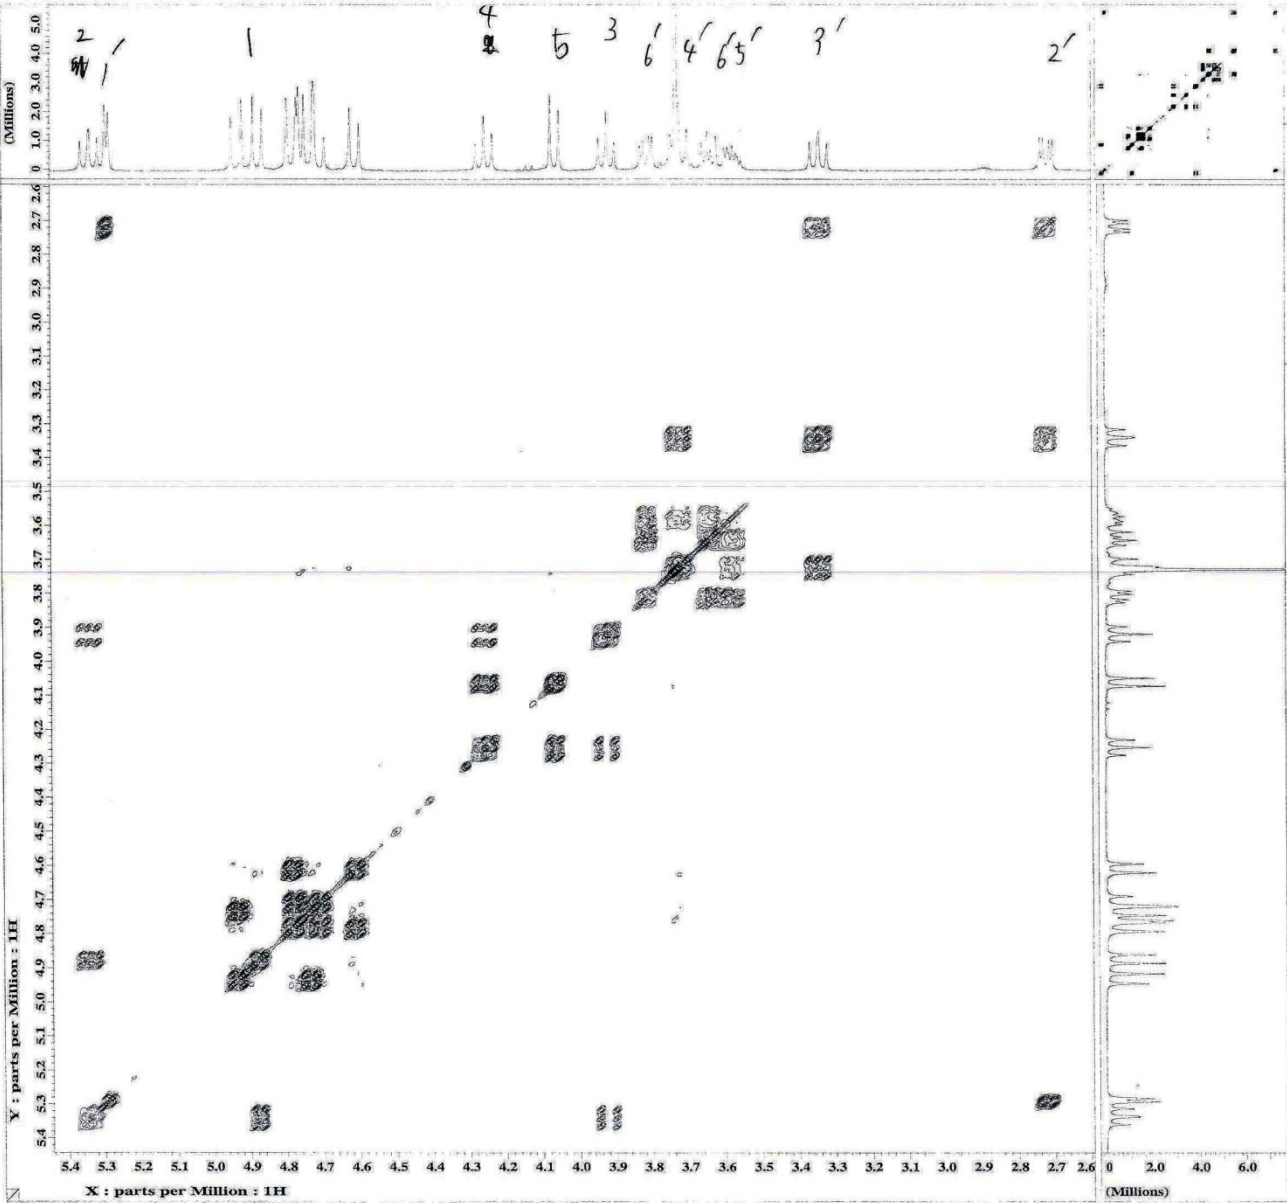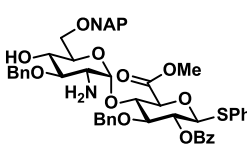

15

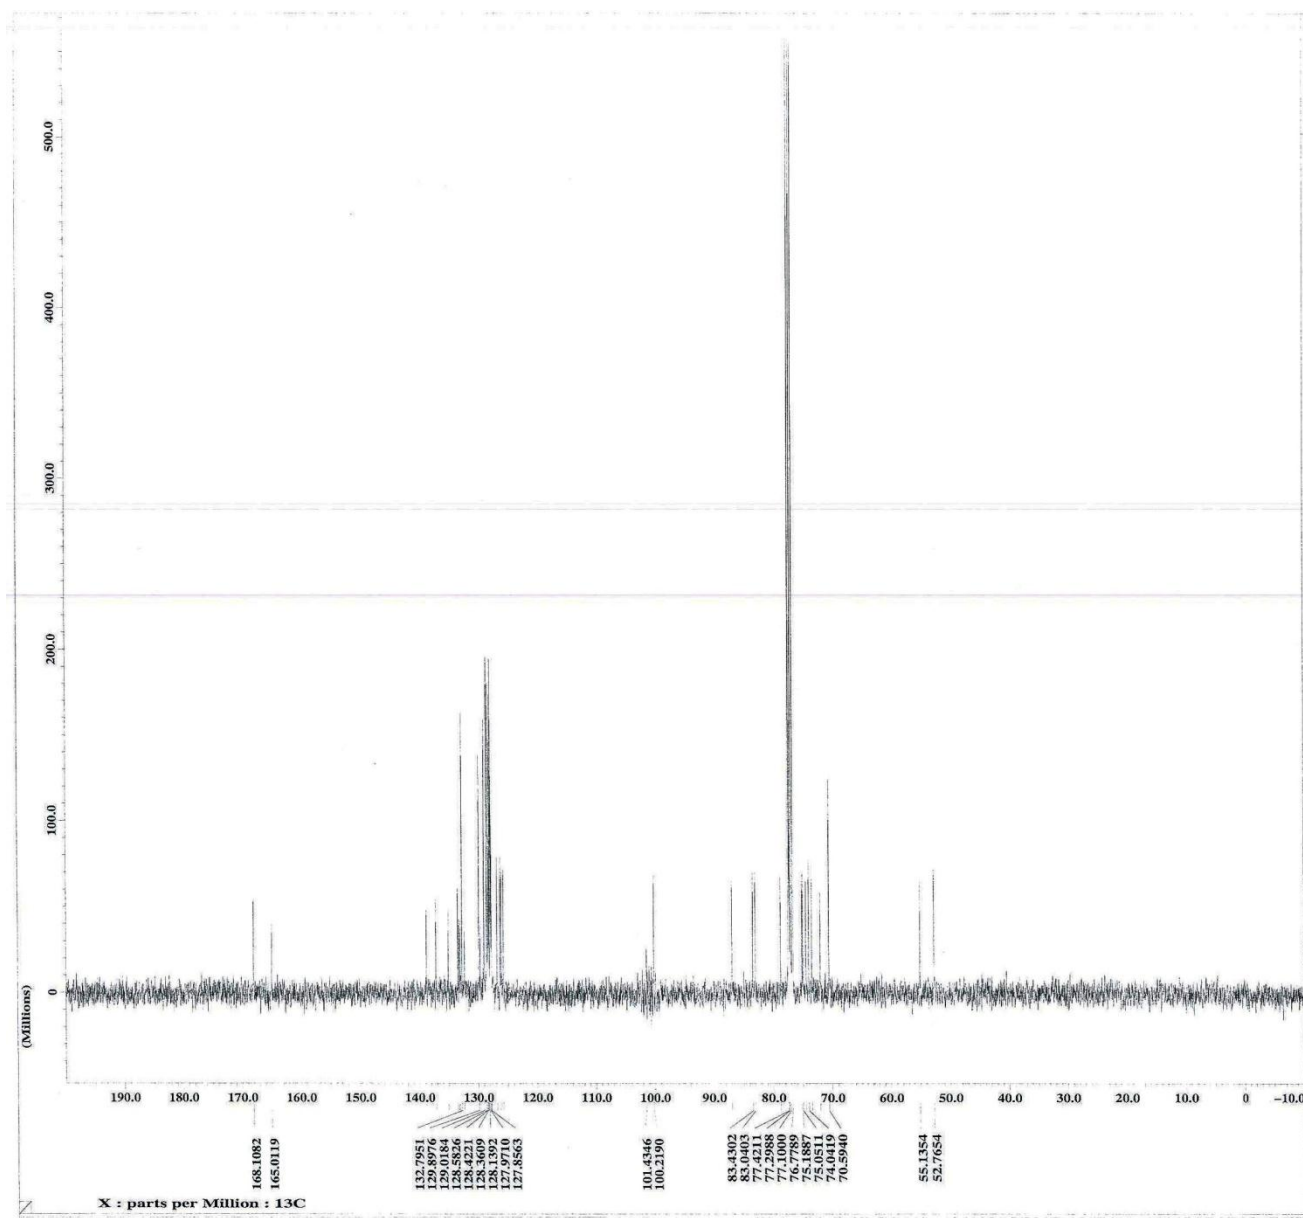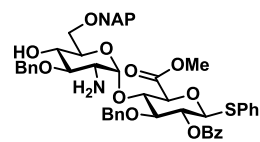

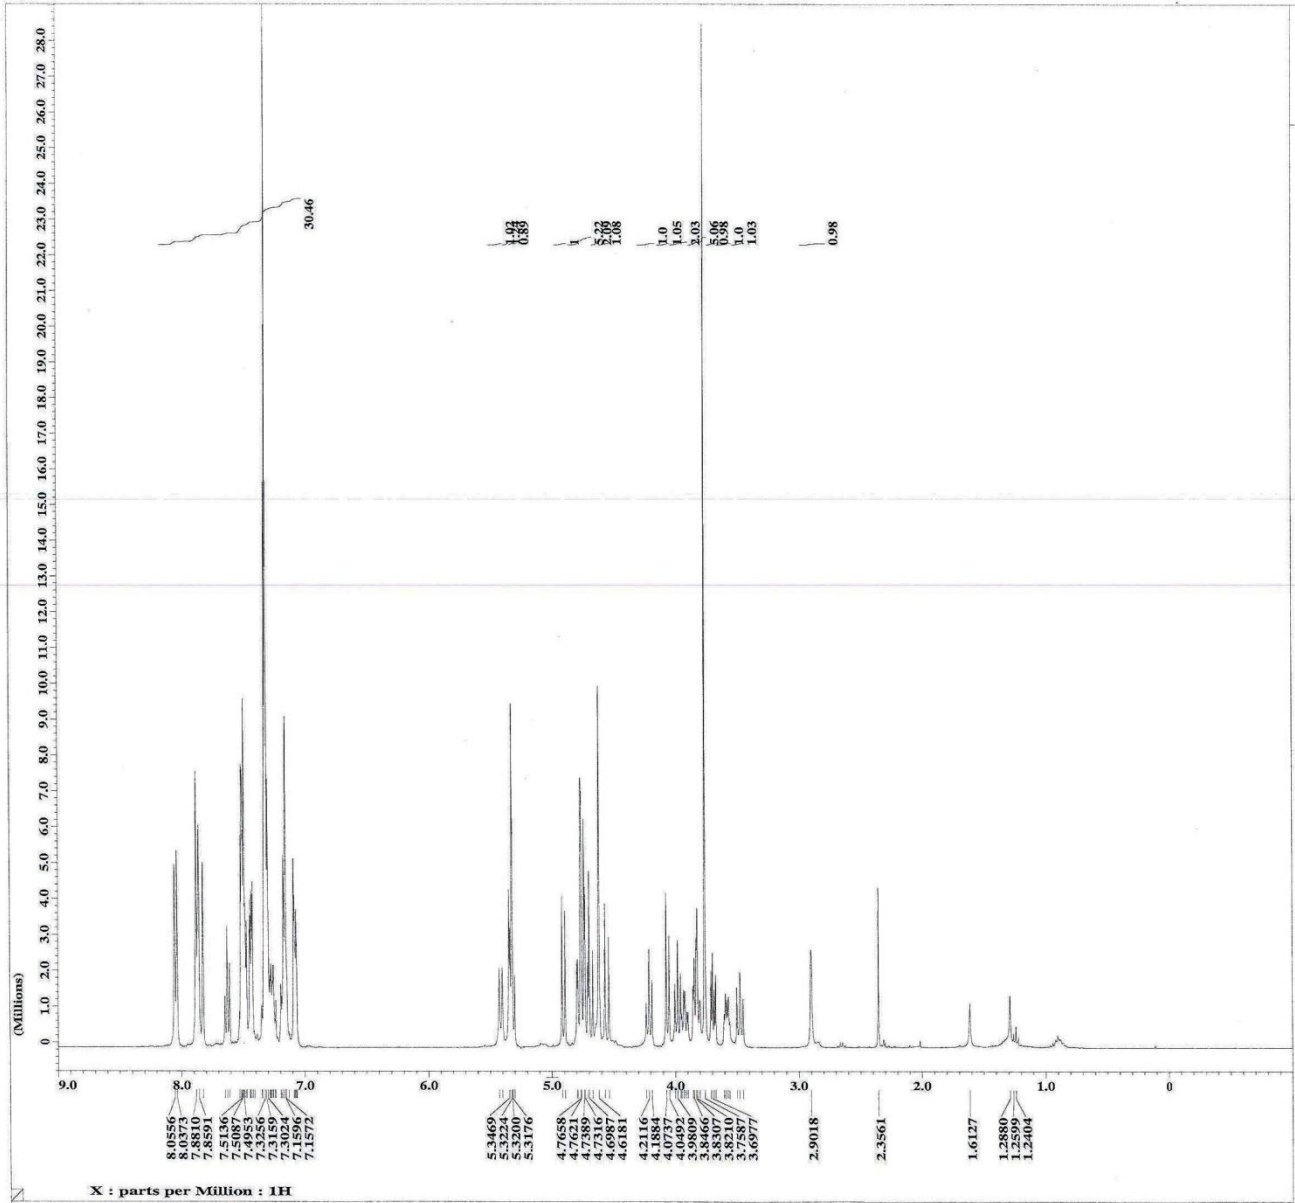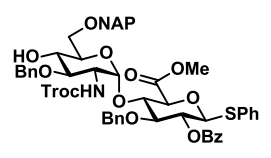

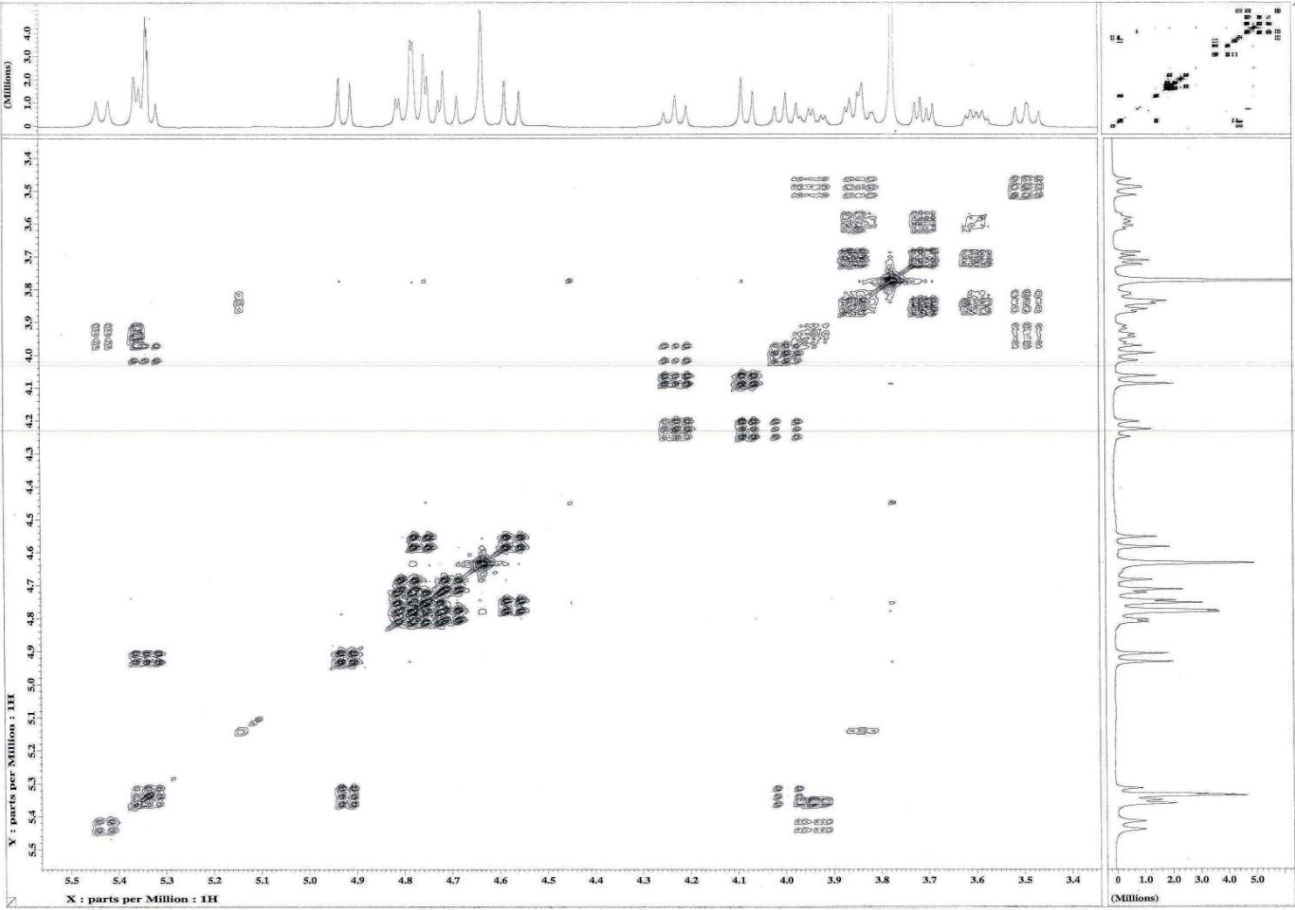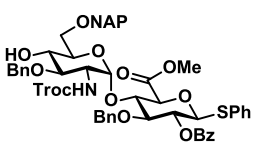

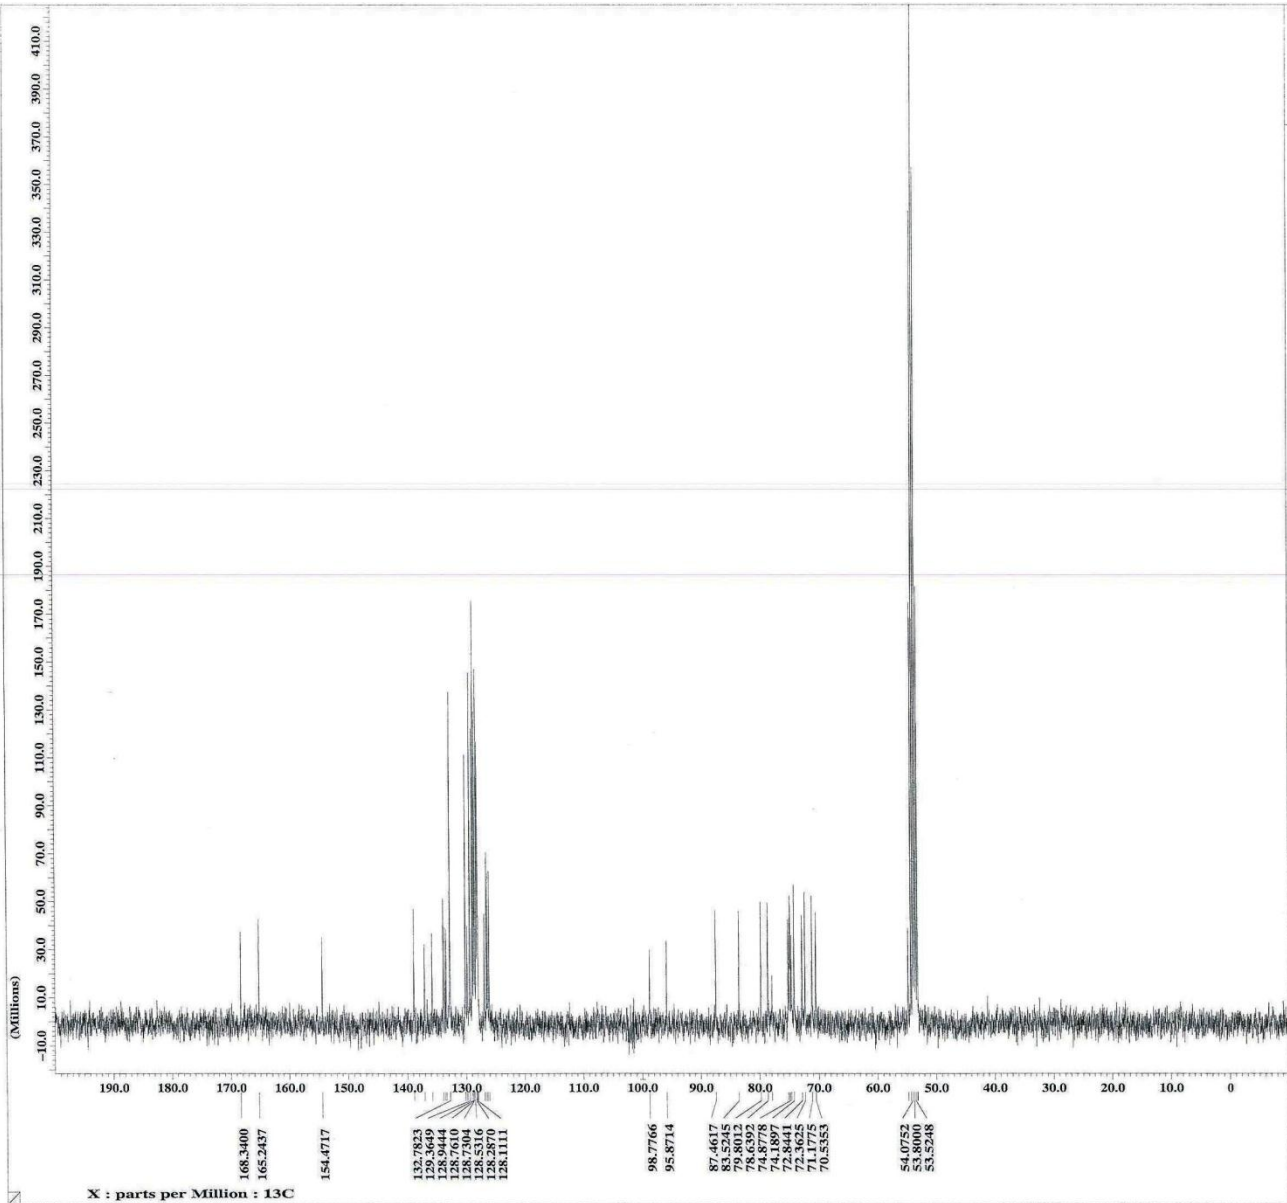

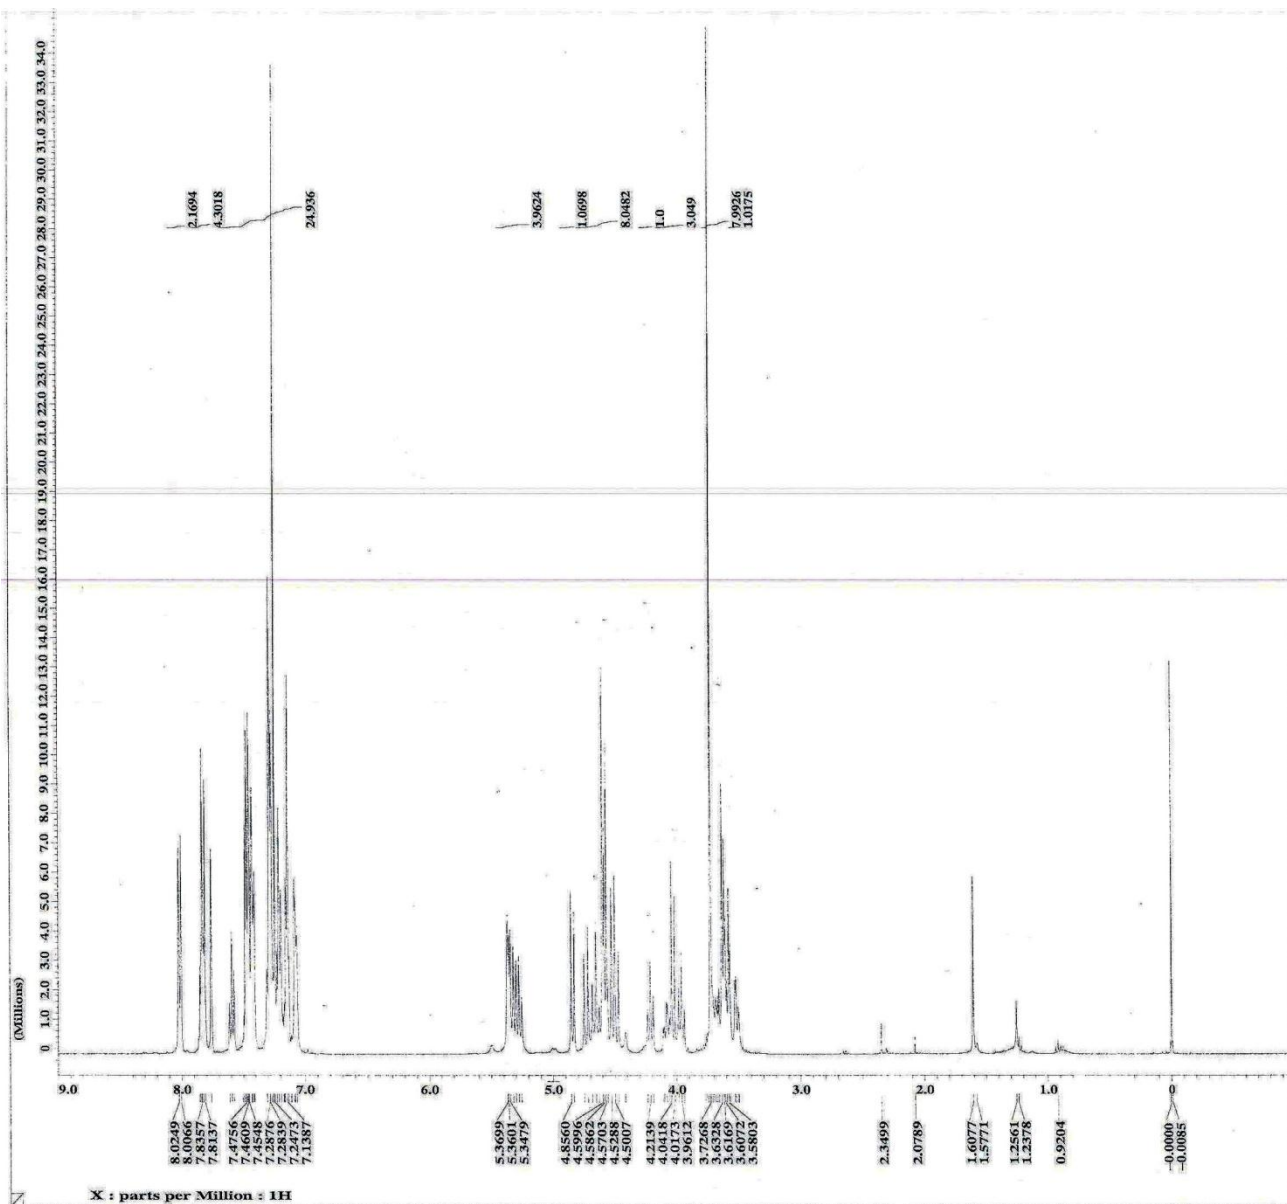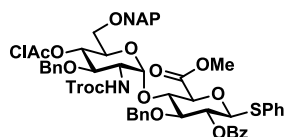

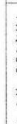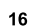



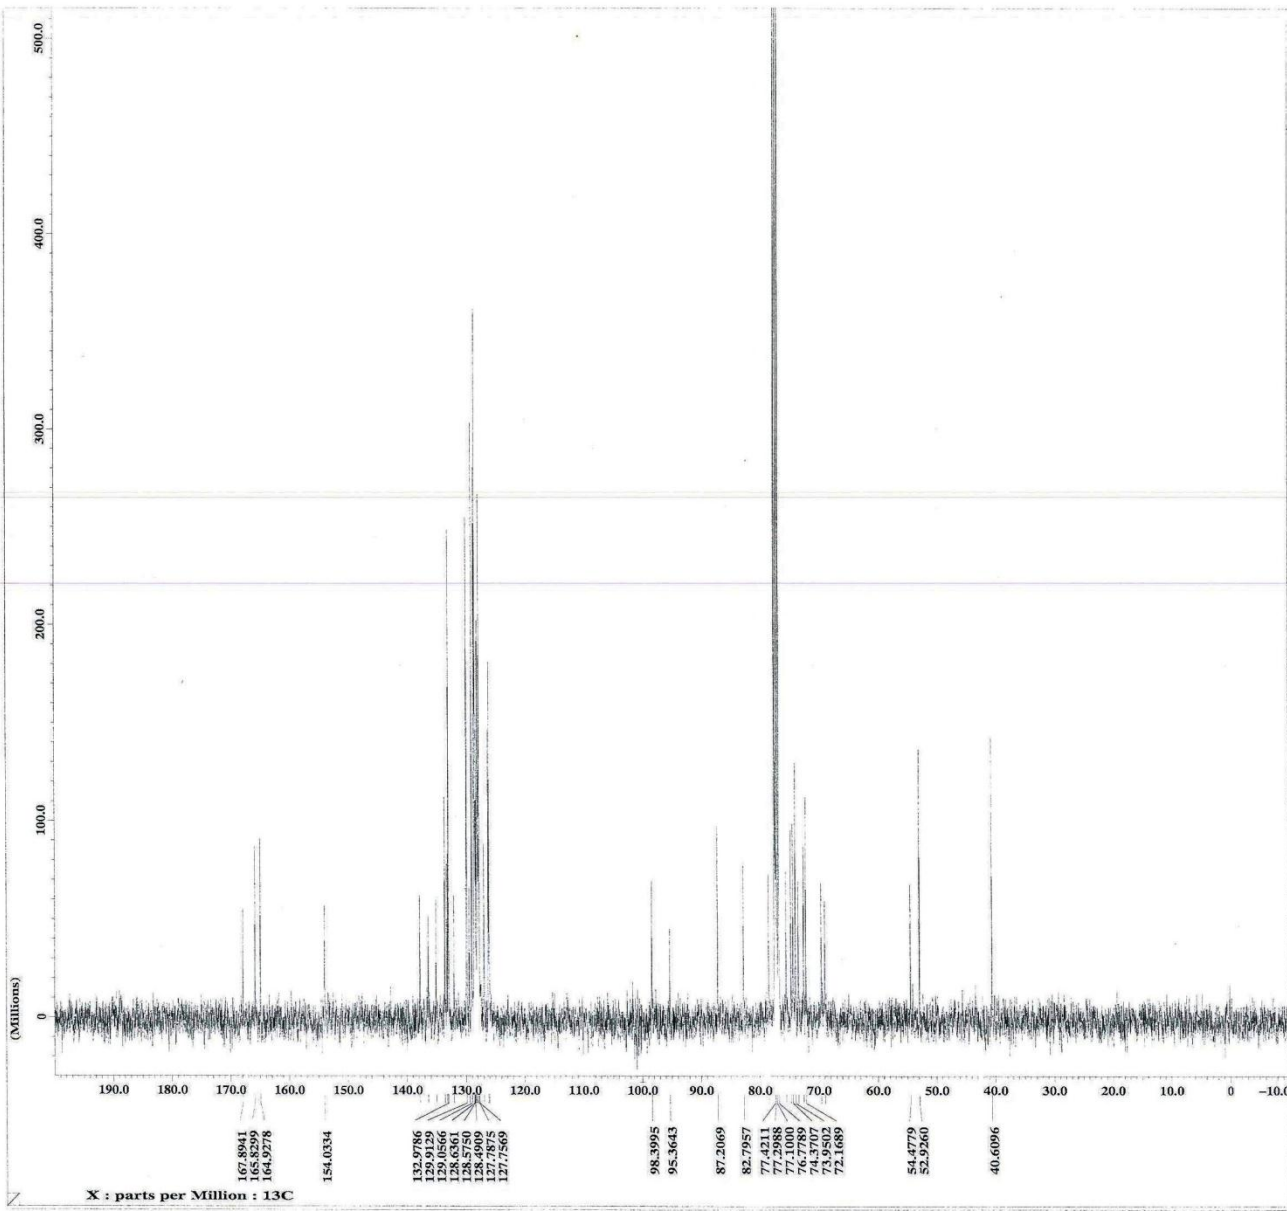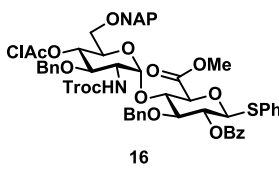

16



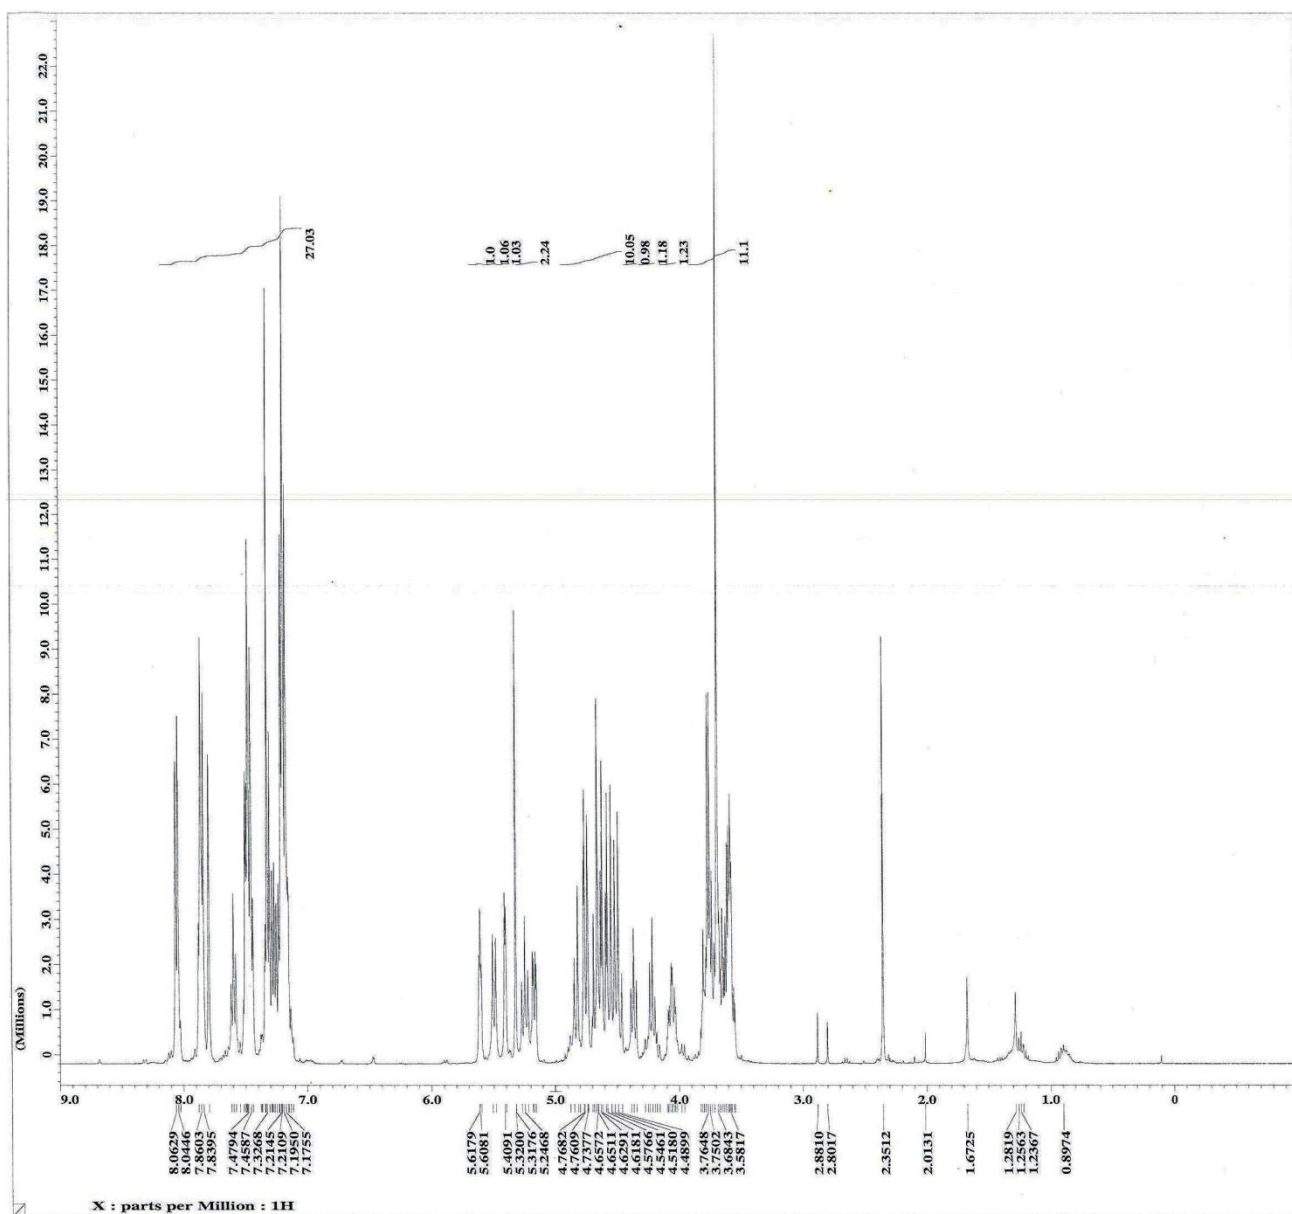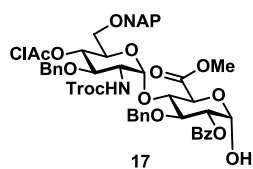

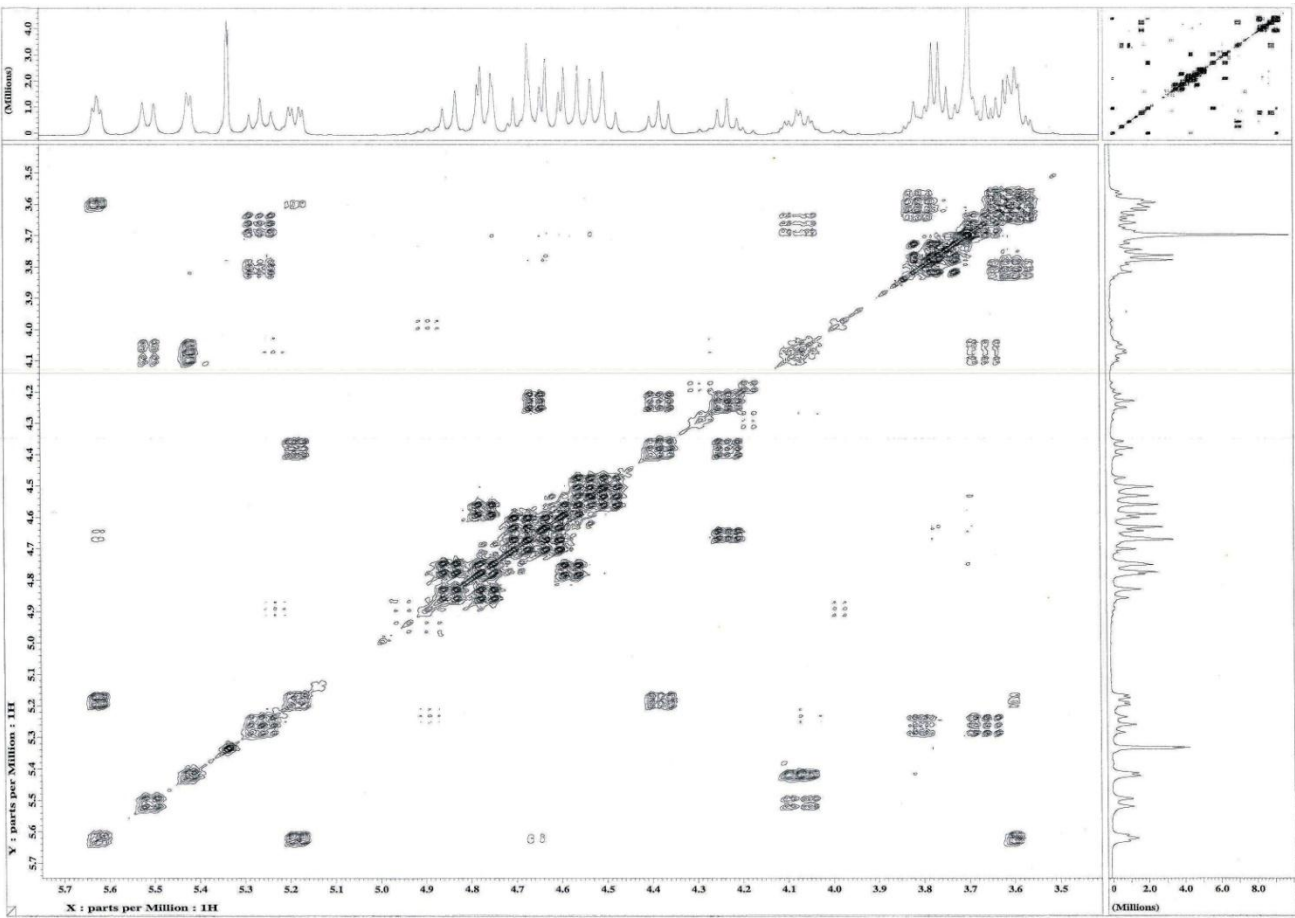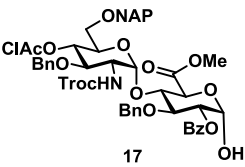

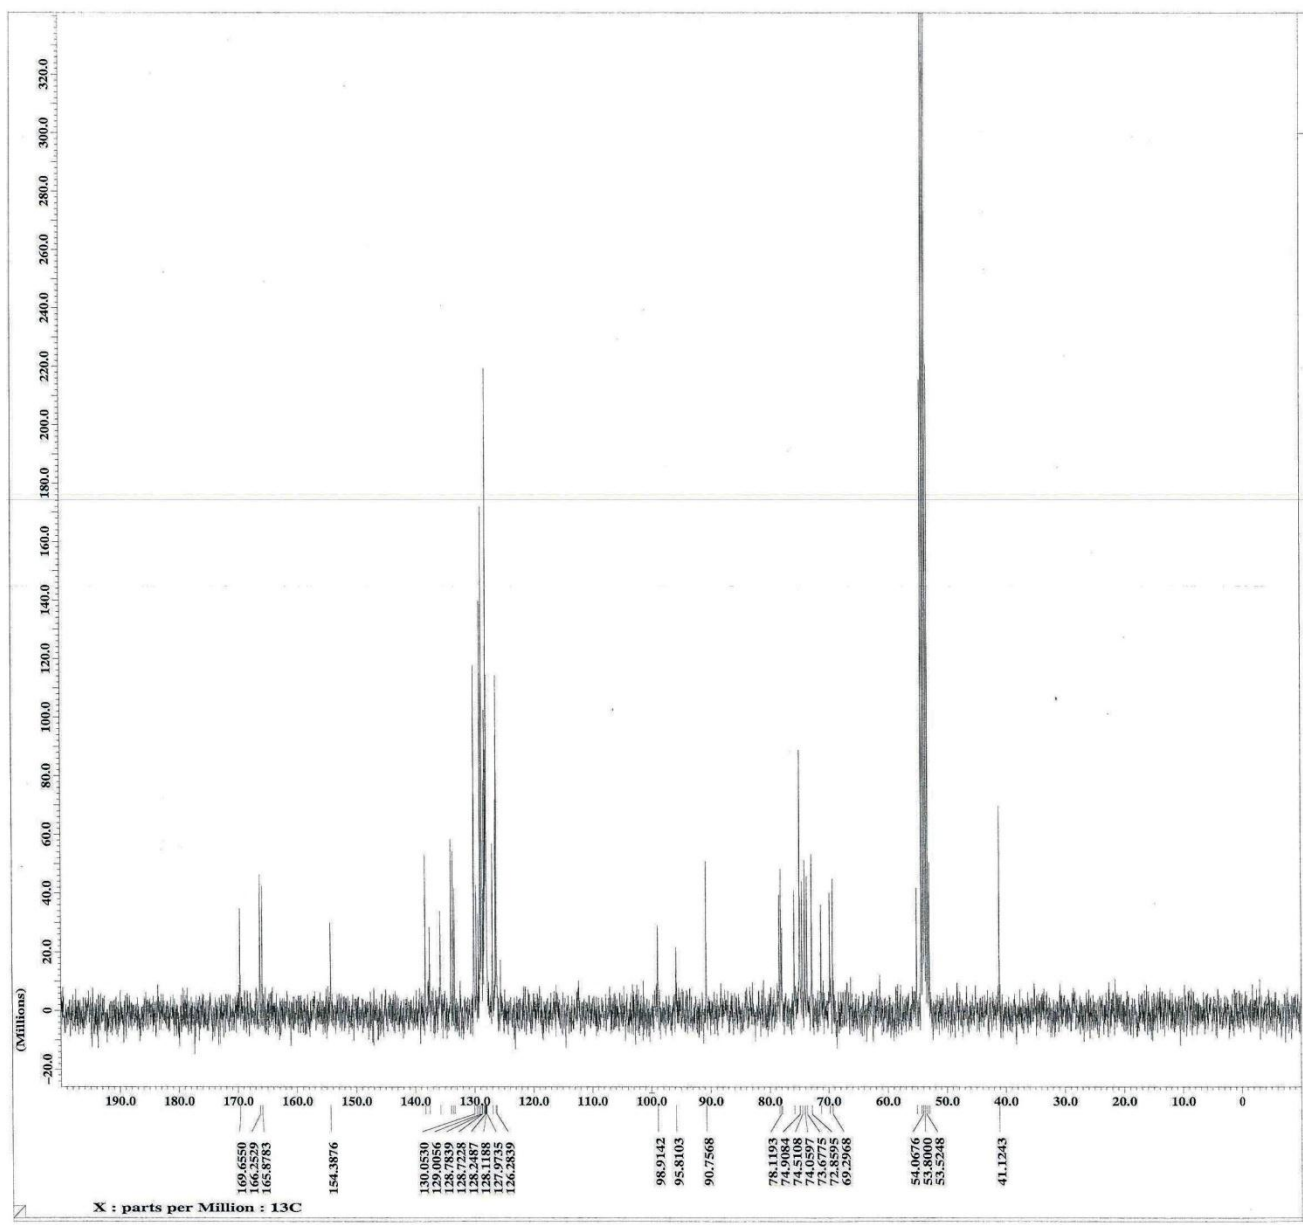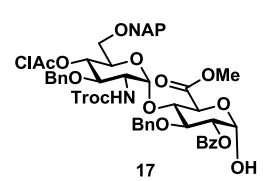

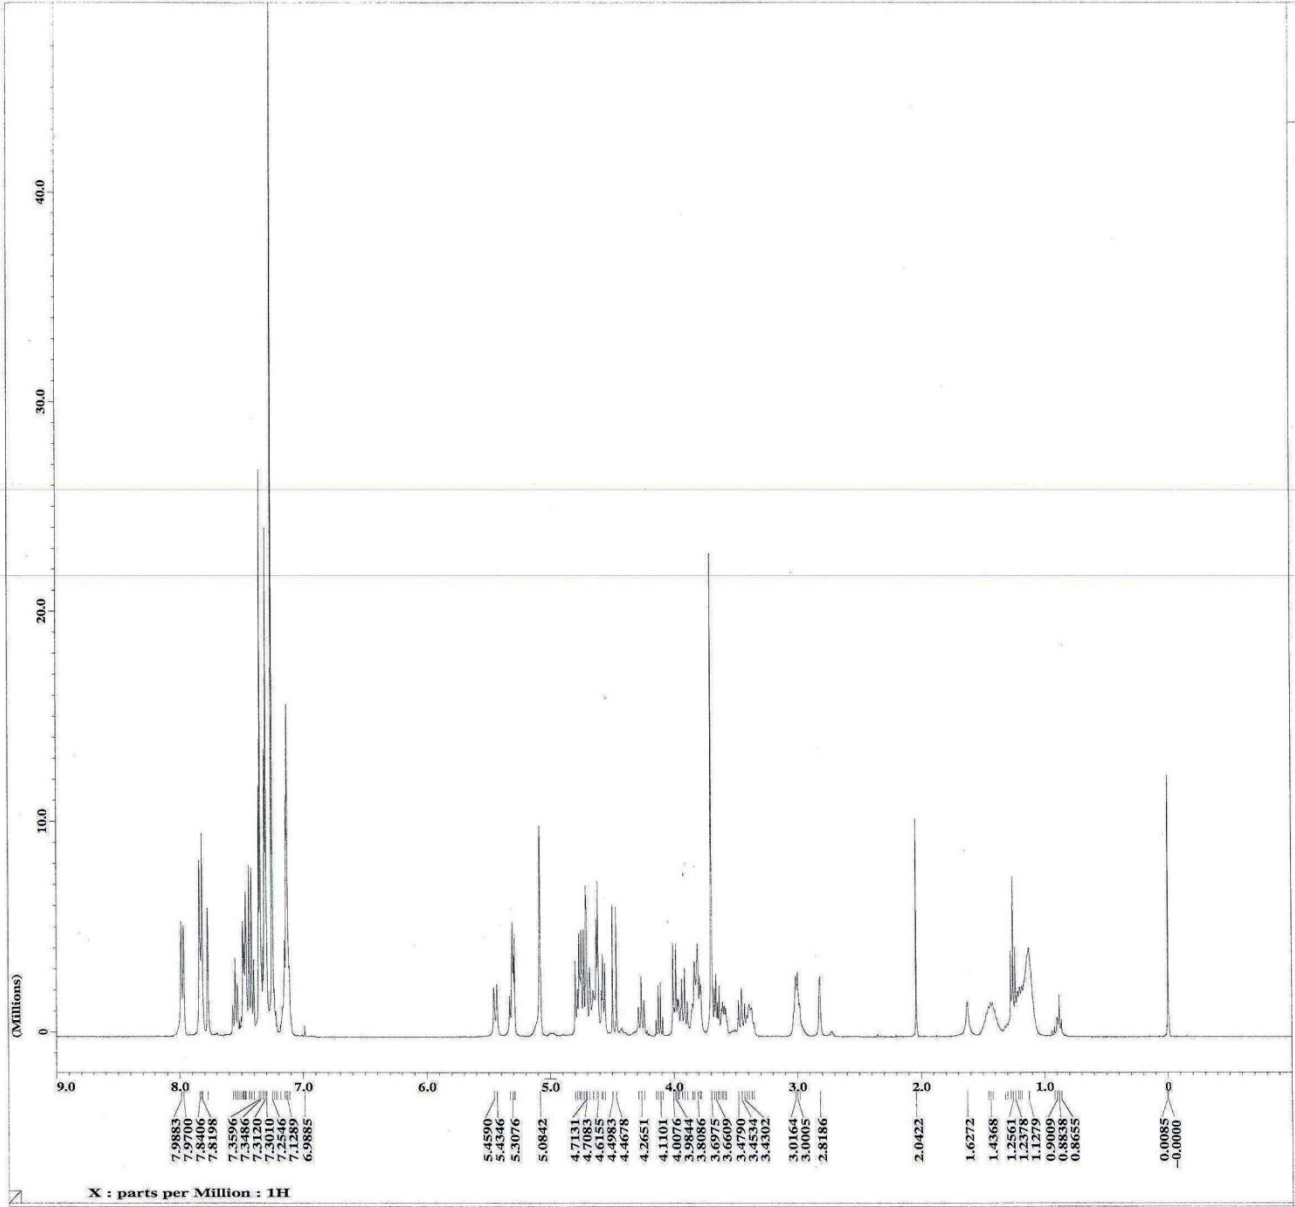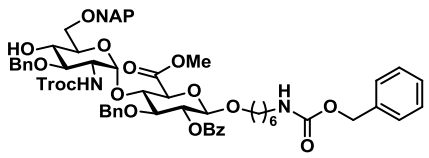

18

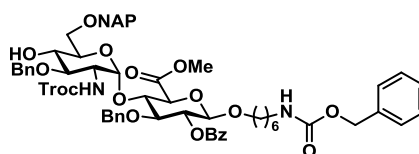

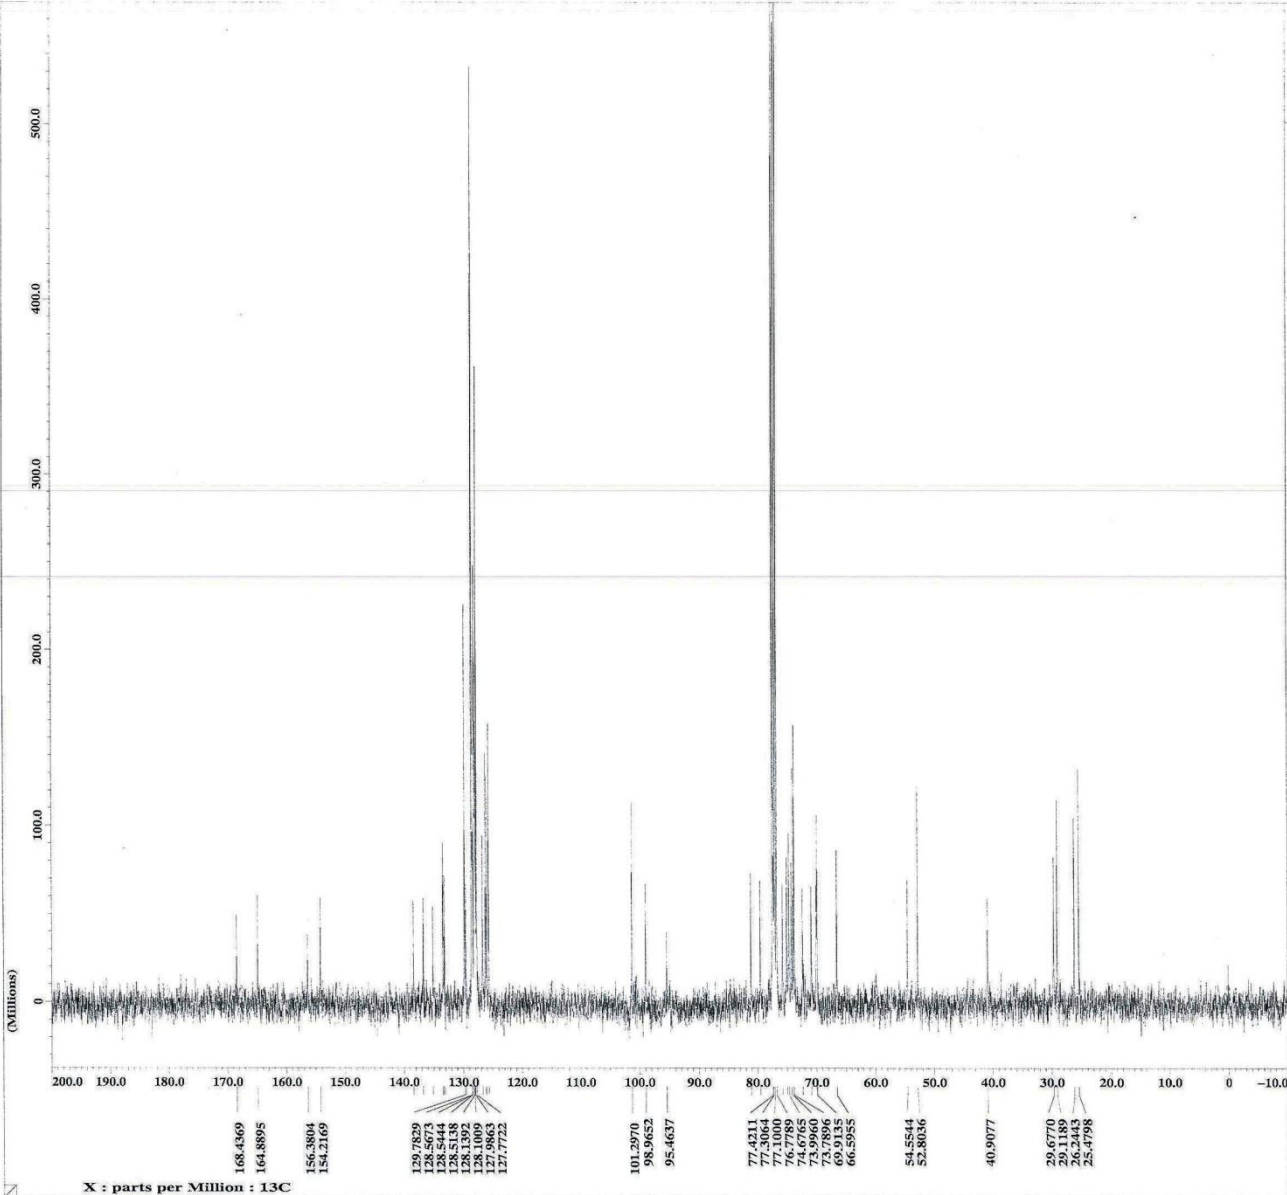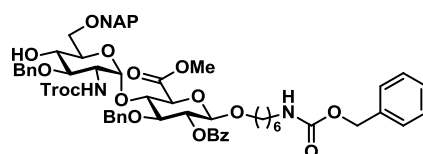

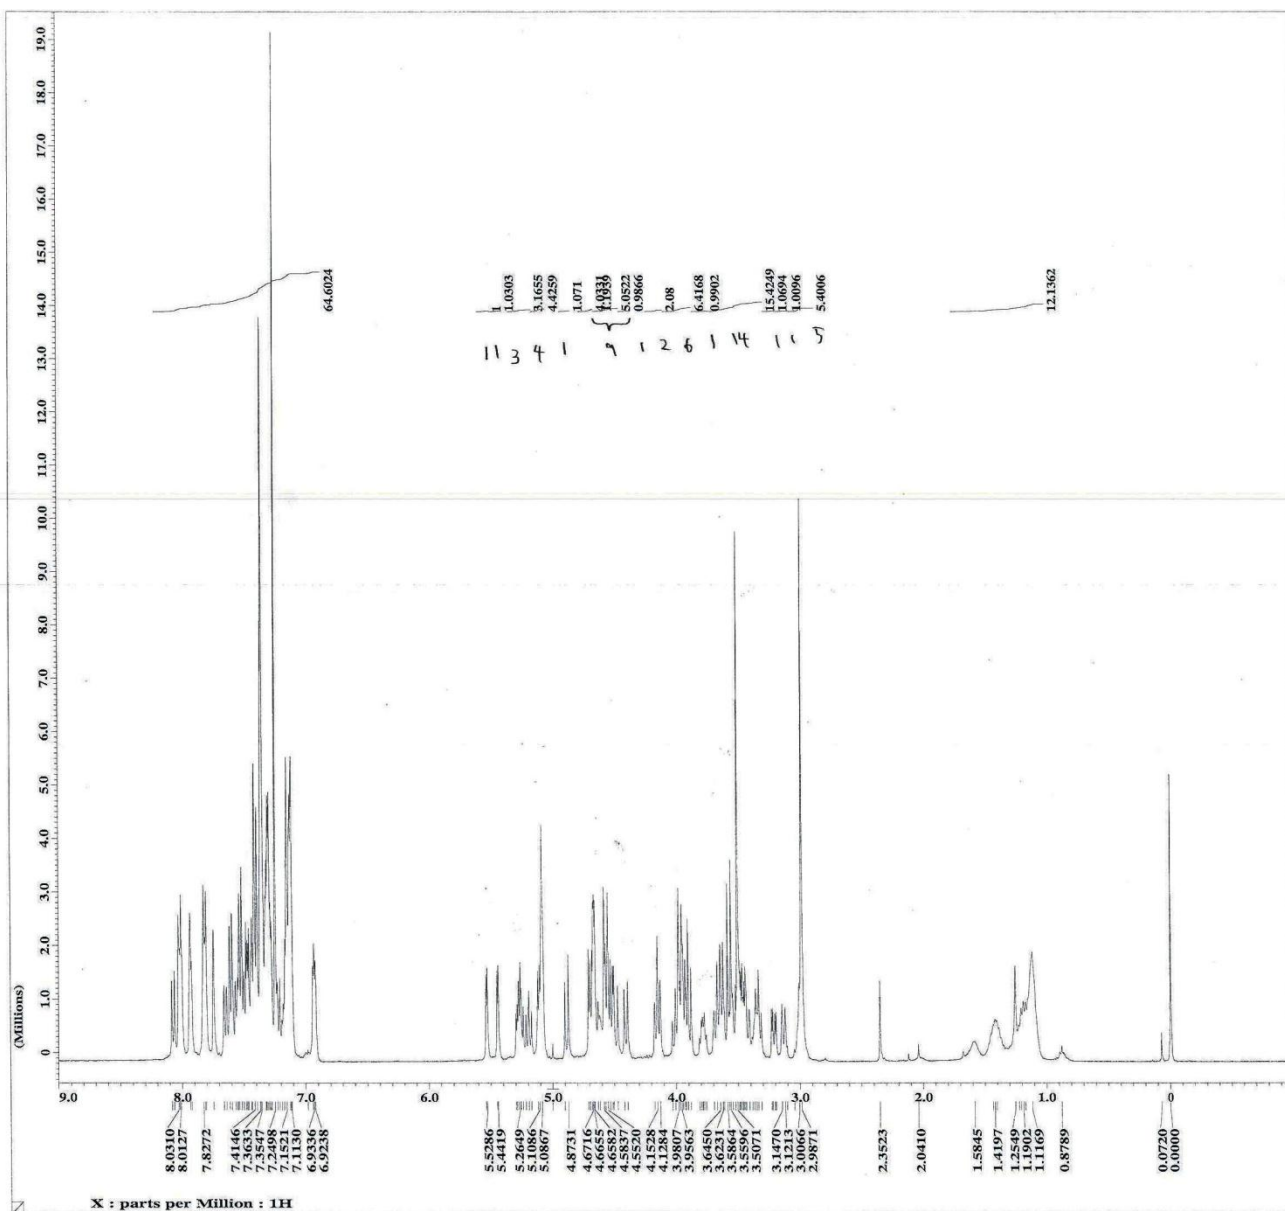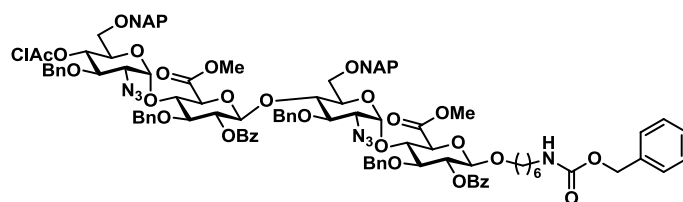



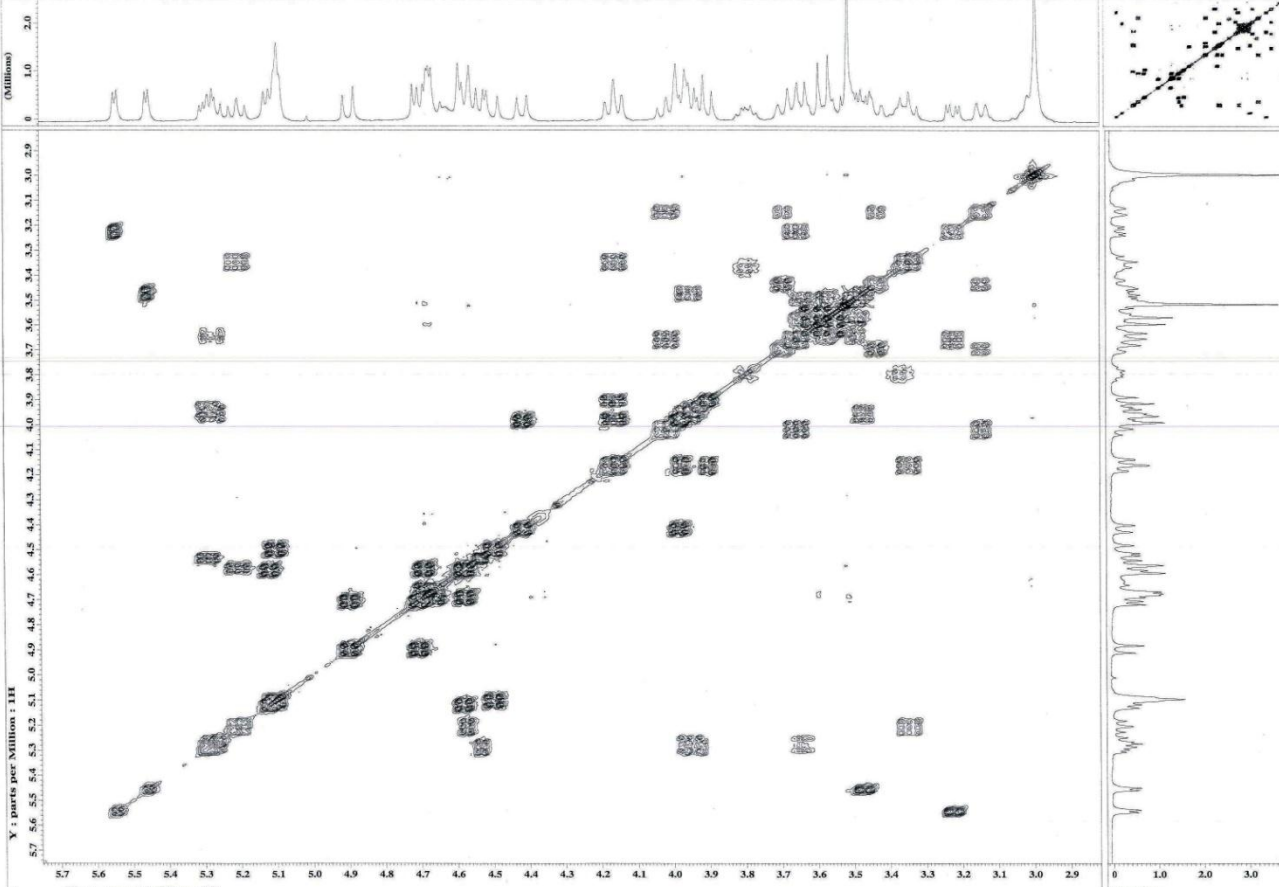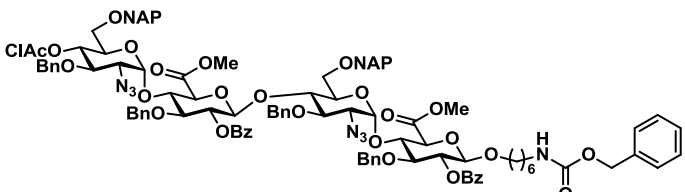



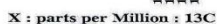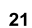

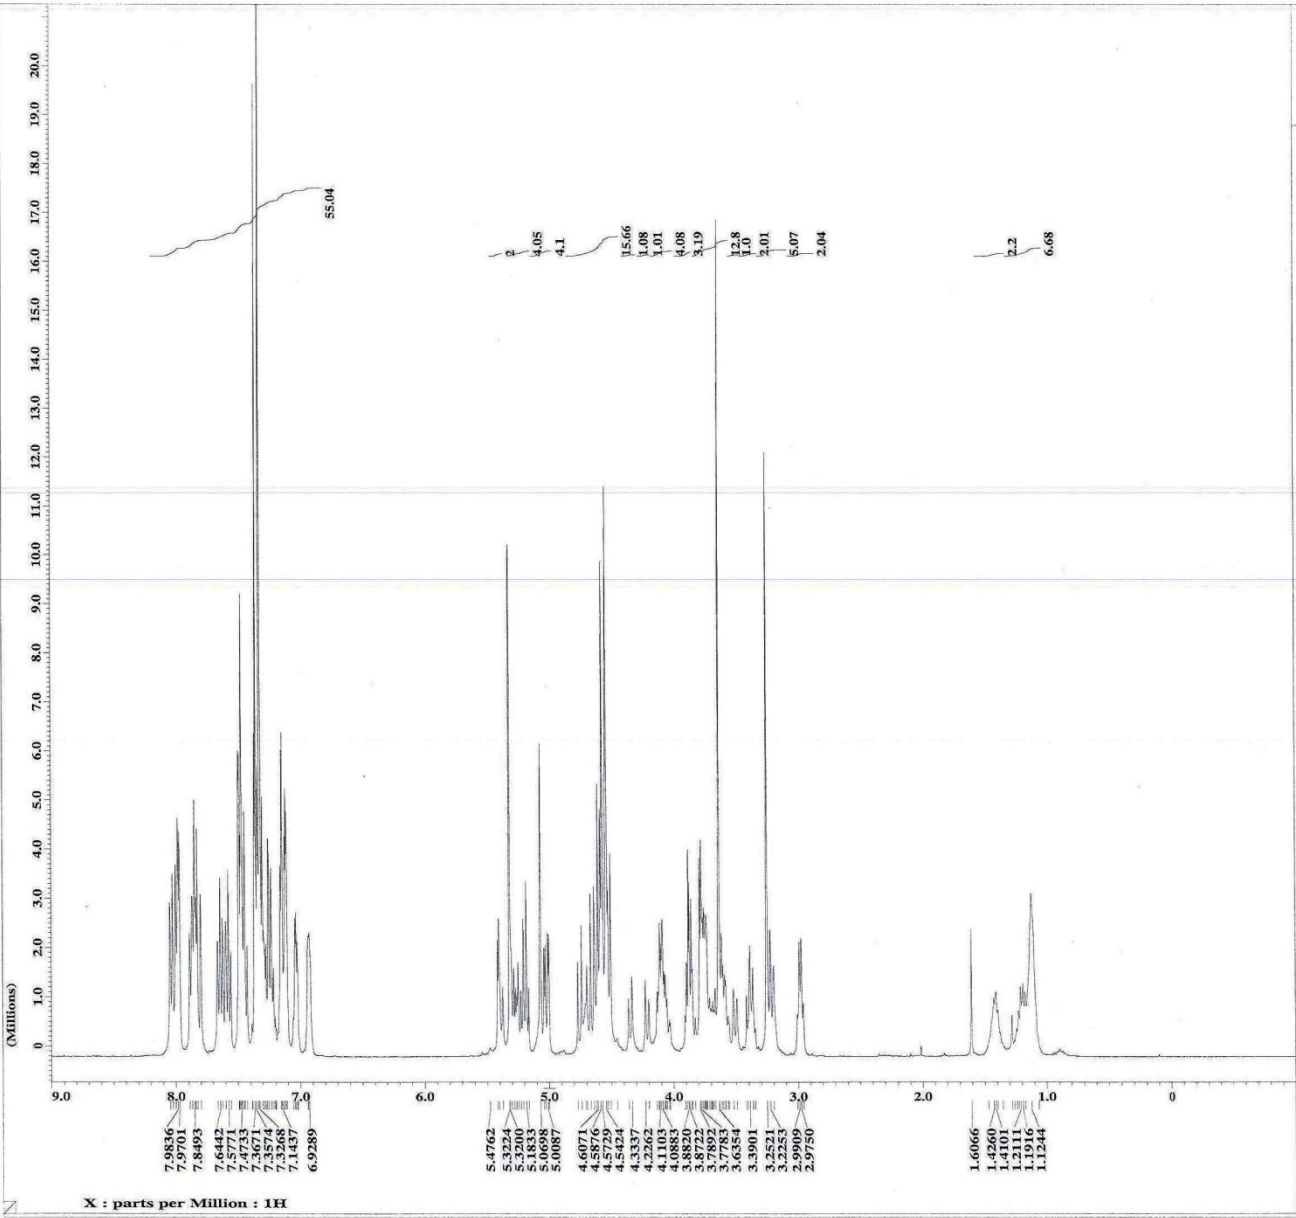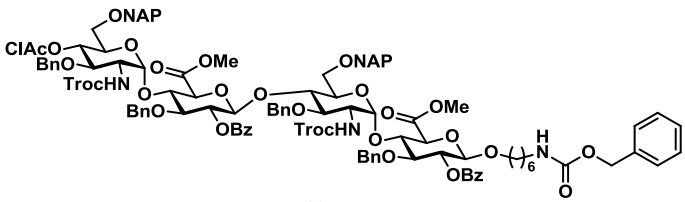

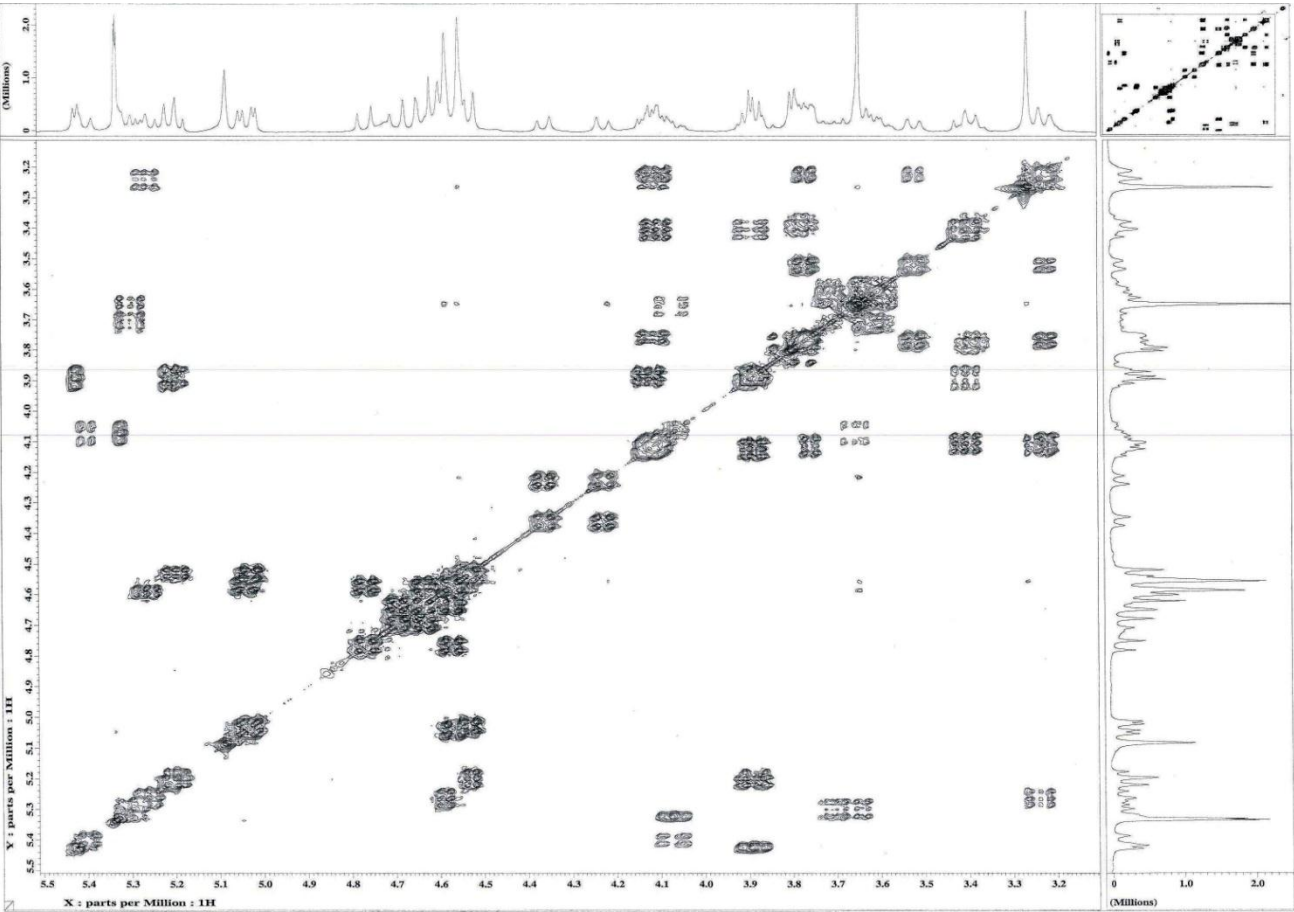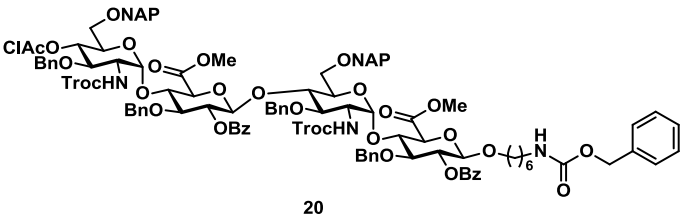

20

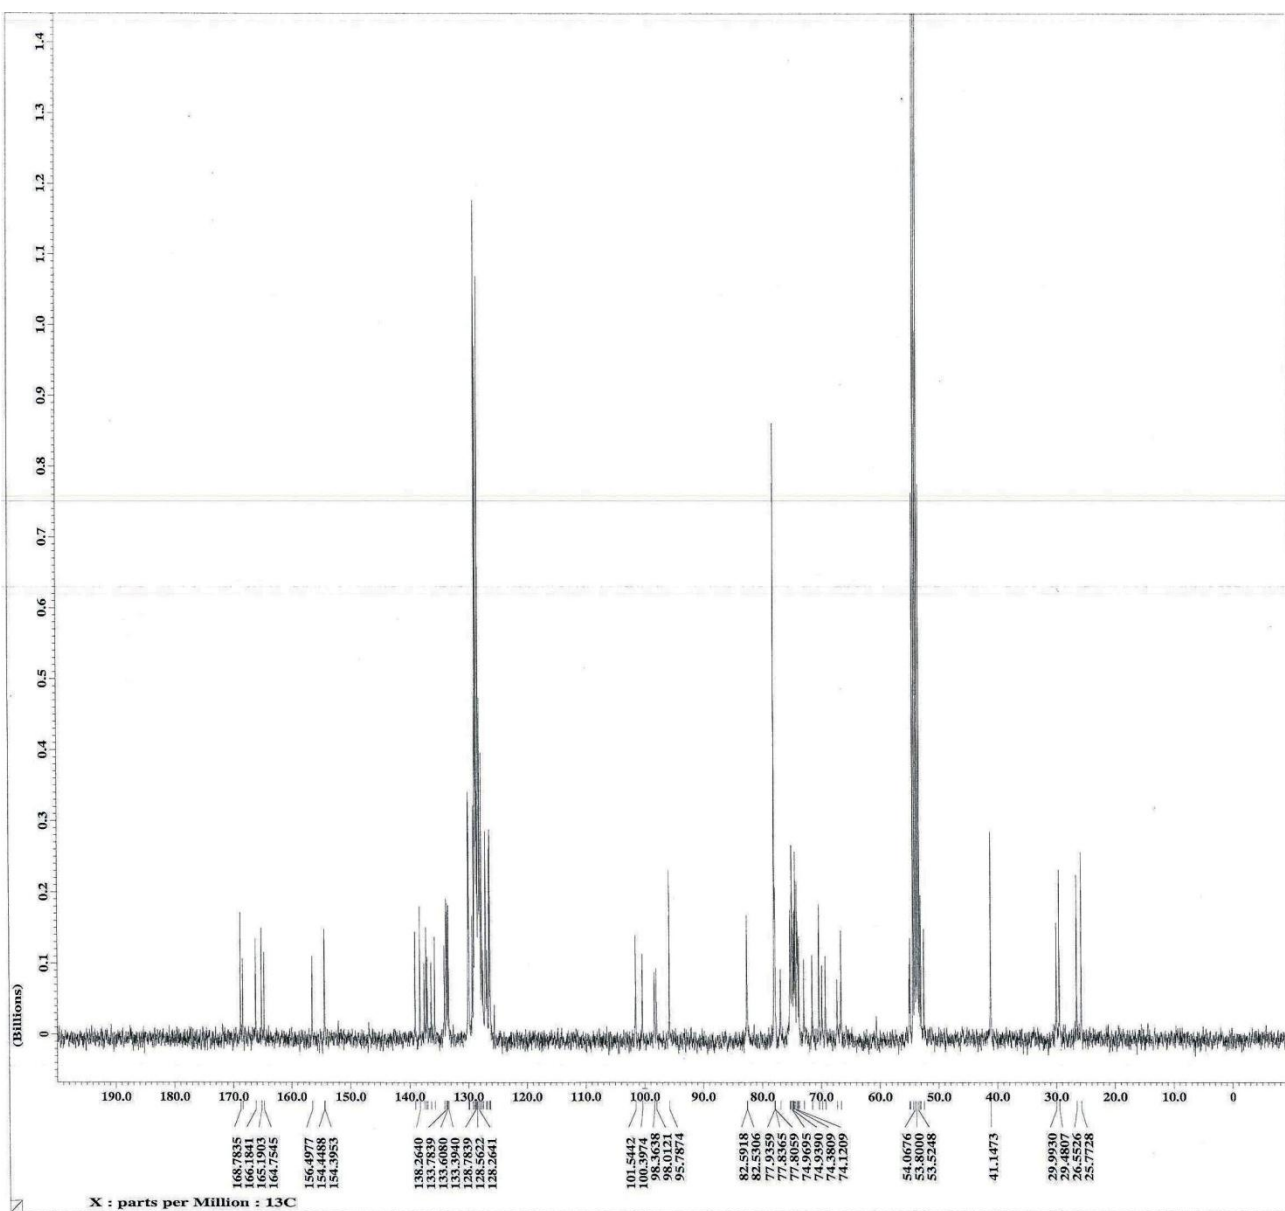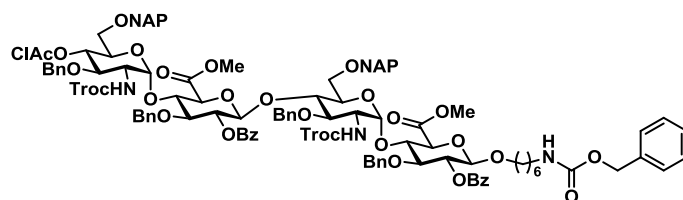



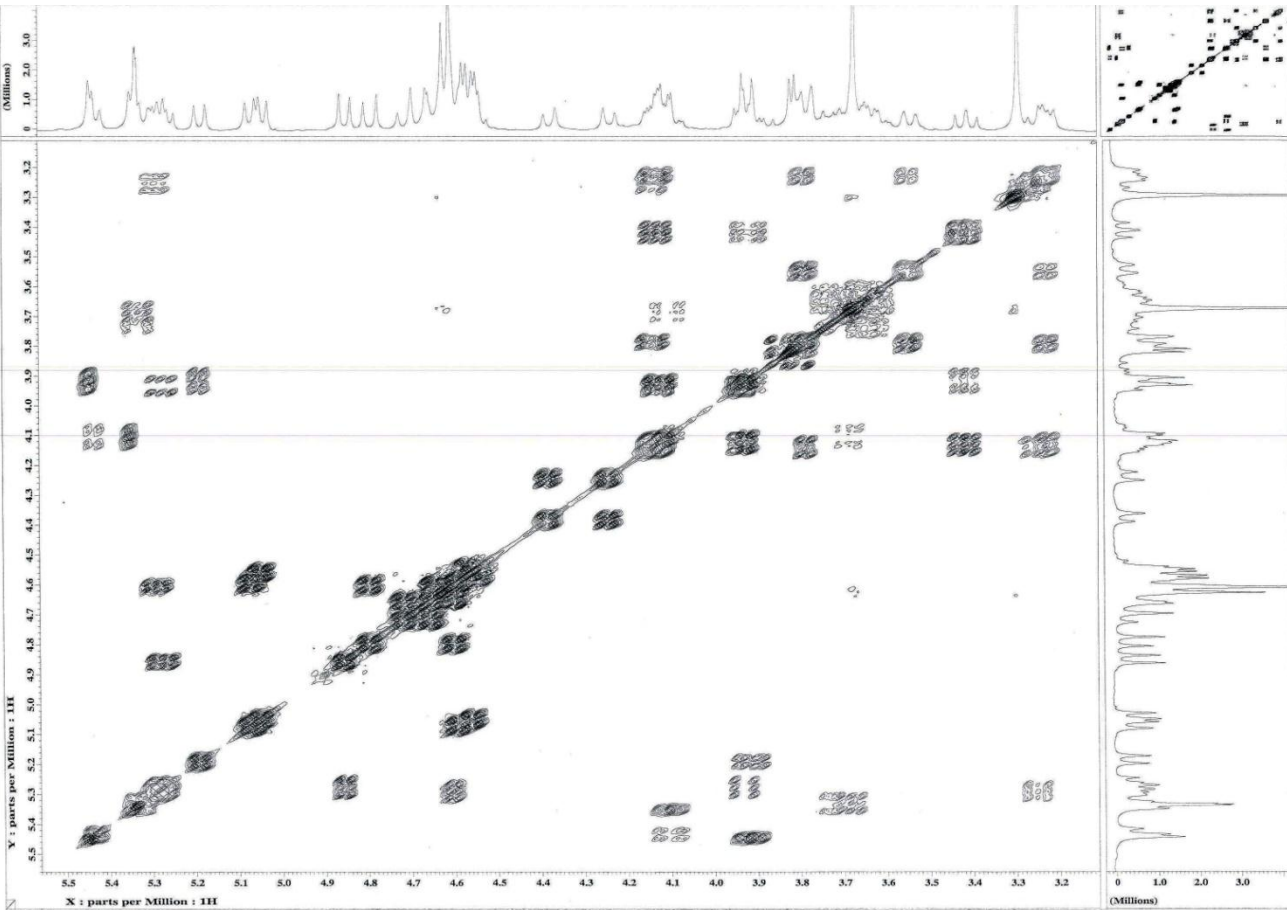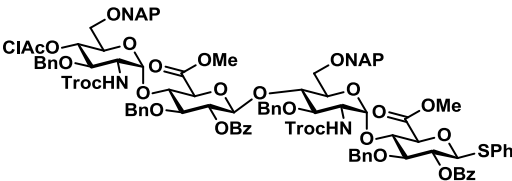





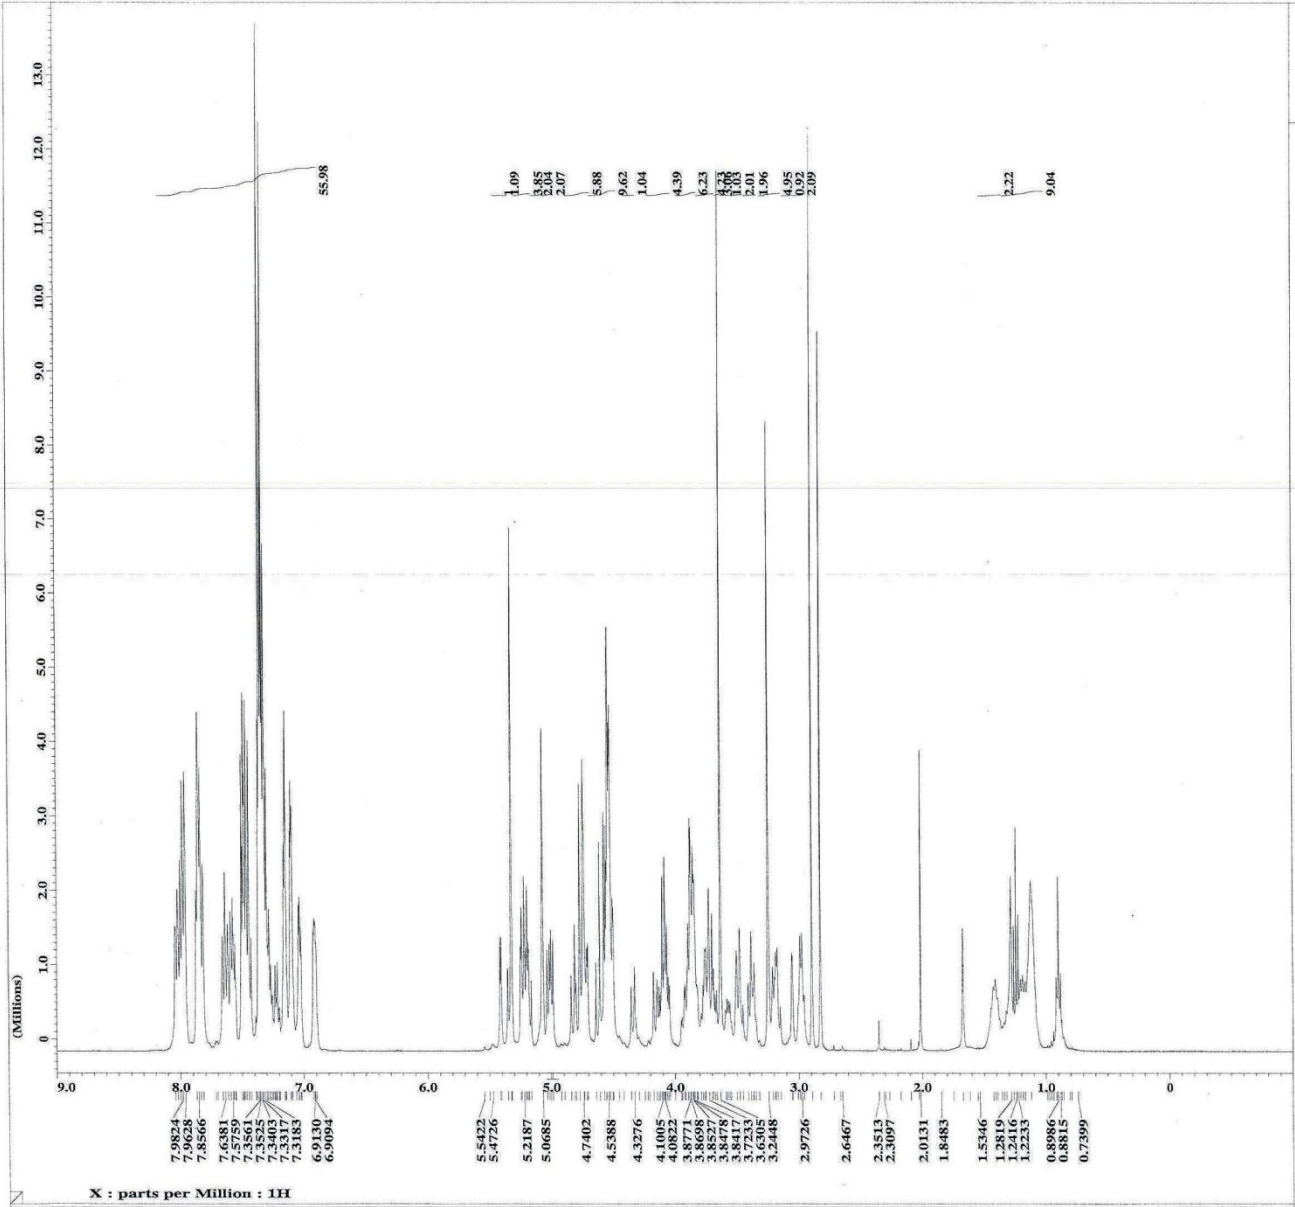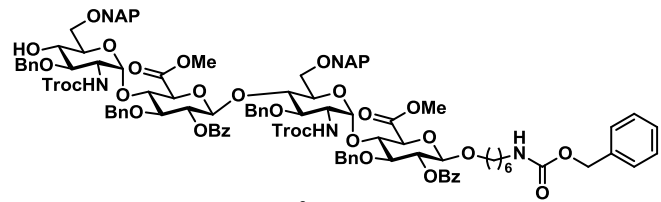



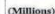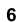

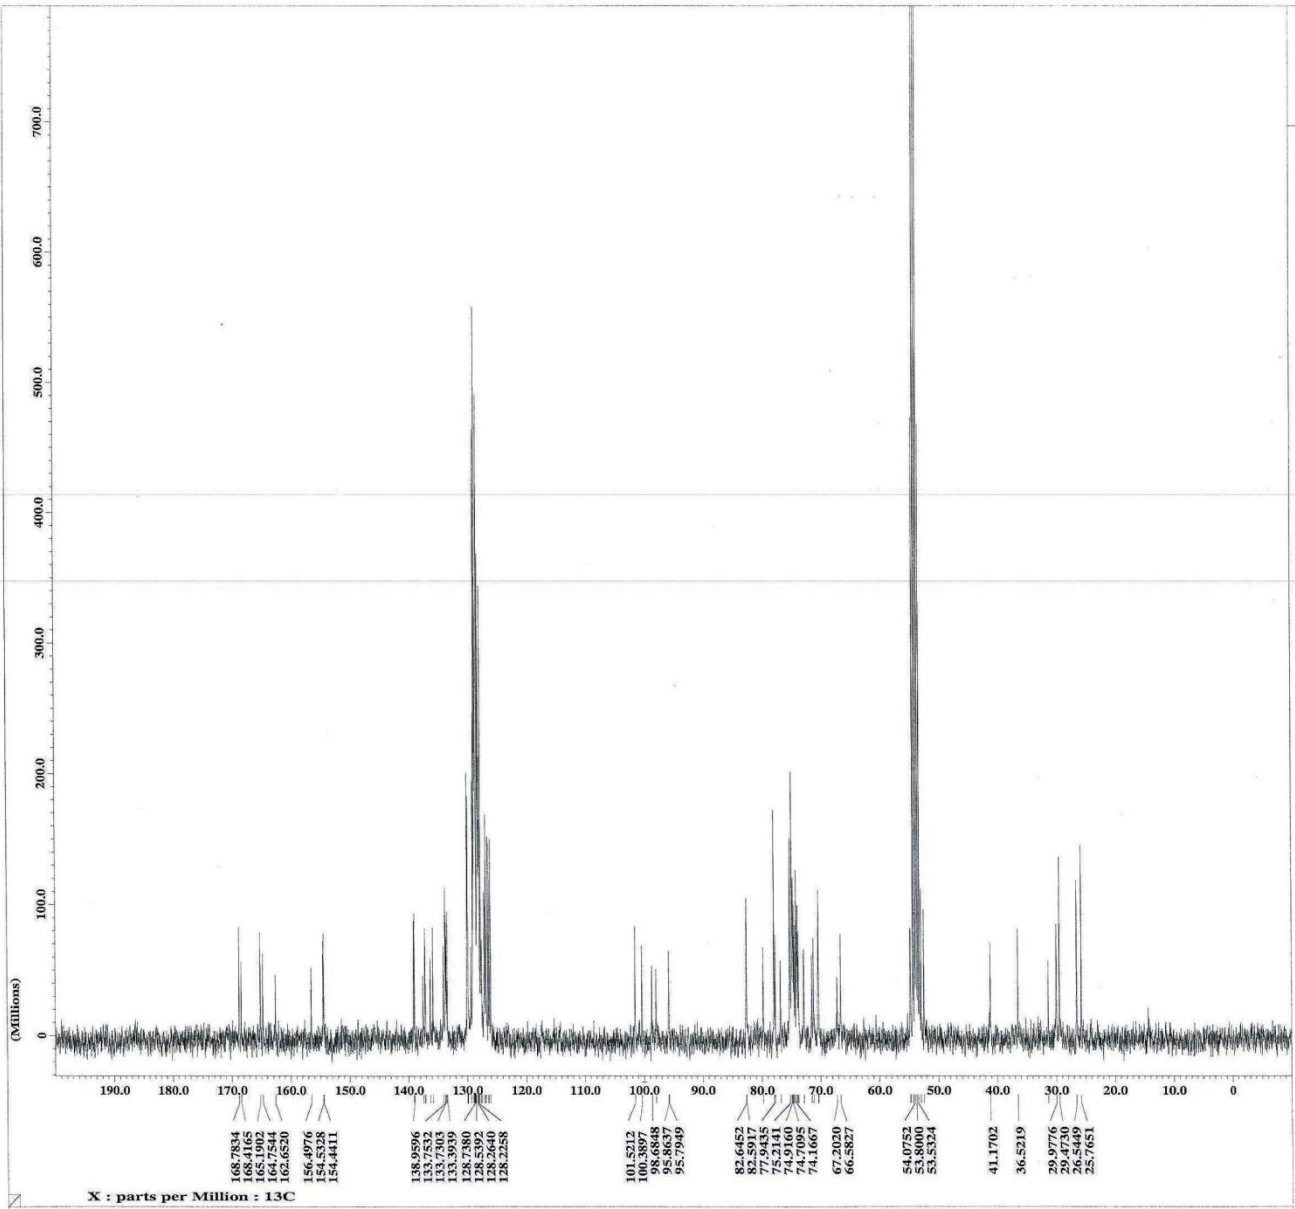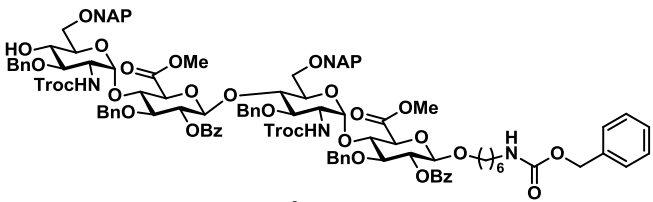

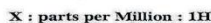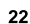

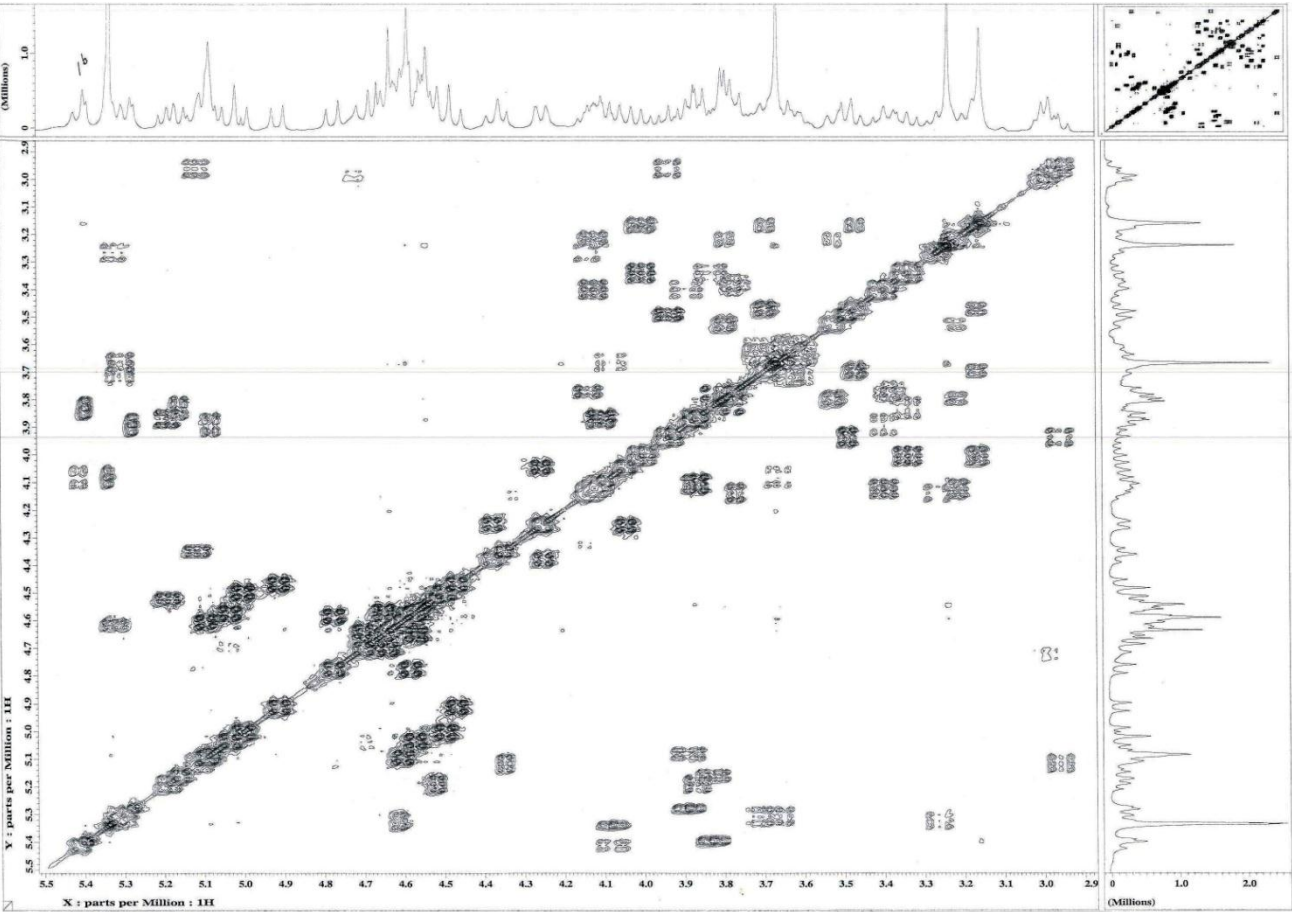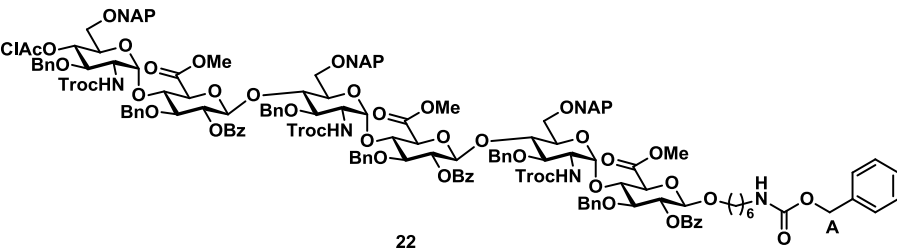

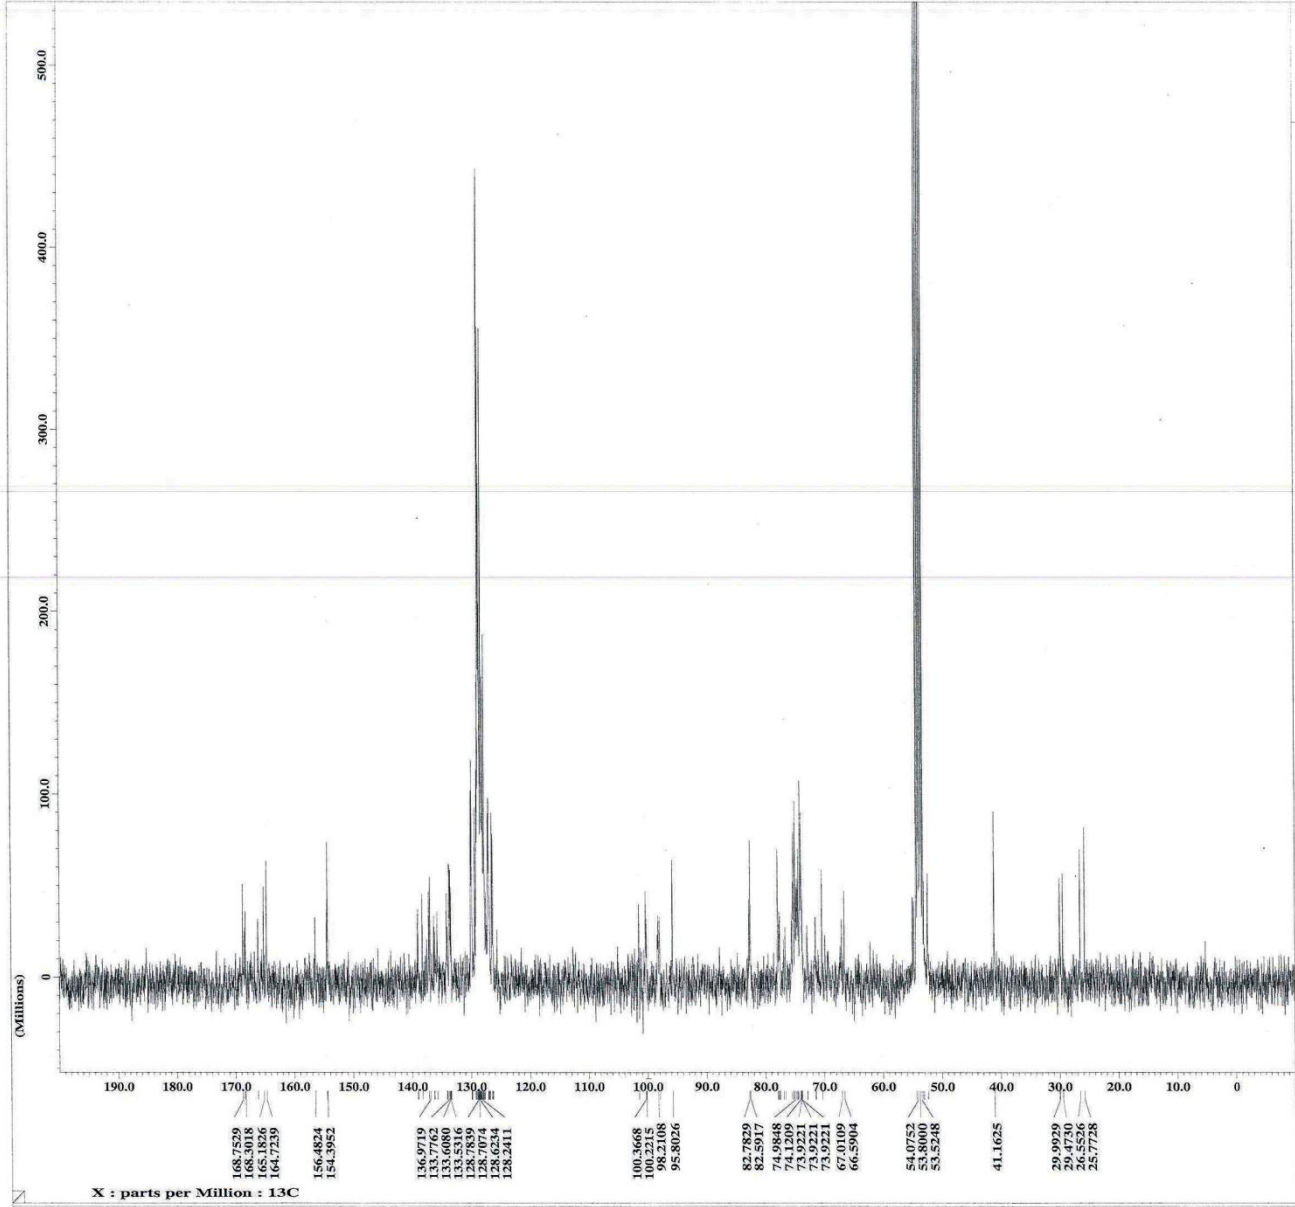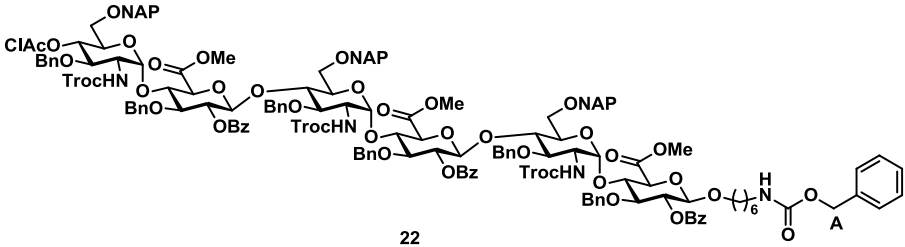

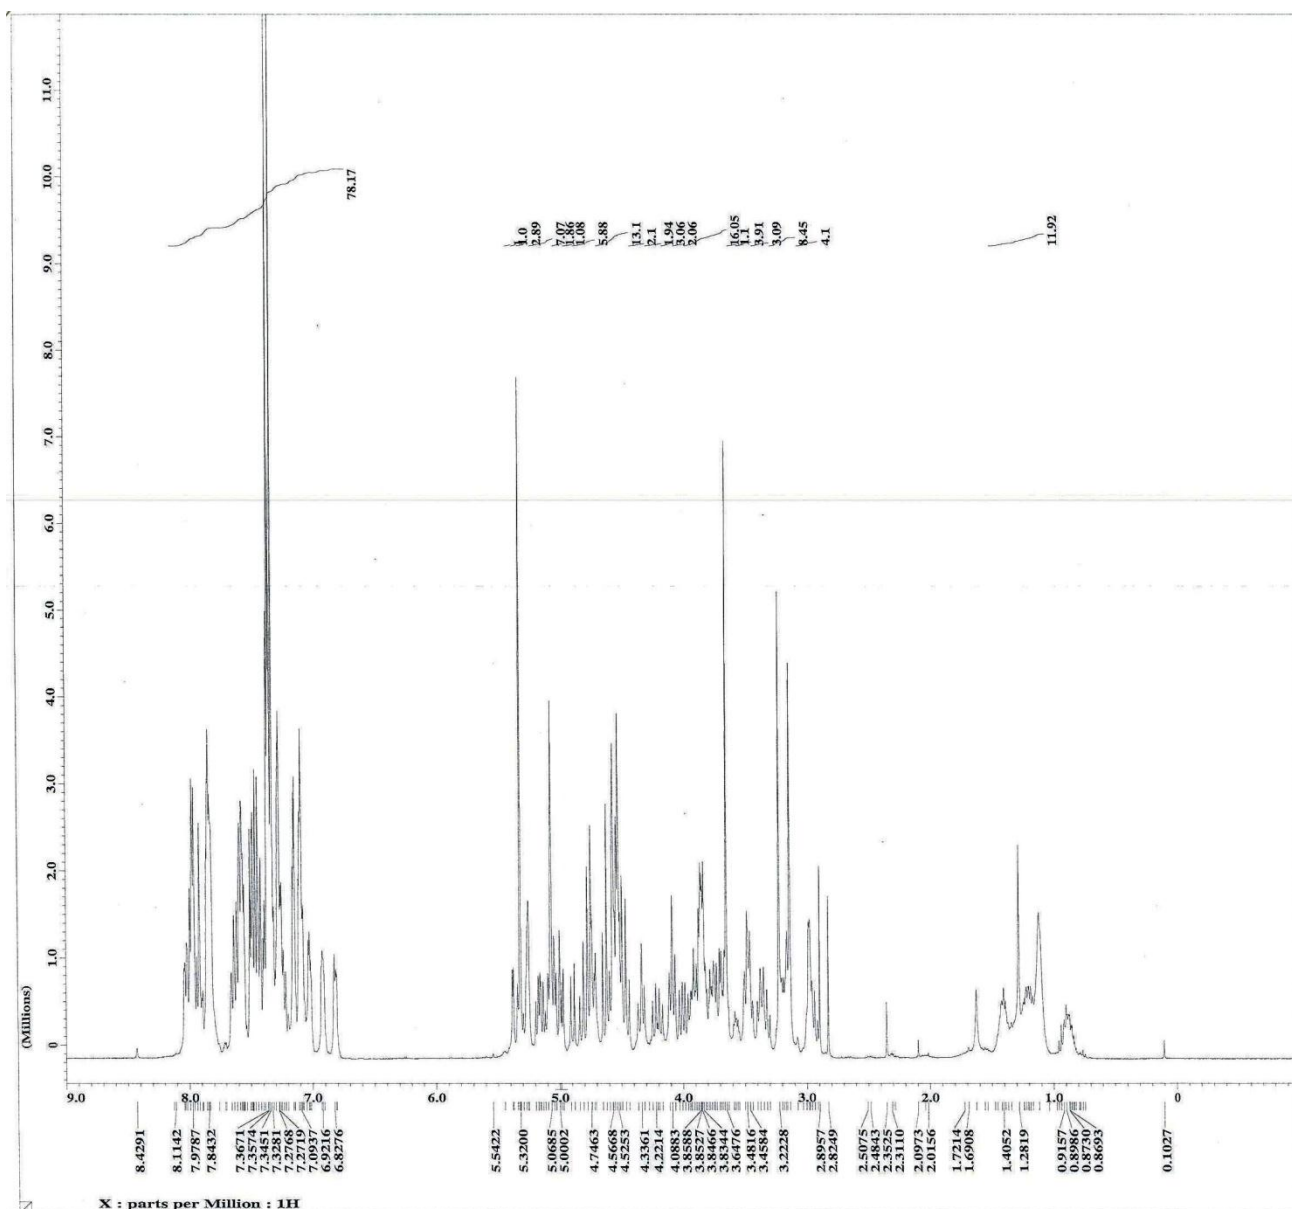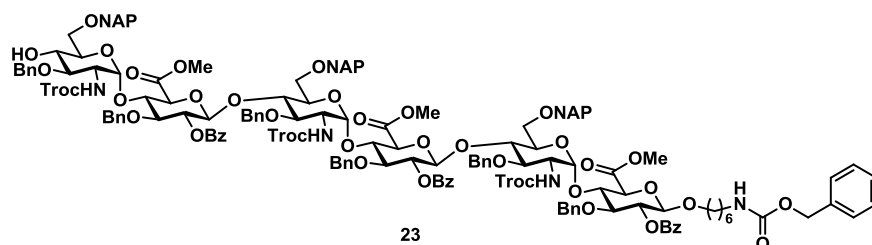



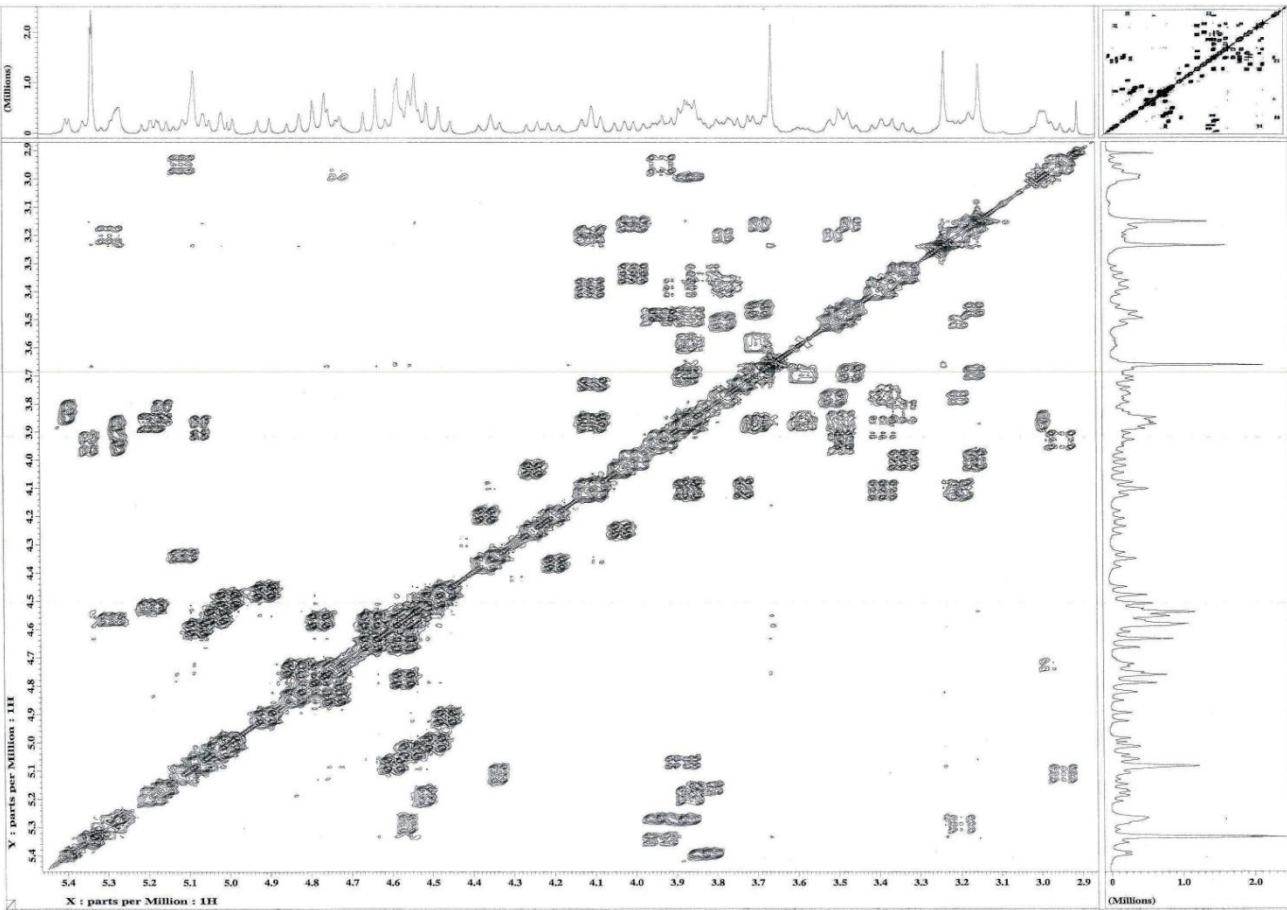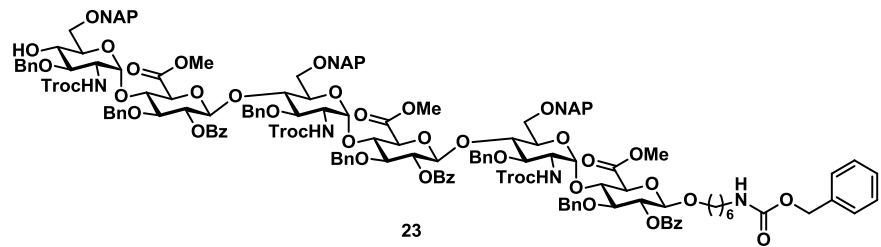



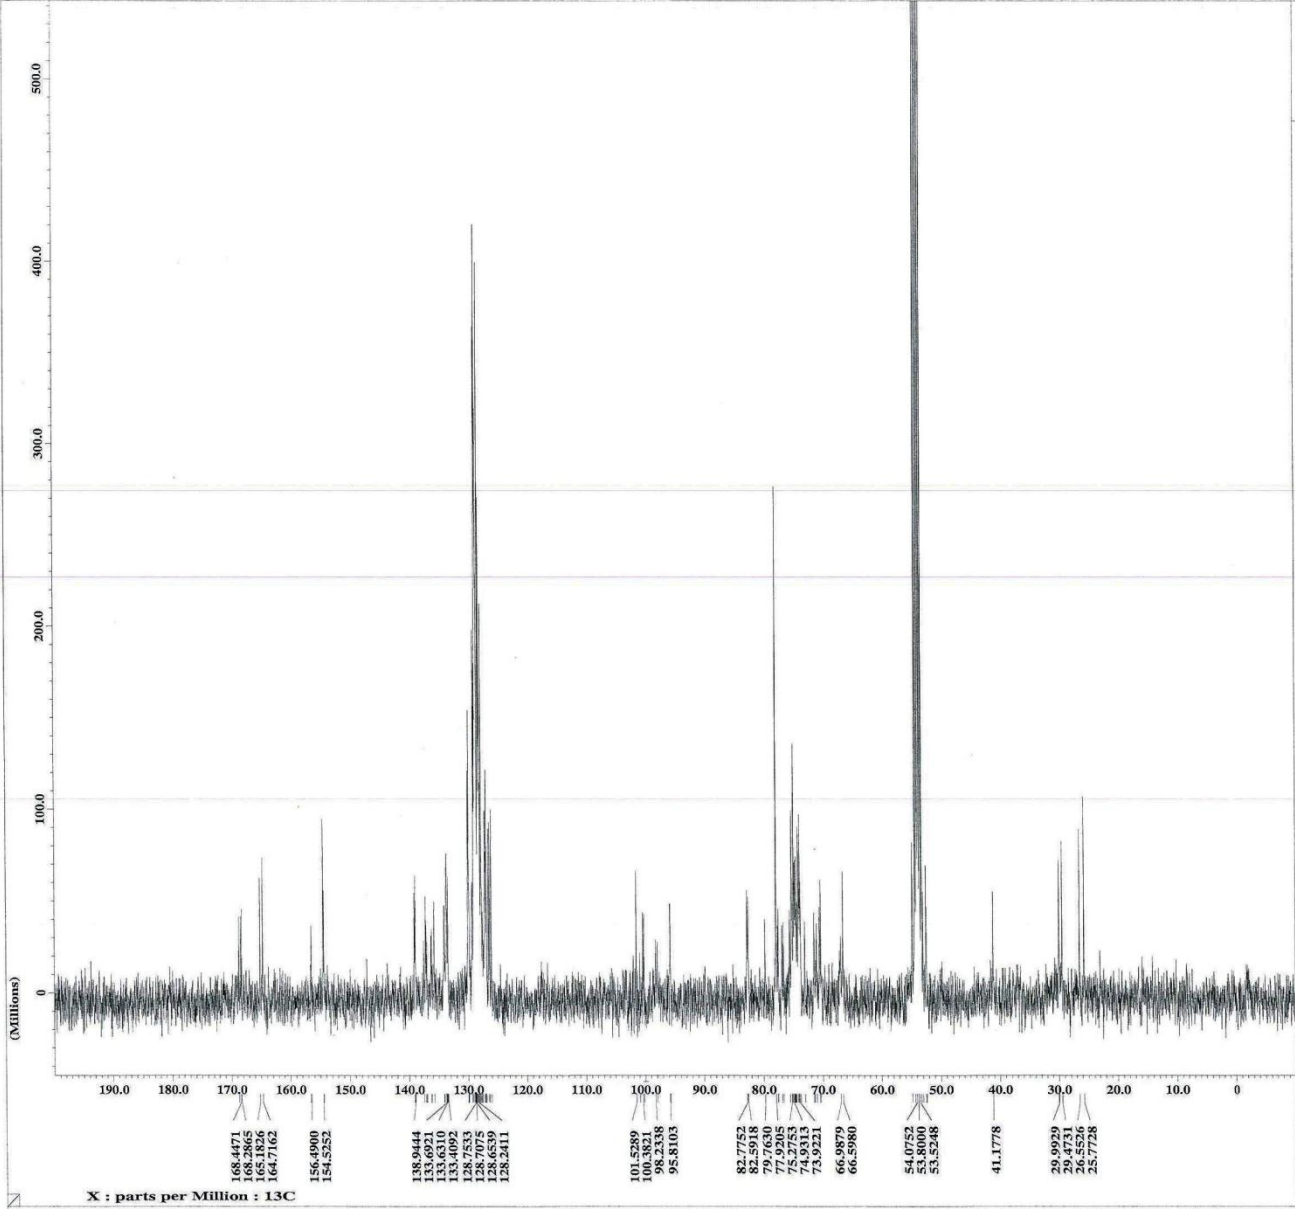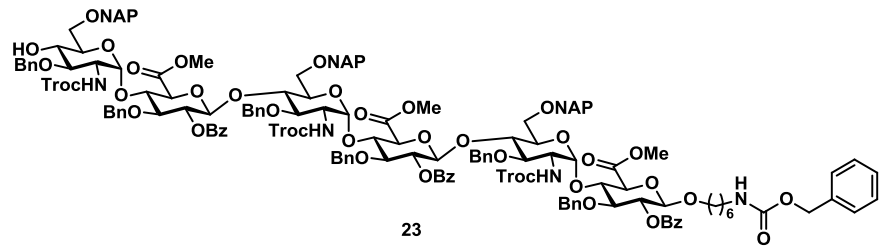

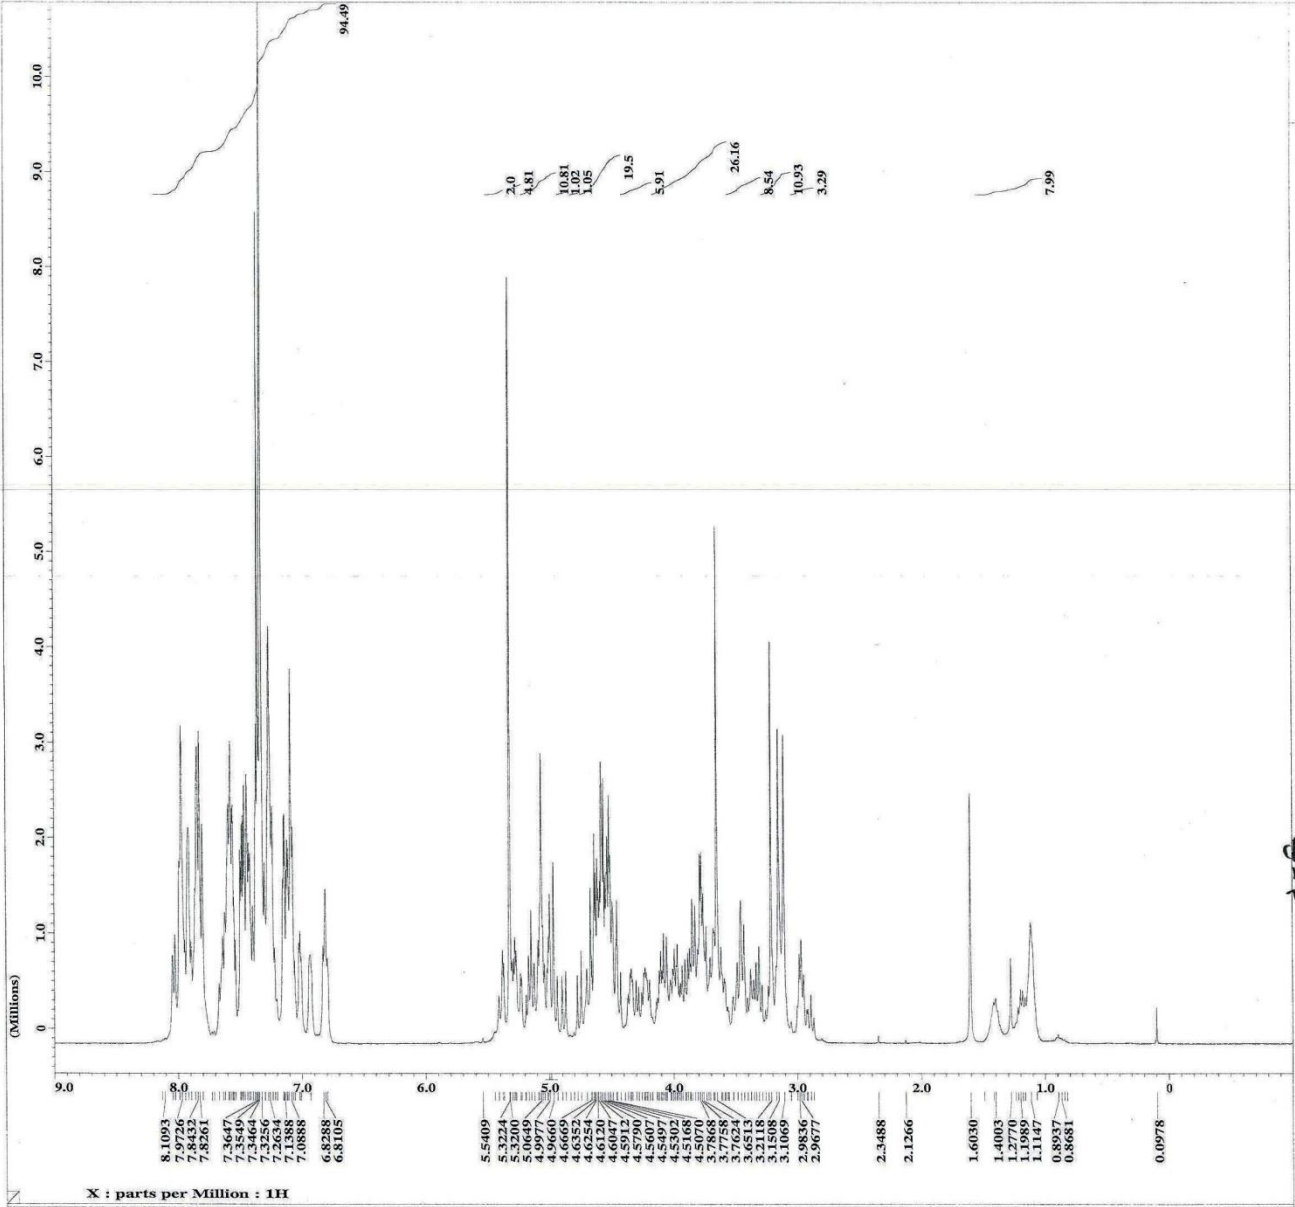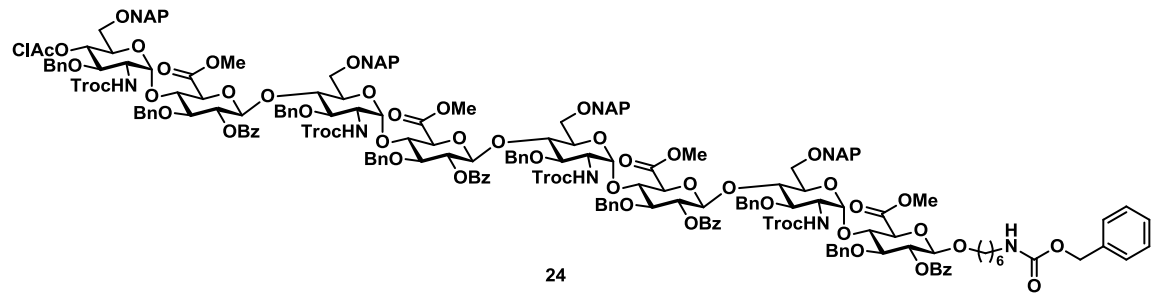

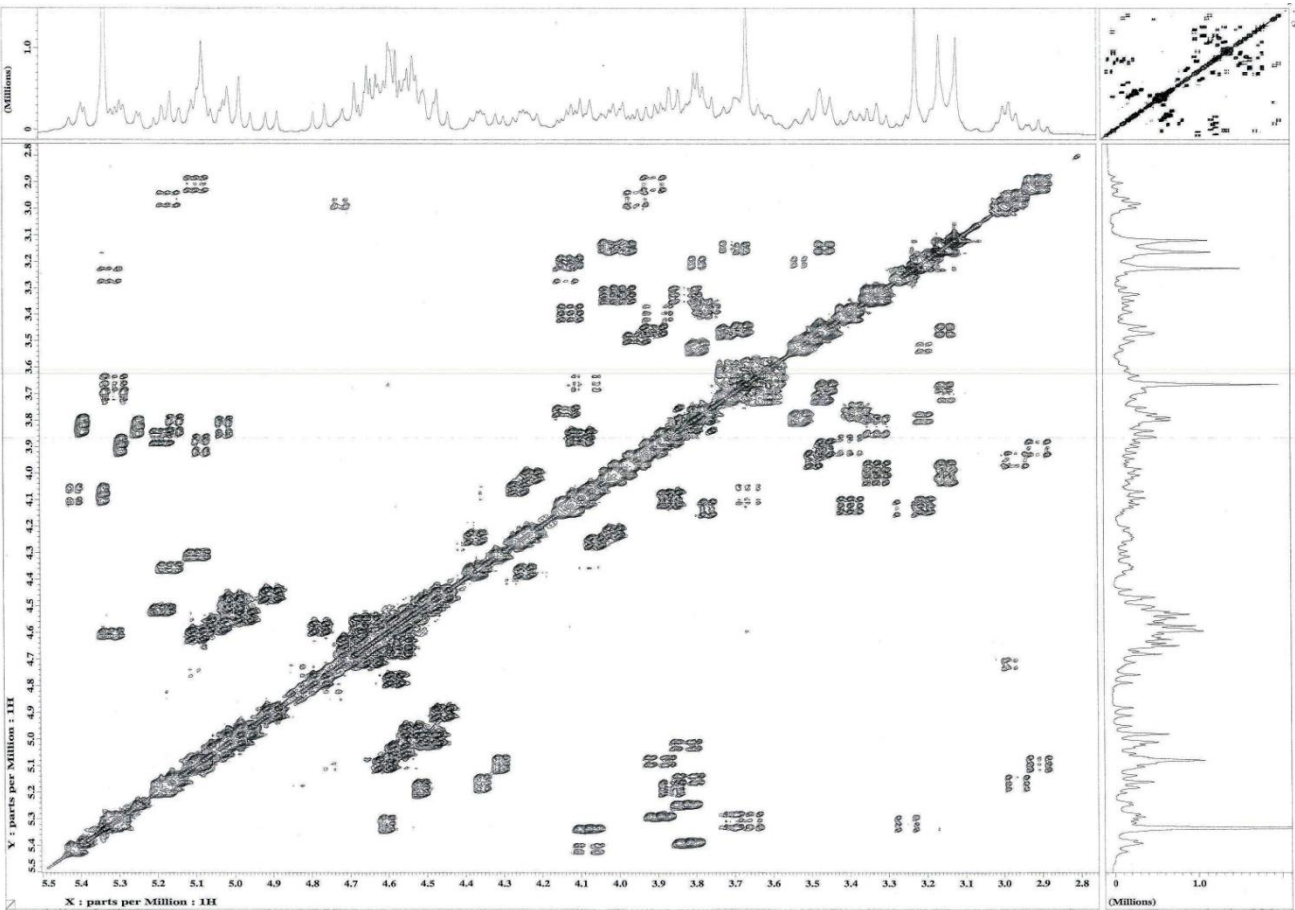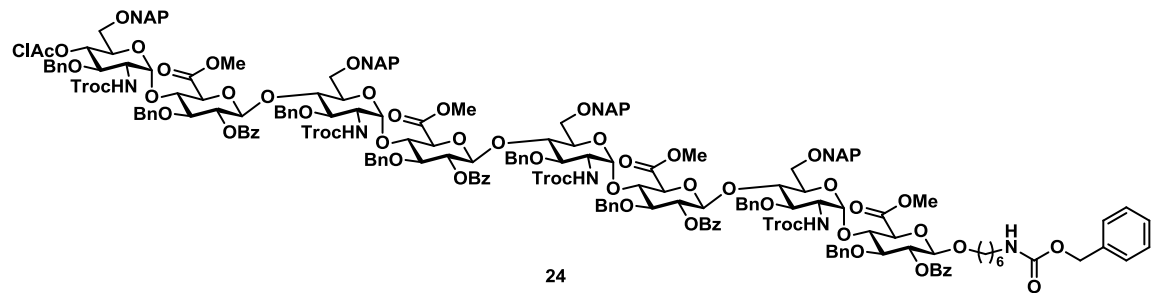

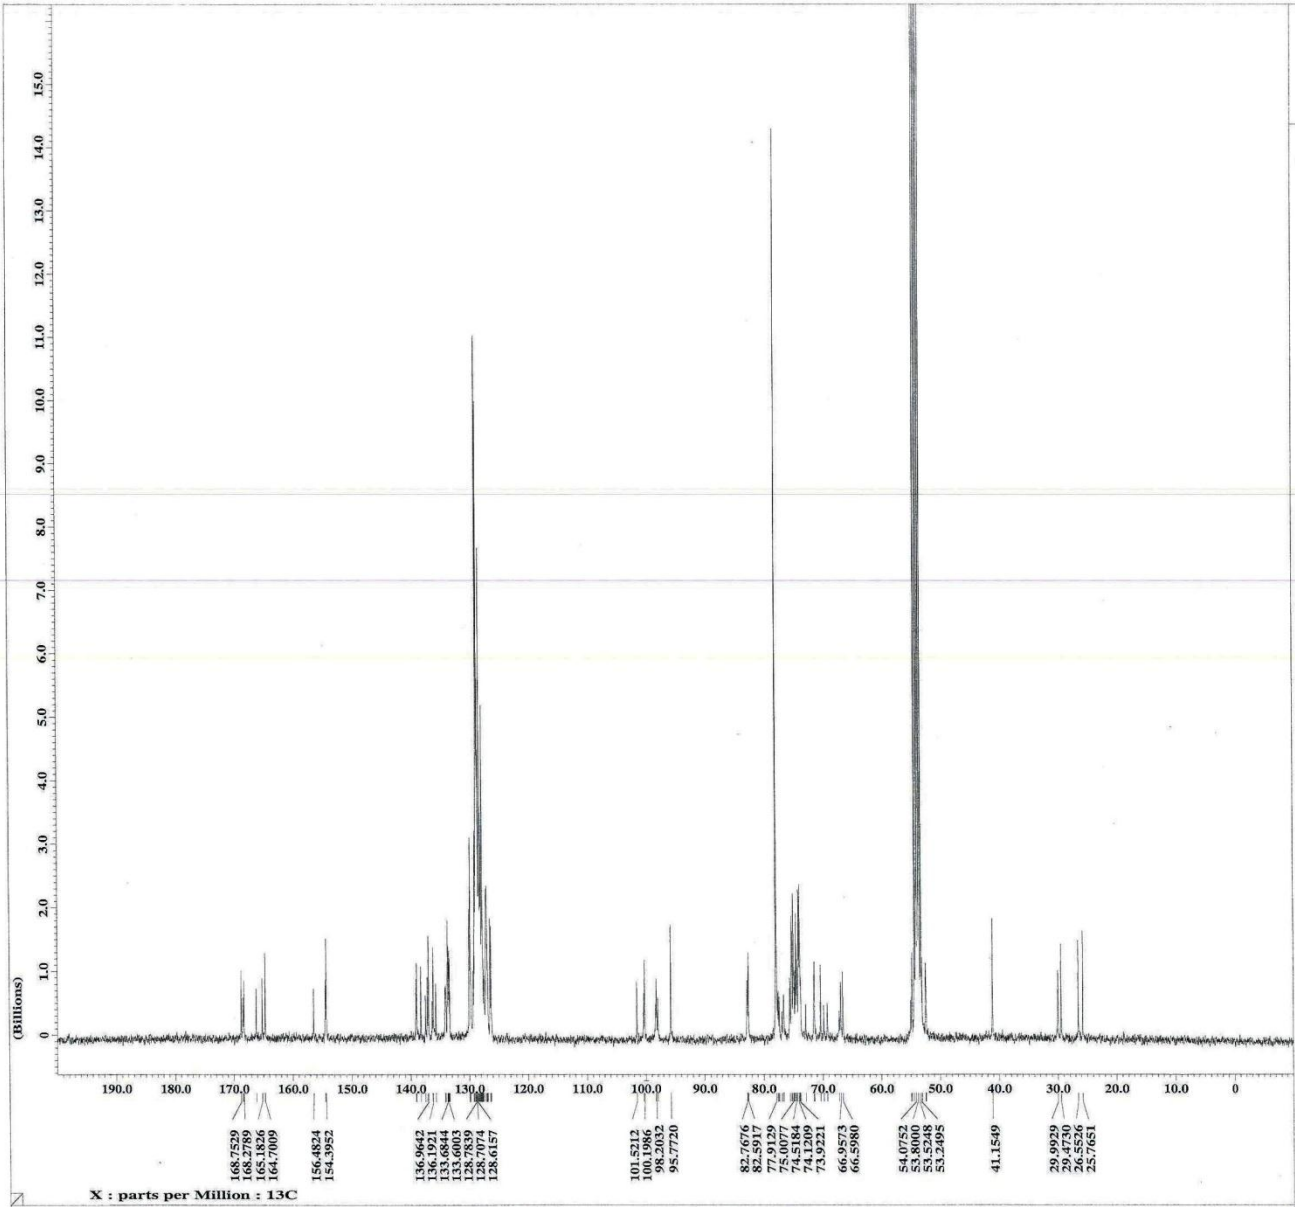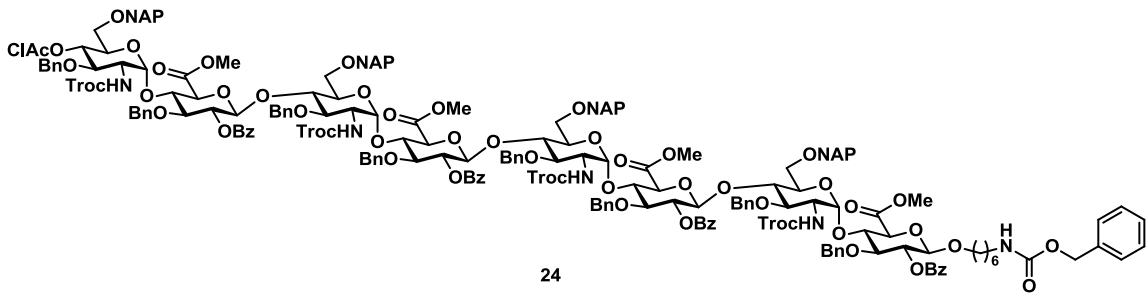

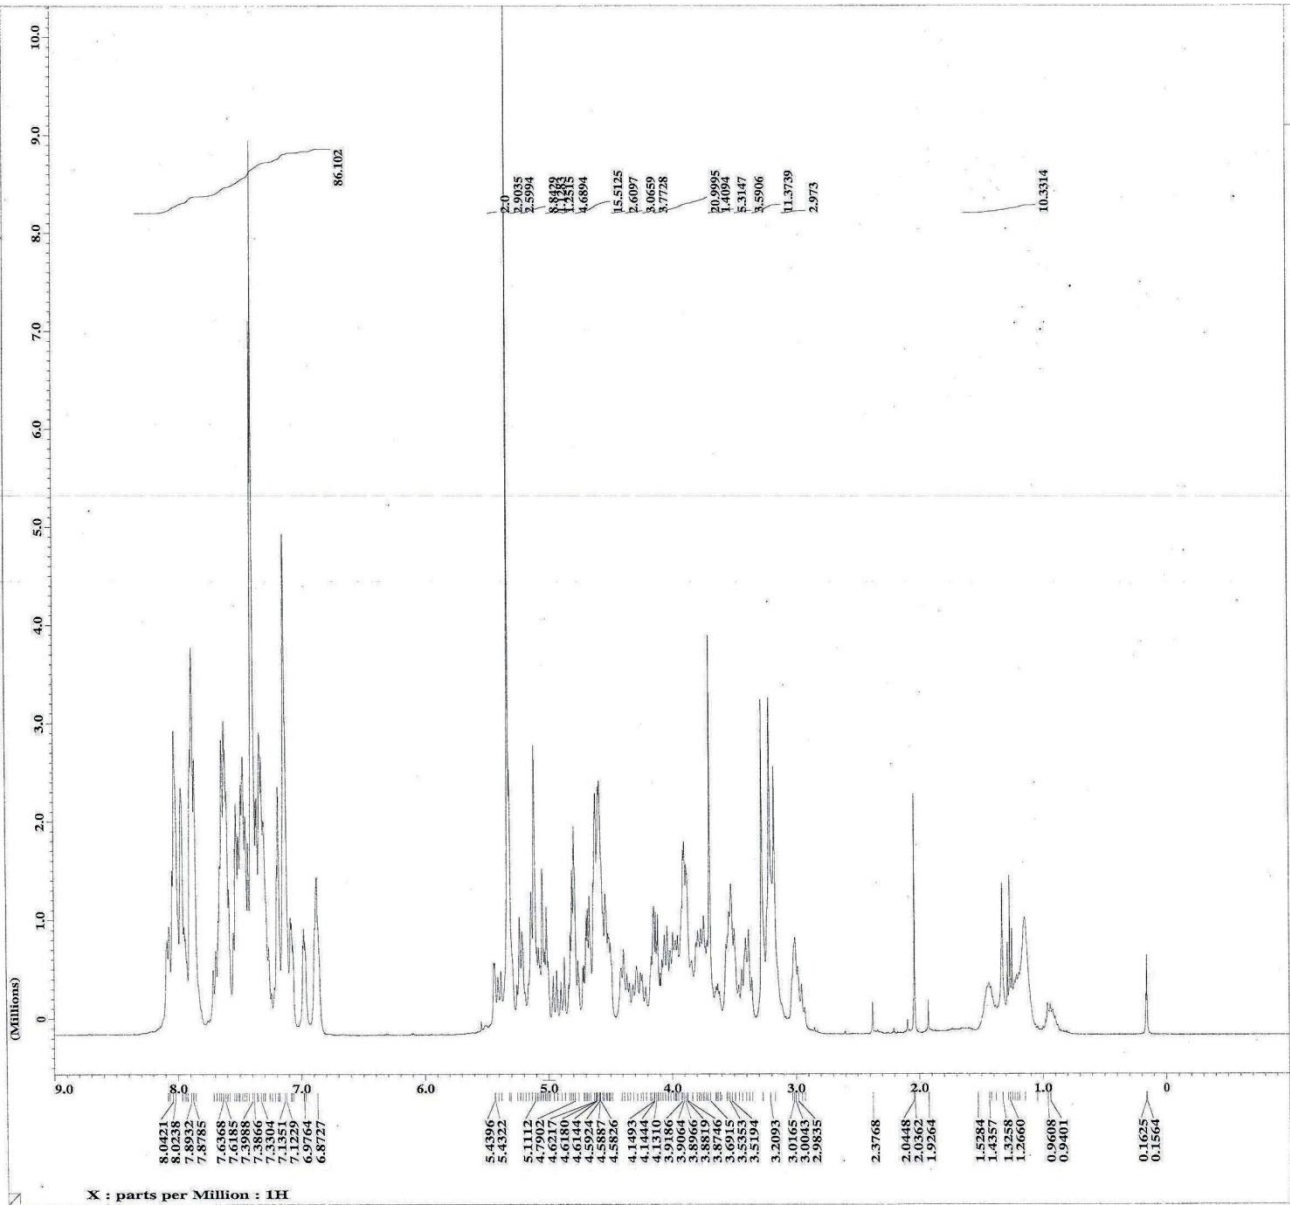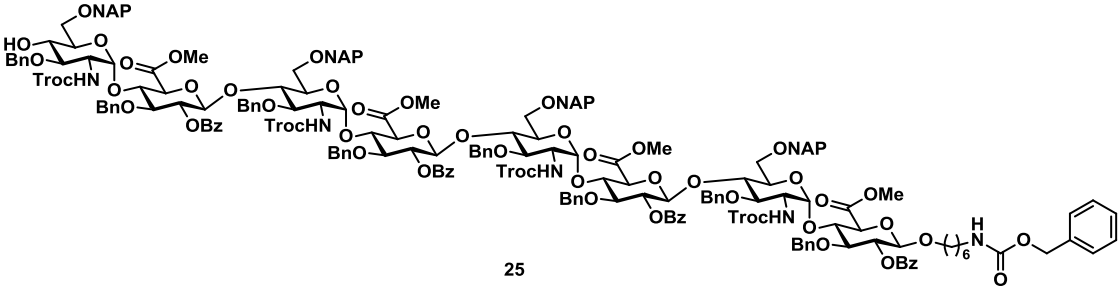

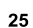



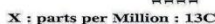



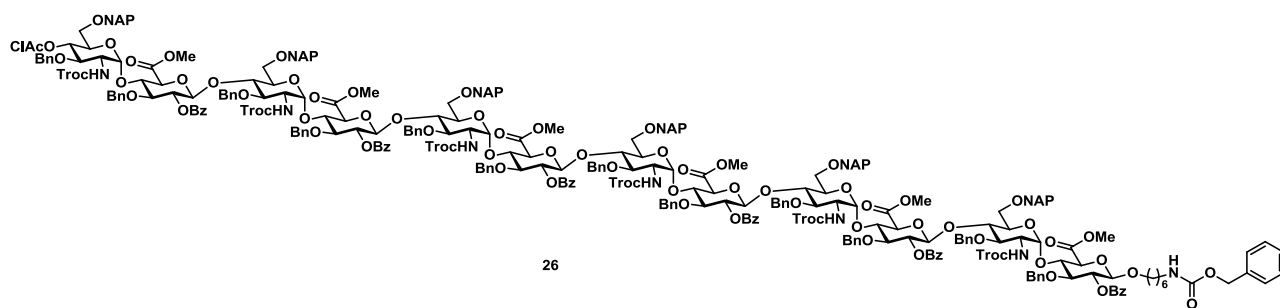

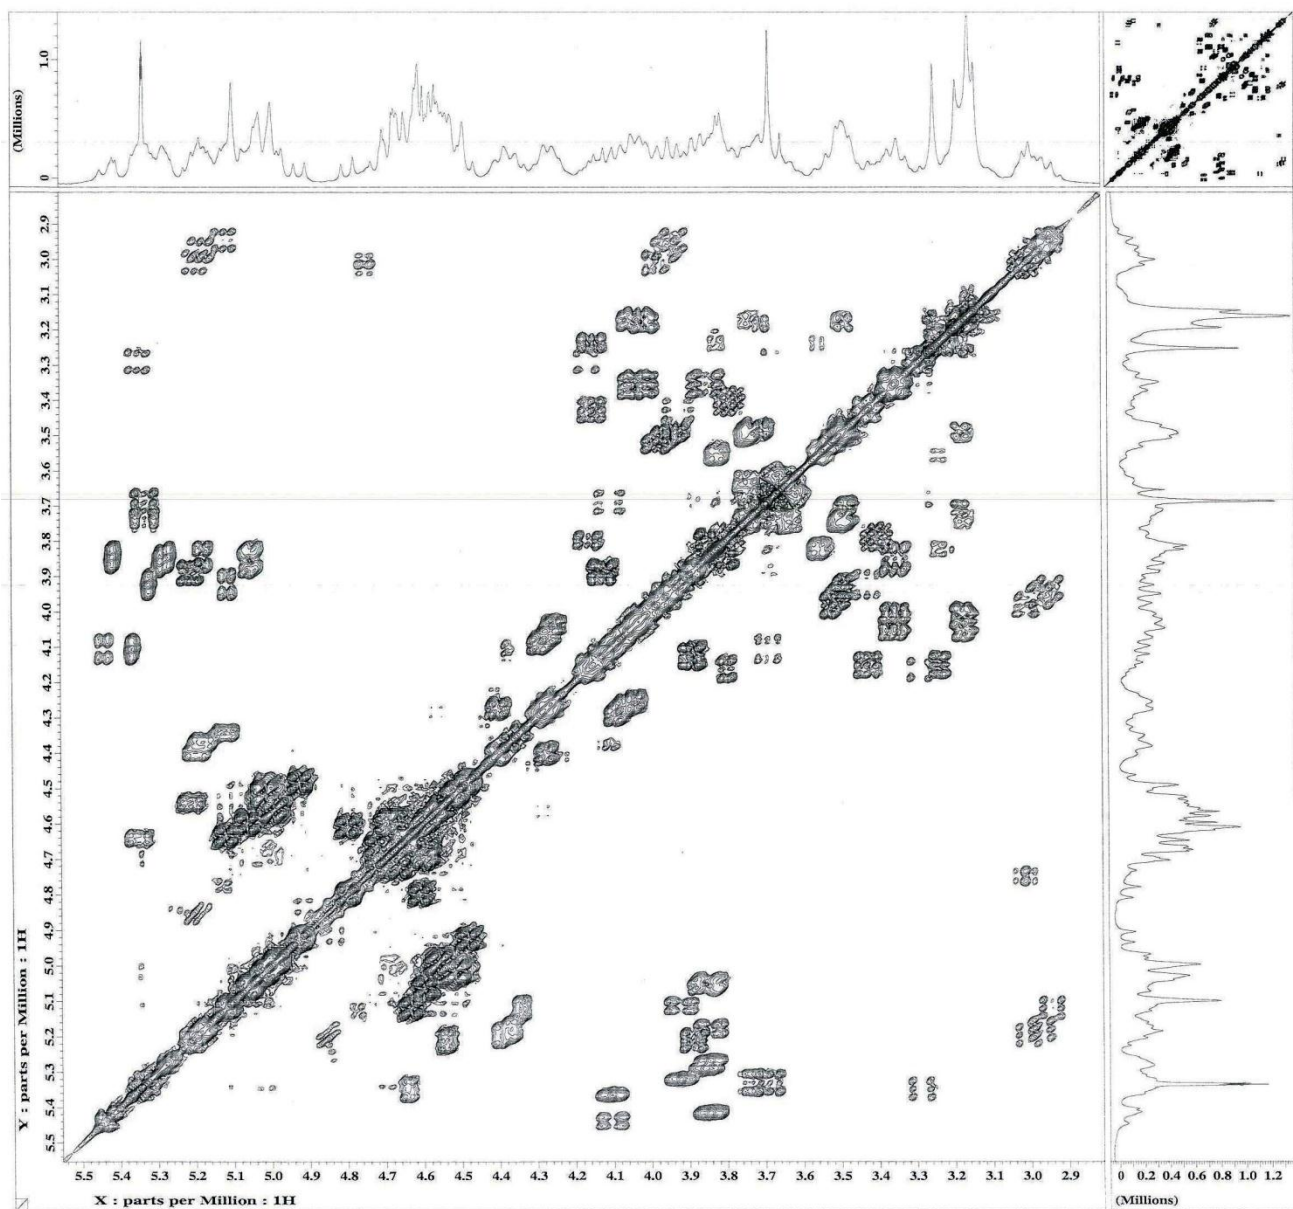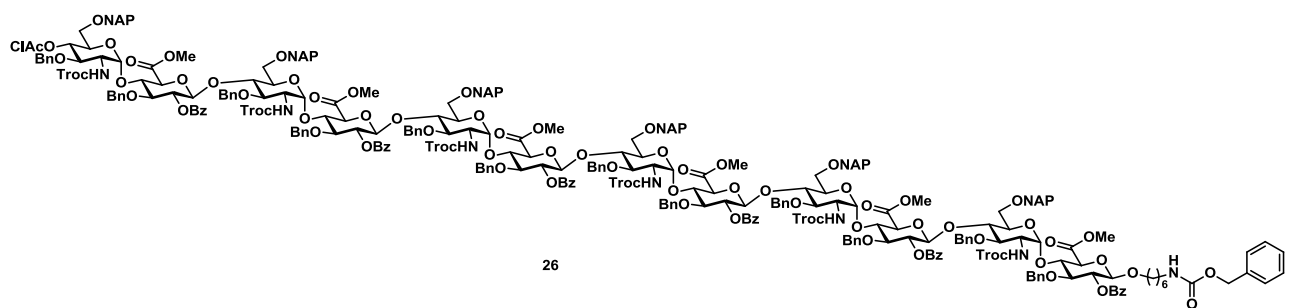

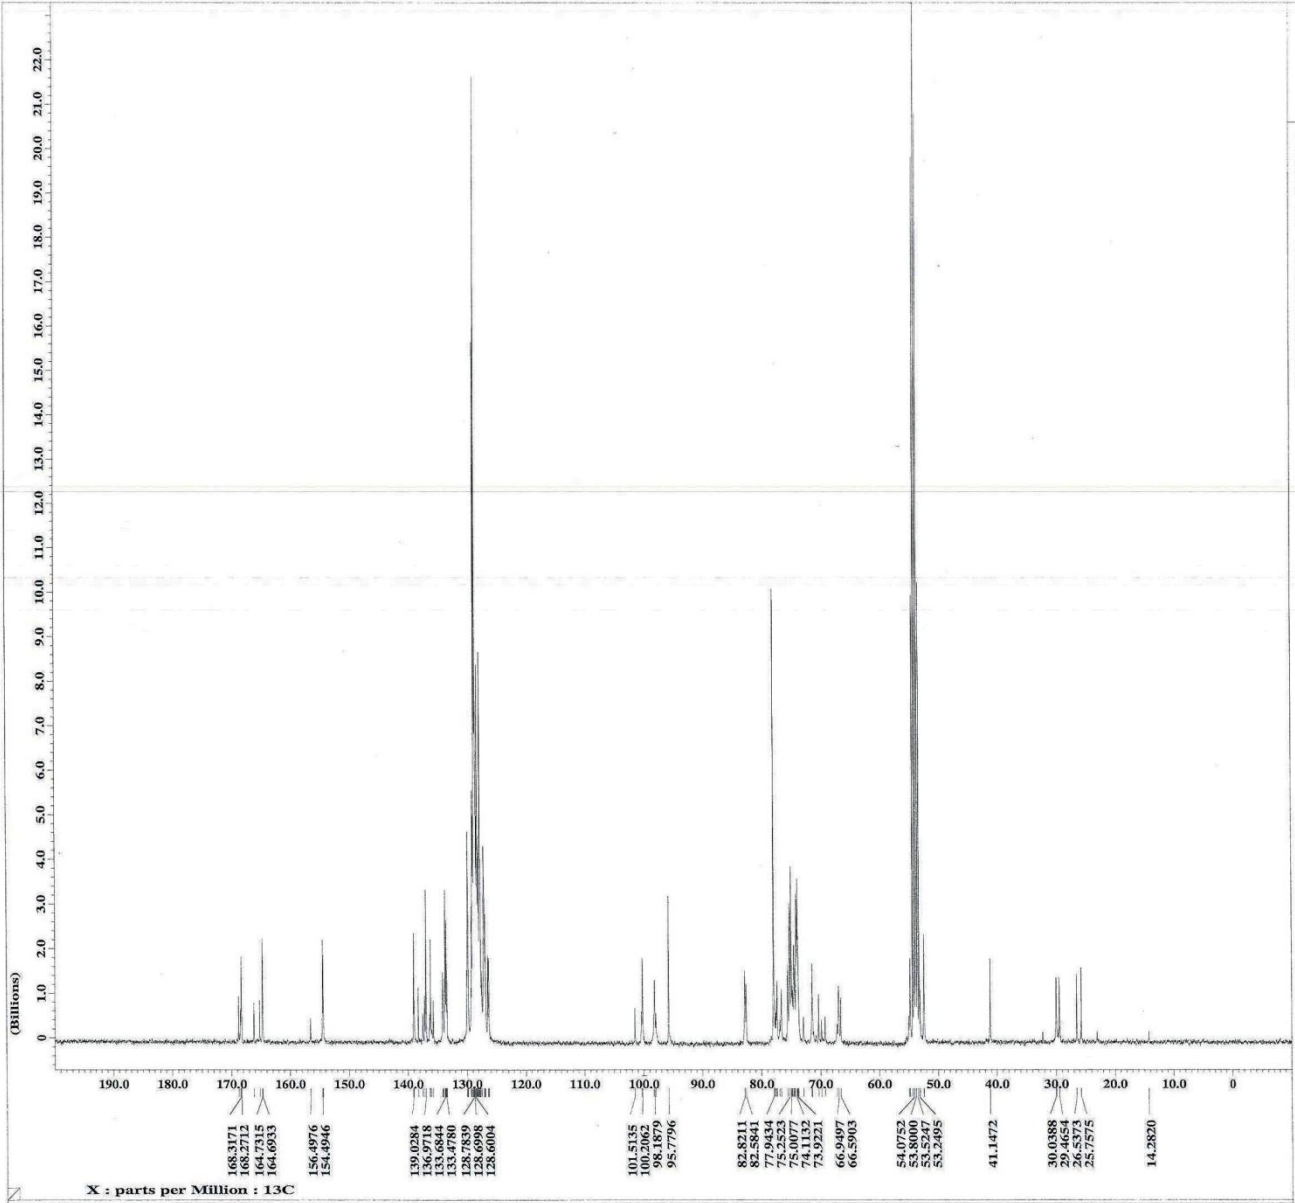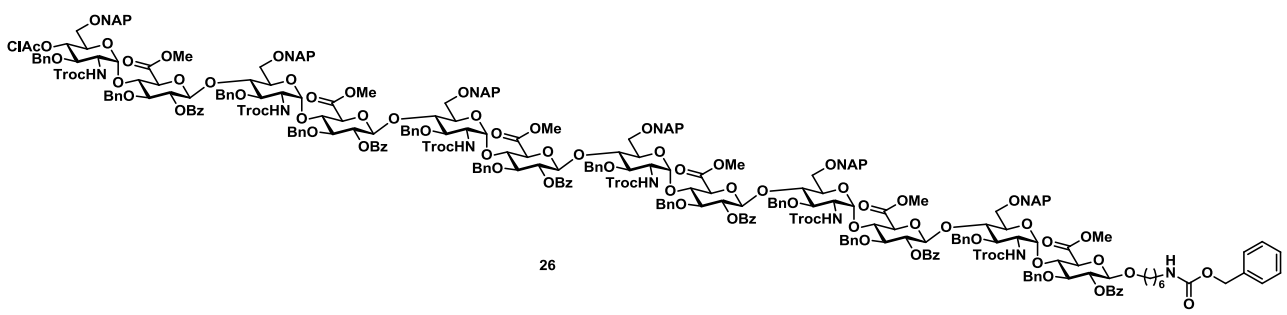

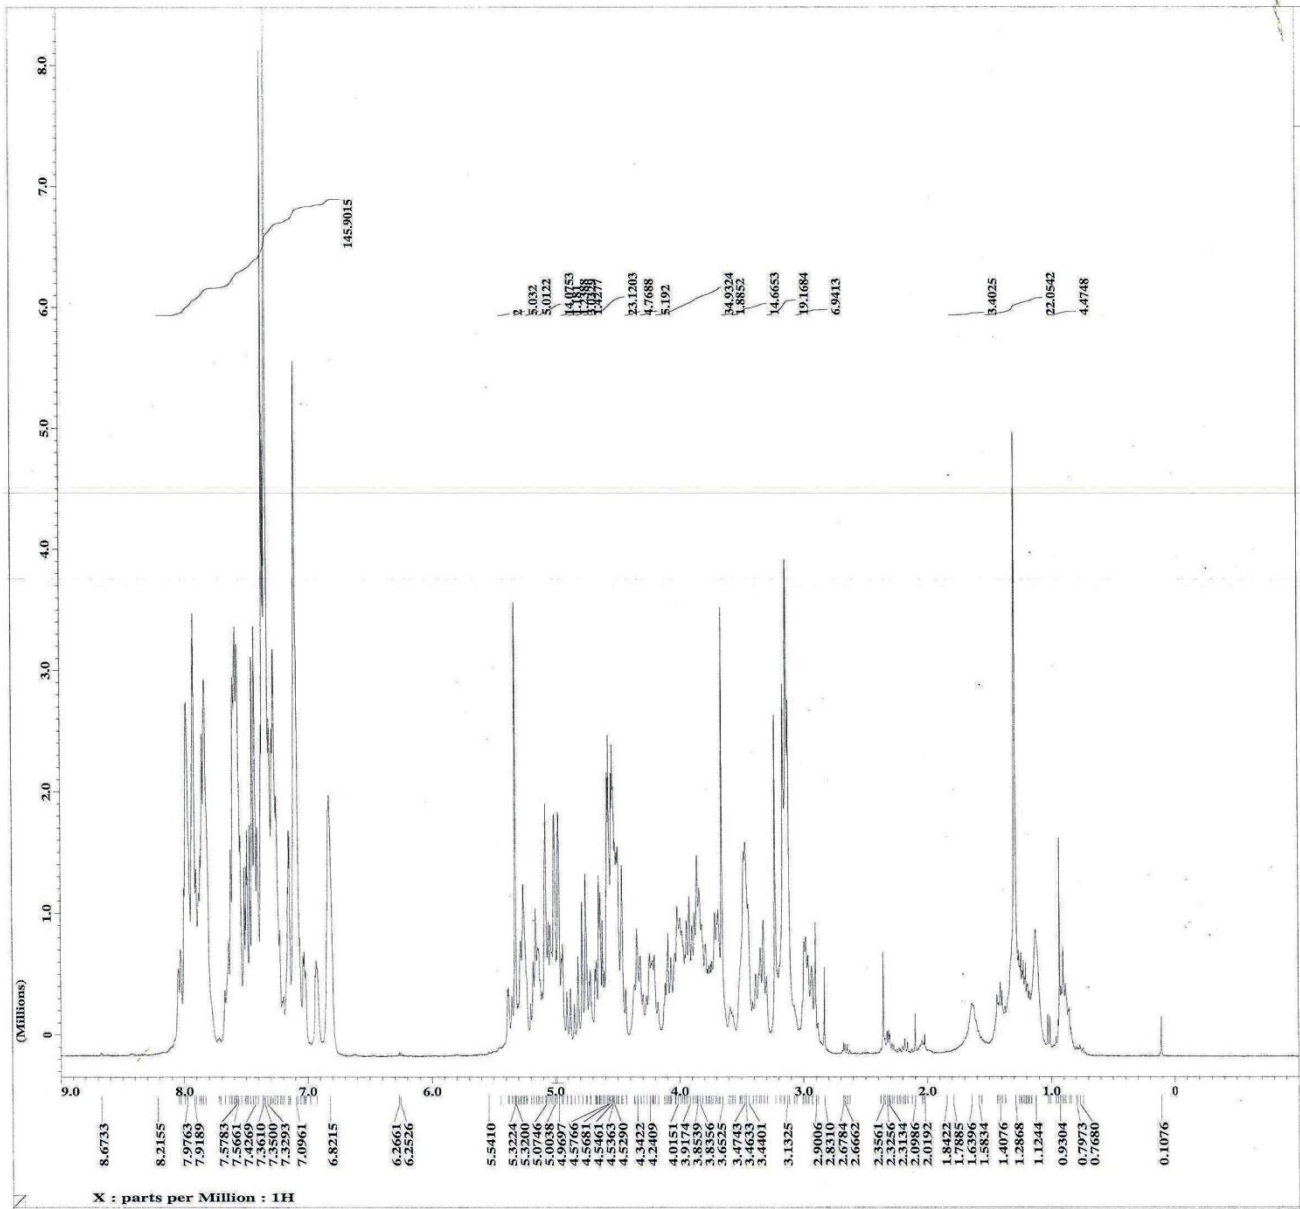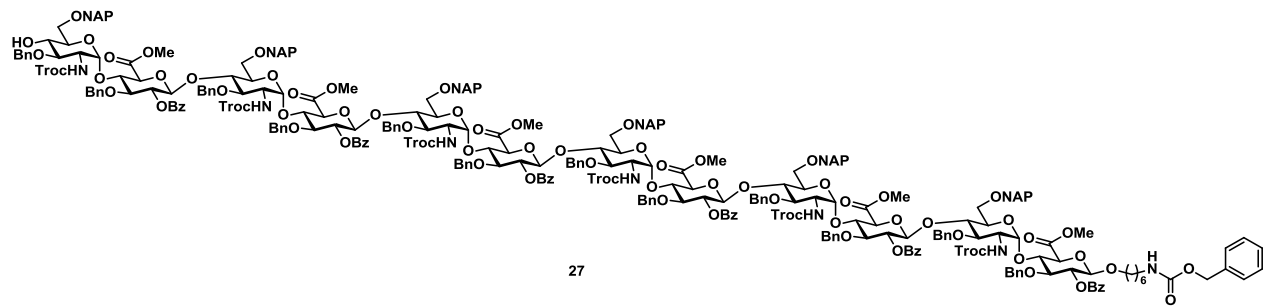

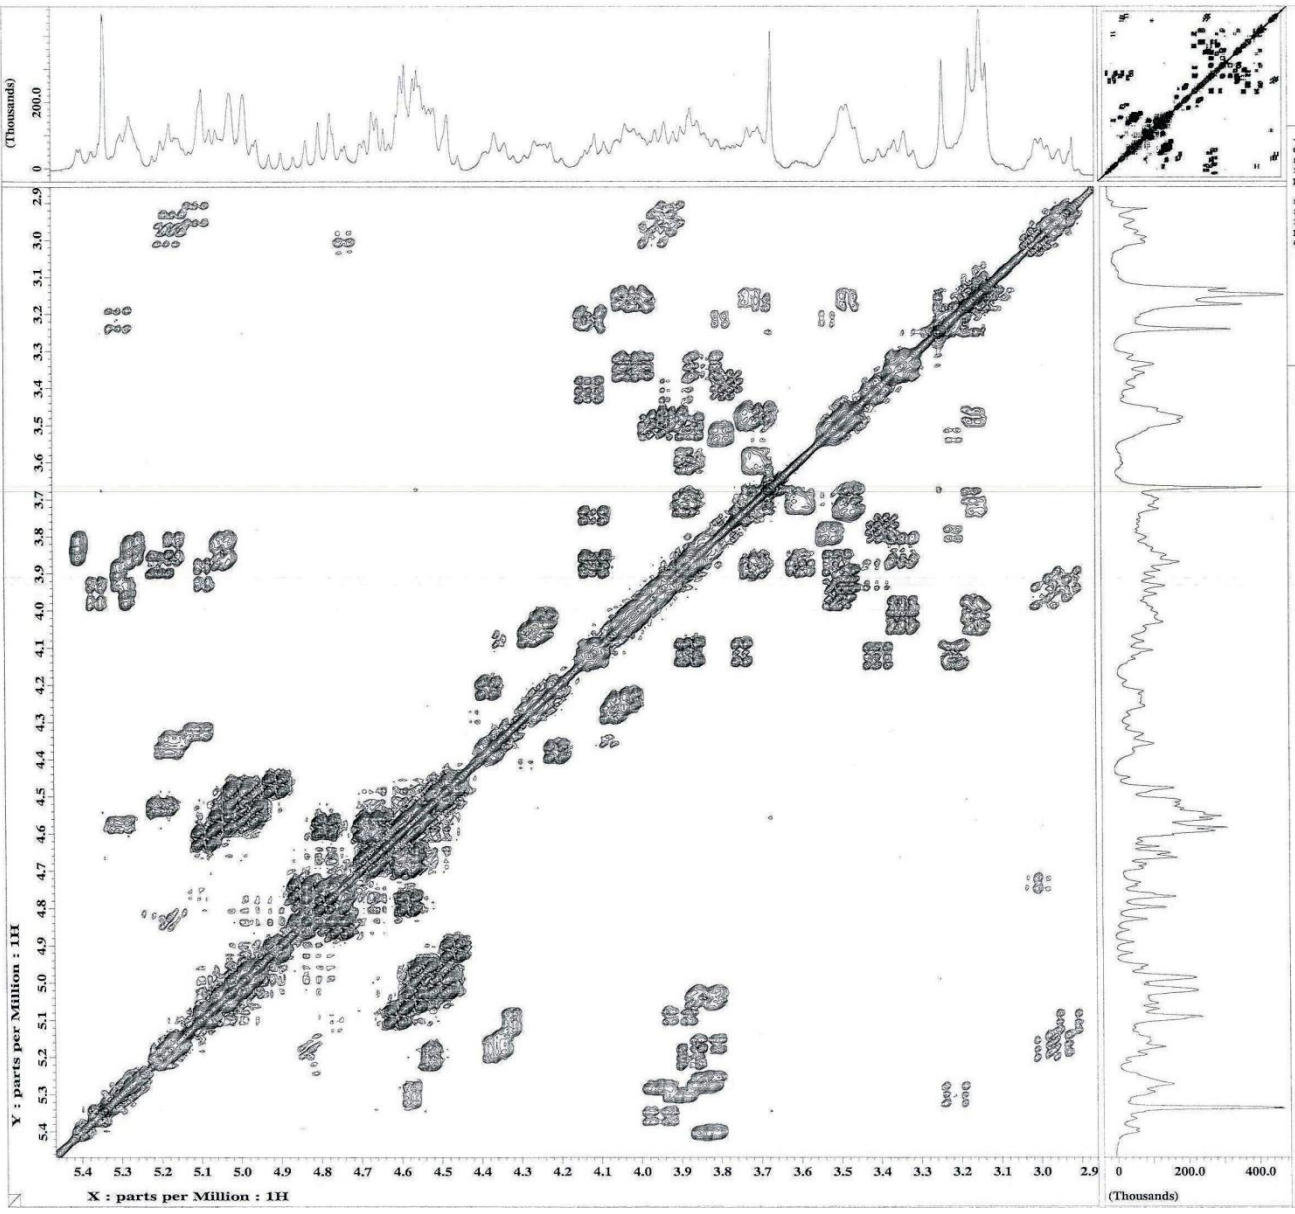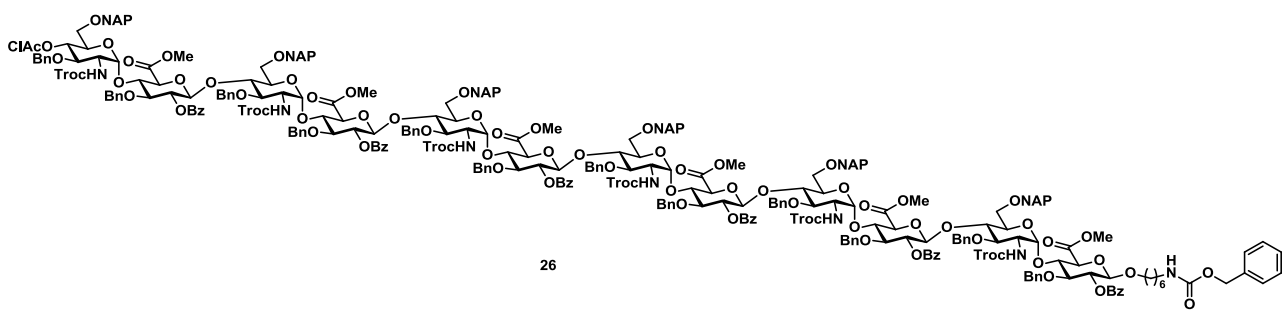



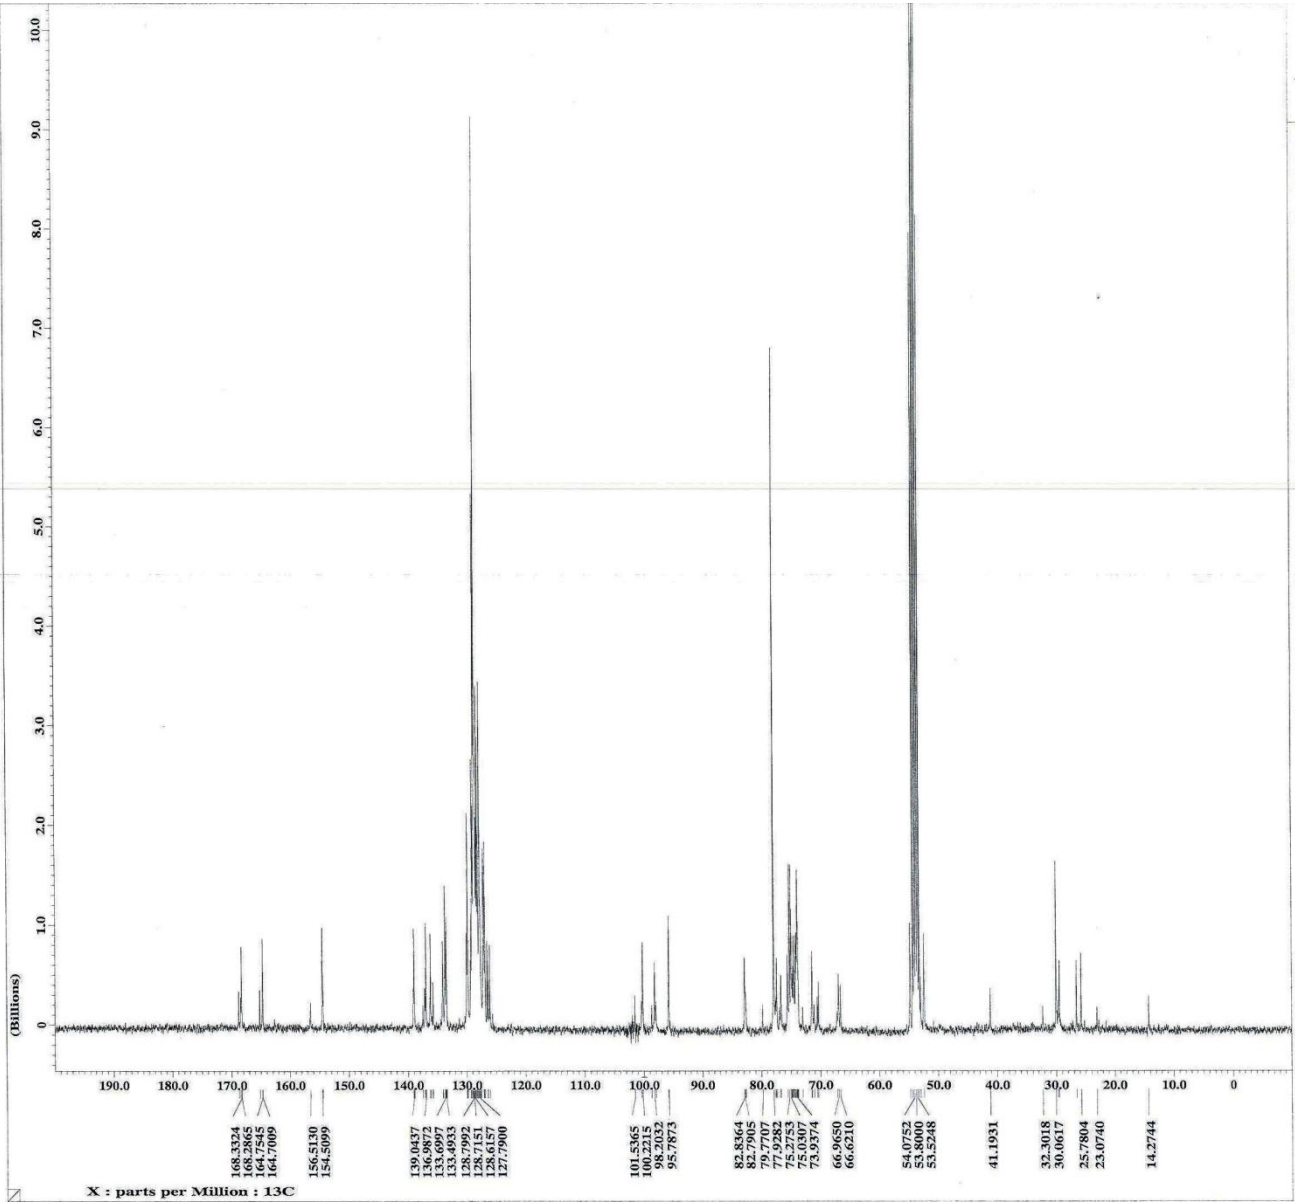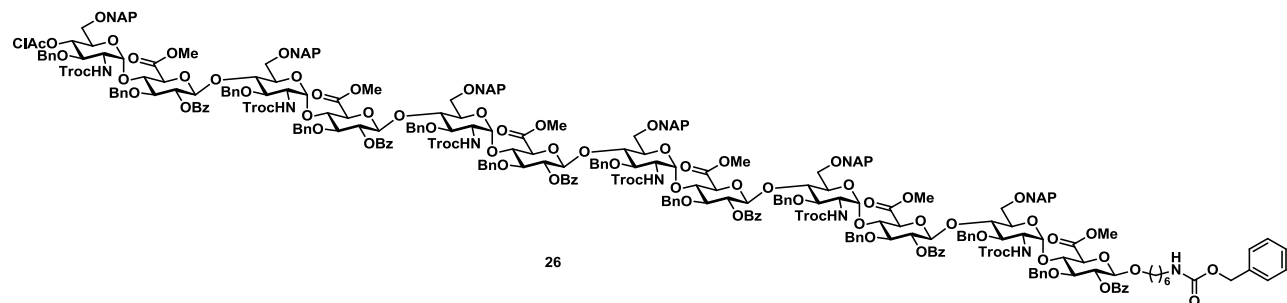

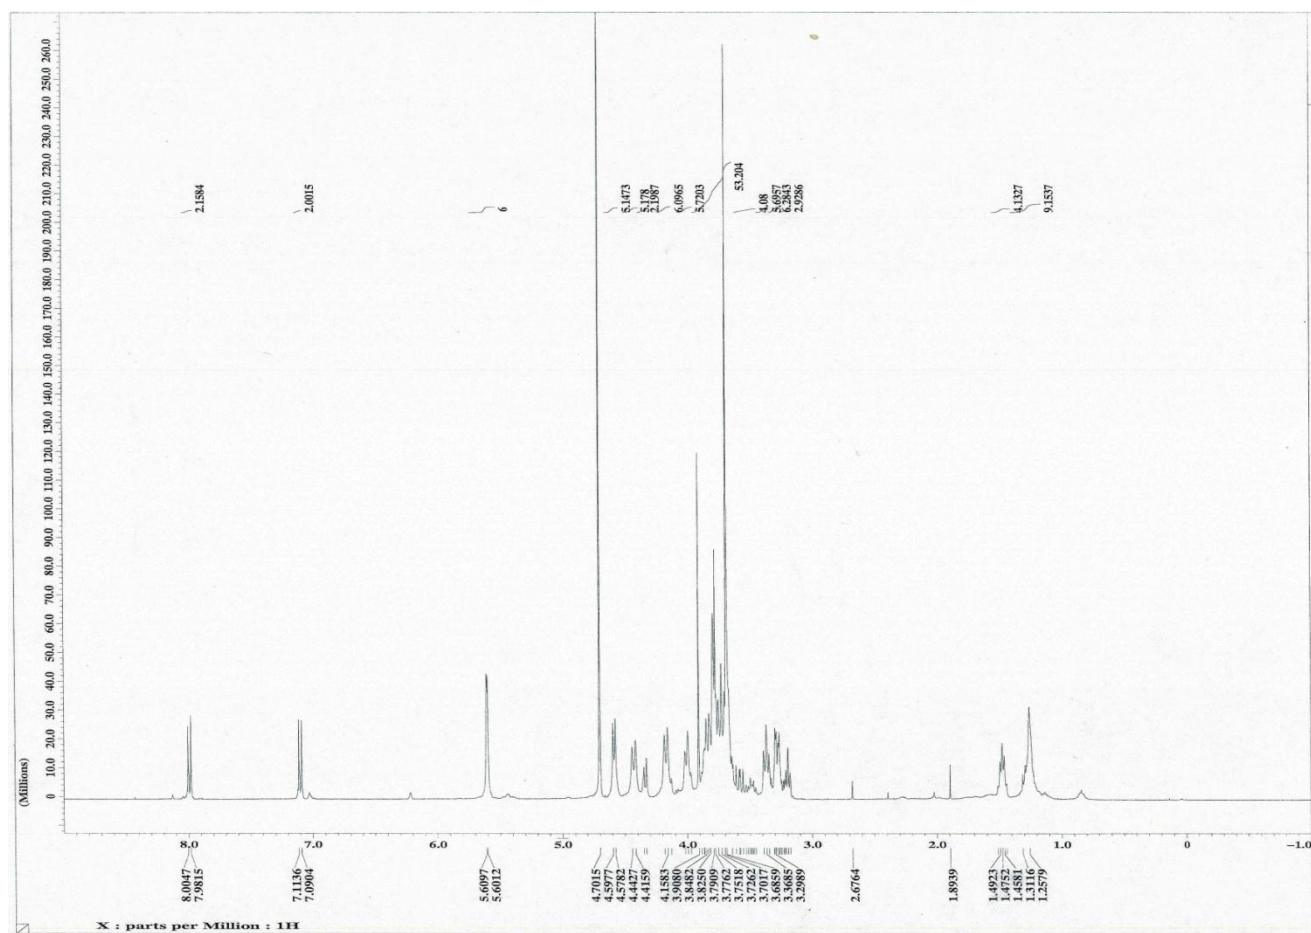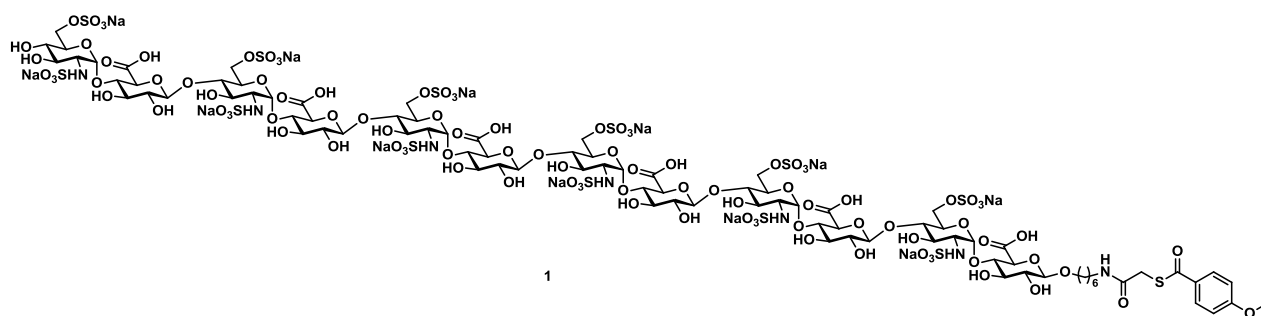



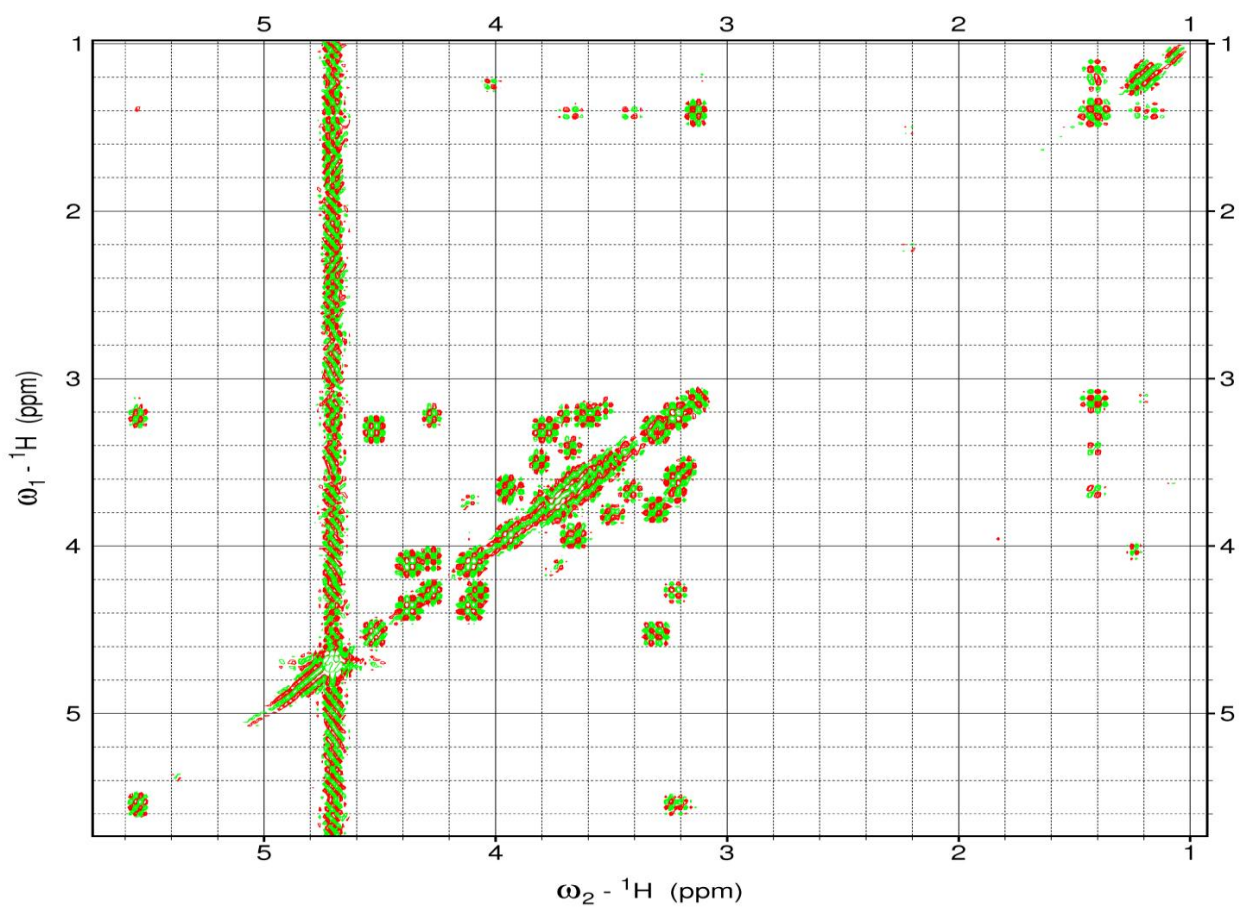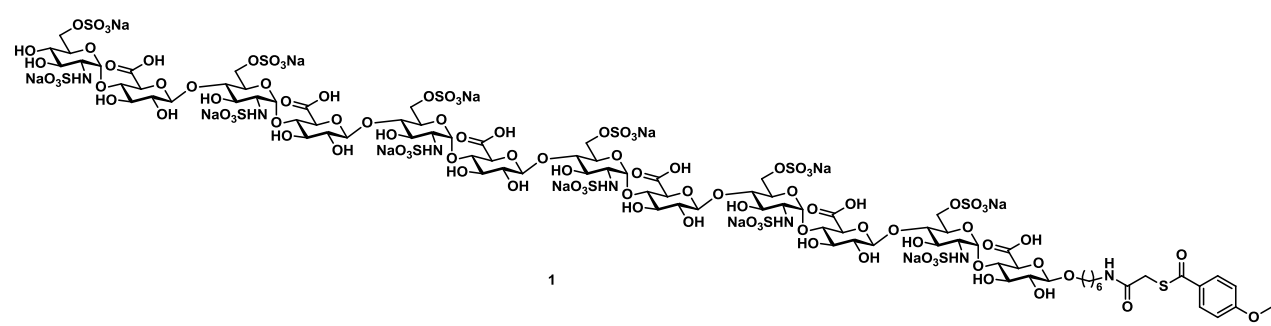

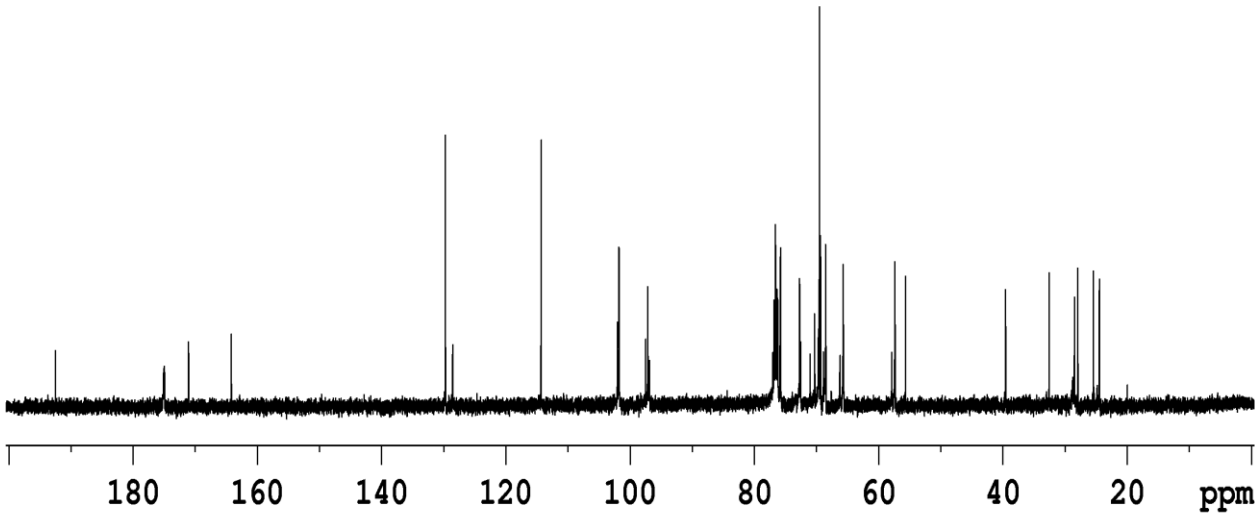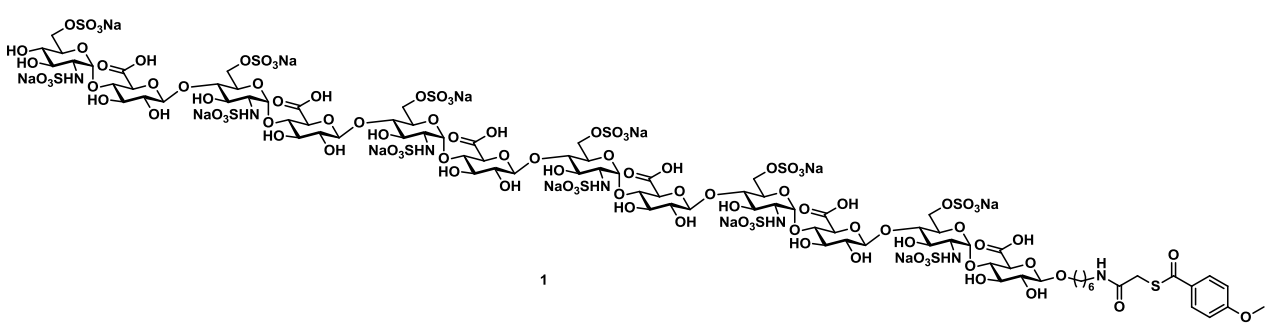

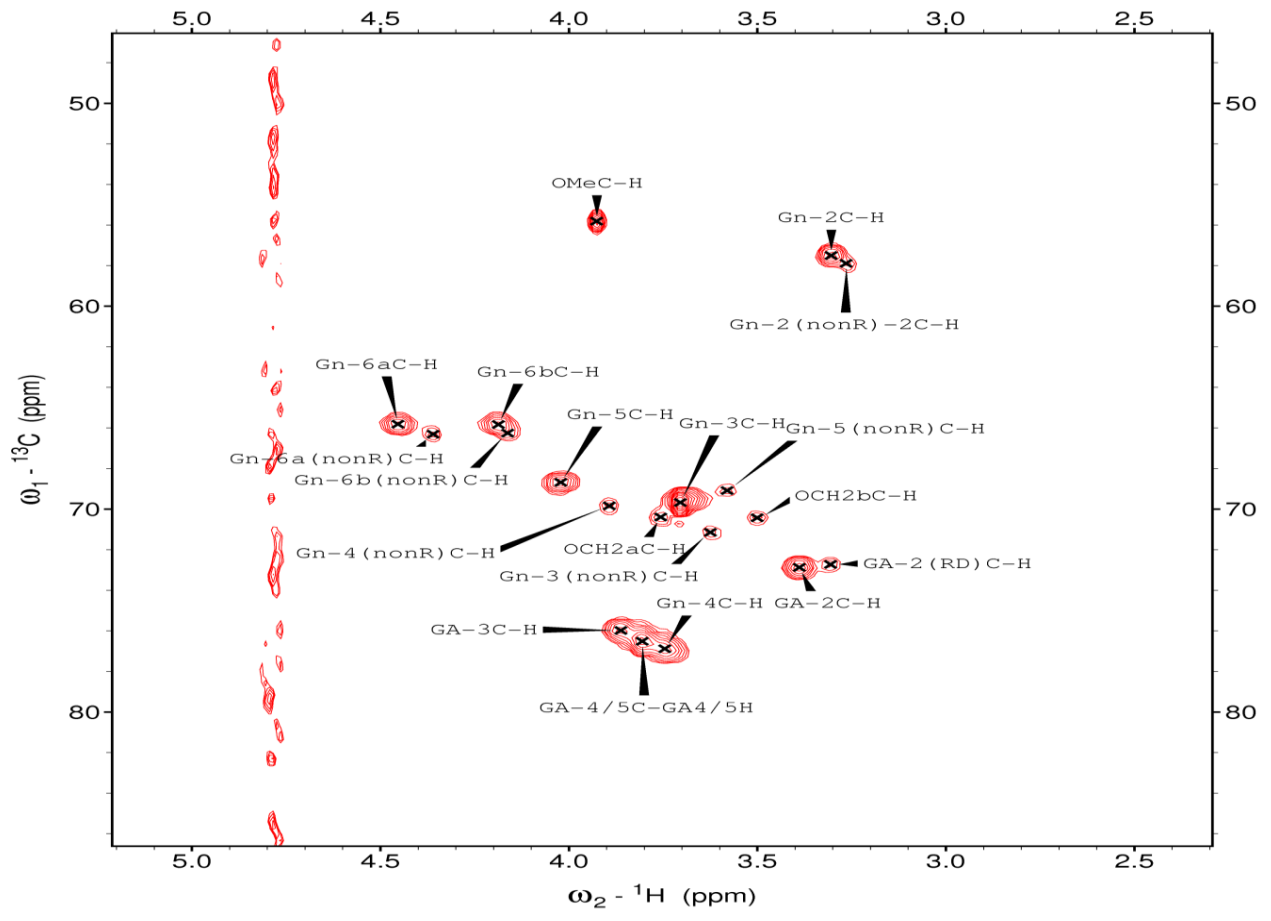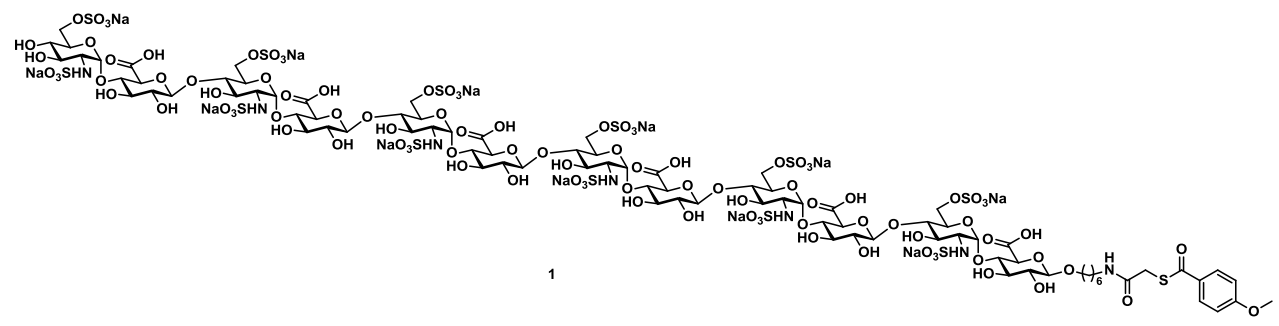

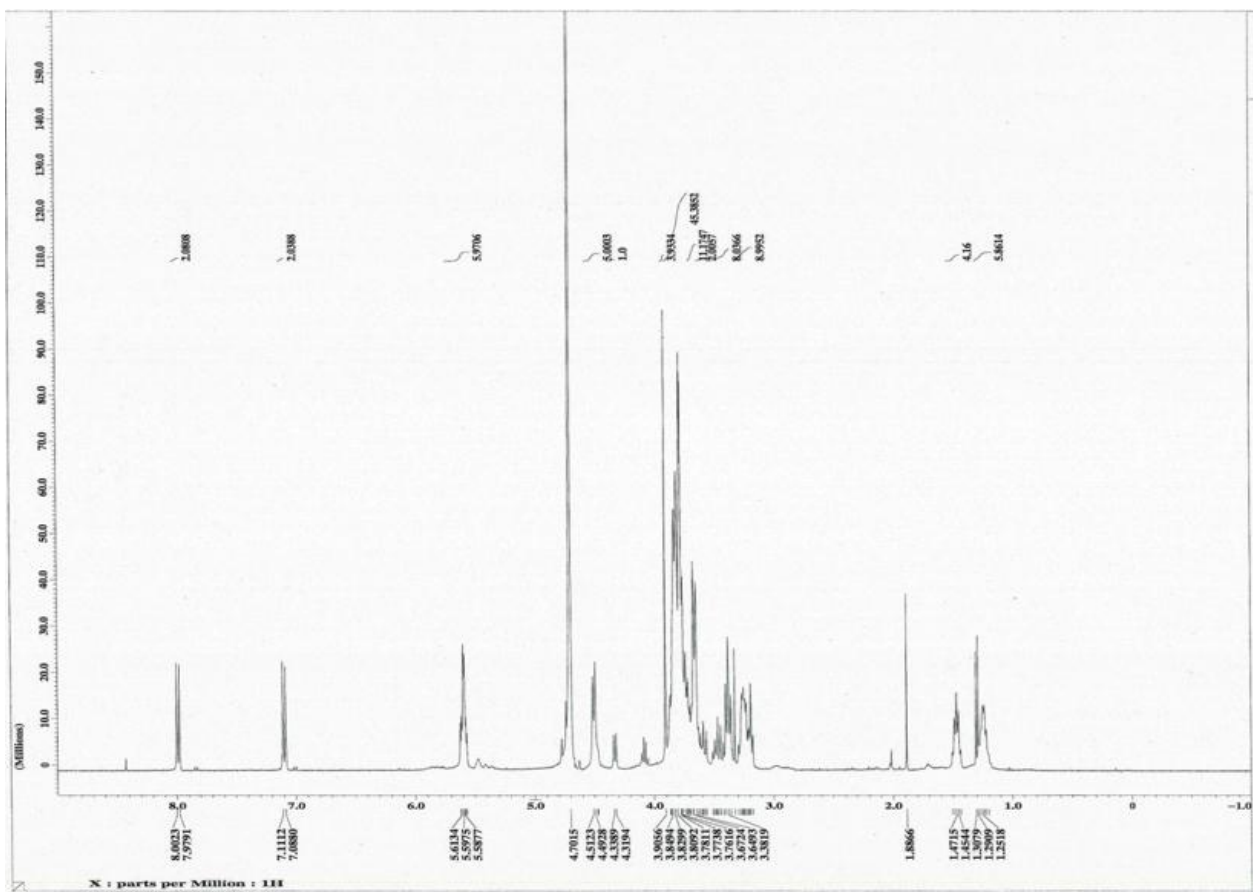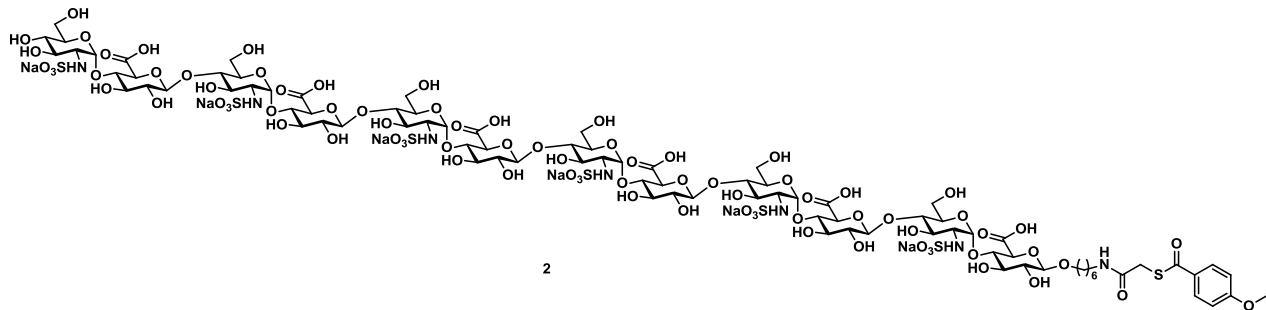

Supplement: c2ob26928g_2.pdf [file c2ob26928g_2.pdf]
